# Supplementary material for: Predicting two-dimensional semiconductors using conductivity effective mass
Source: Royal Society of Chemistry journal article supplement (doi:10.1039/d4cp00277f), 2024-01-01
Supplement: d4cp00277f1.pdf [file d4cp00277f1.pdf]

# Predicting Two-Dimensional Semiconductors

## Using Conductivity Effective Mass -

### Supplementary Information

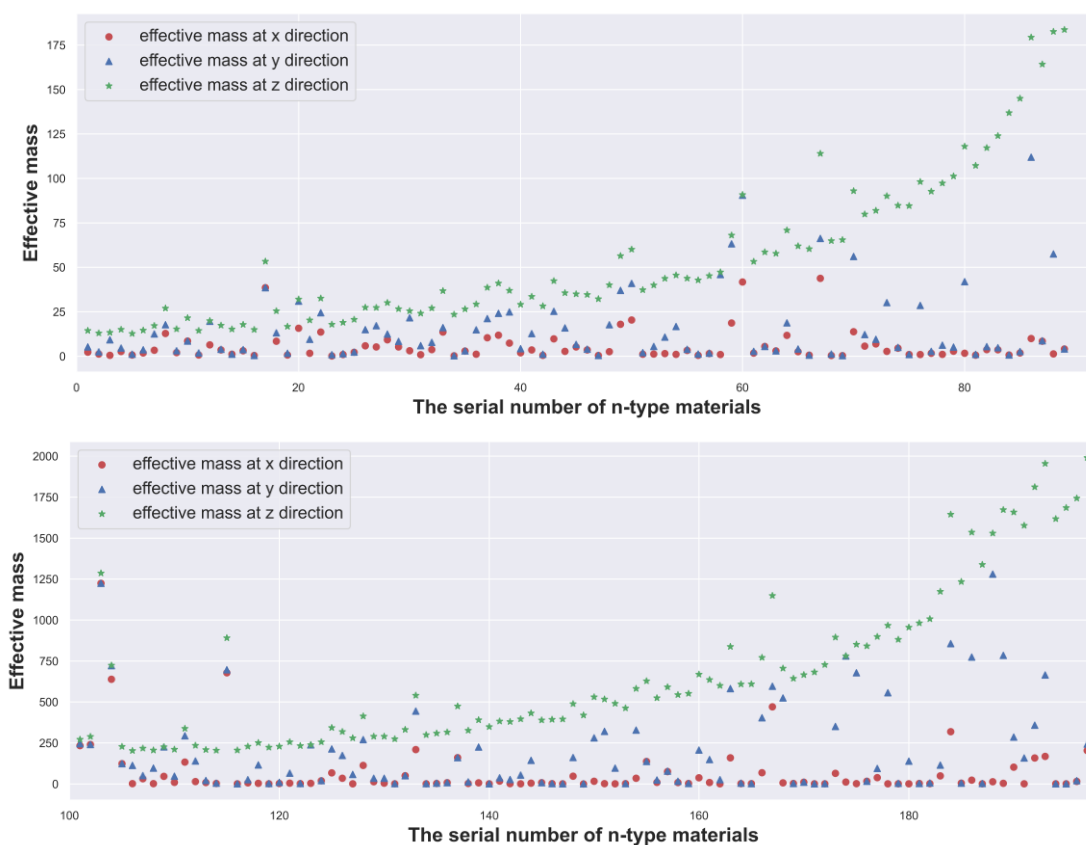

Figure S1 The effective mass distribution in the three crystallographic directions for a sample of materials shown in Figure 5-b of the main text. 186 materials were selected for display using an interval sampling method for the 904 materials with conductivity effective mass less than 2000. 0-100 are displayed in the top panel and 100-186 are displayed in the bottom panel. Please not the large difference in the y axis for the top and bottom plots.

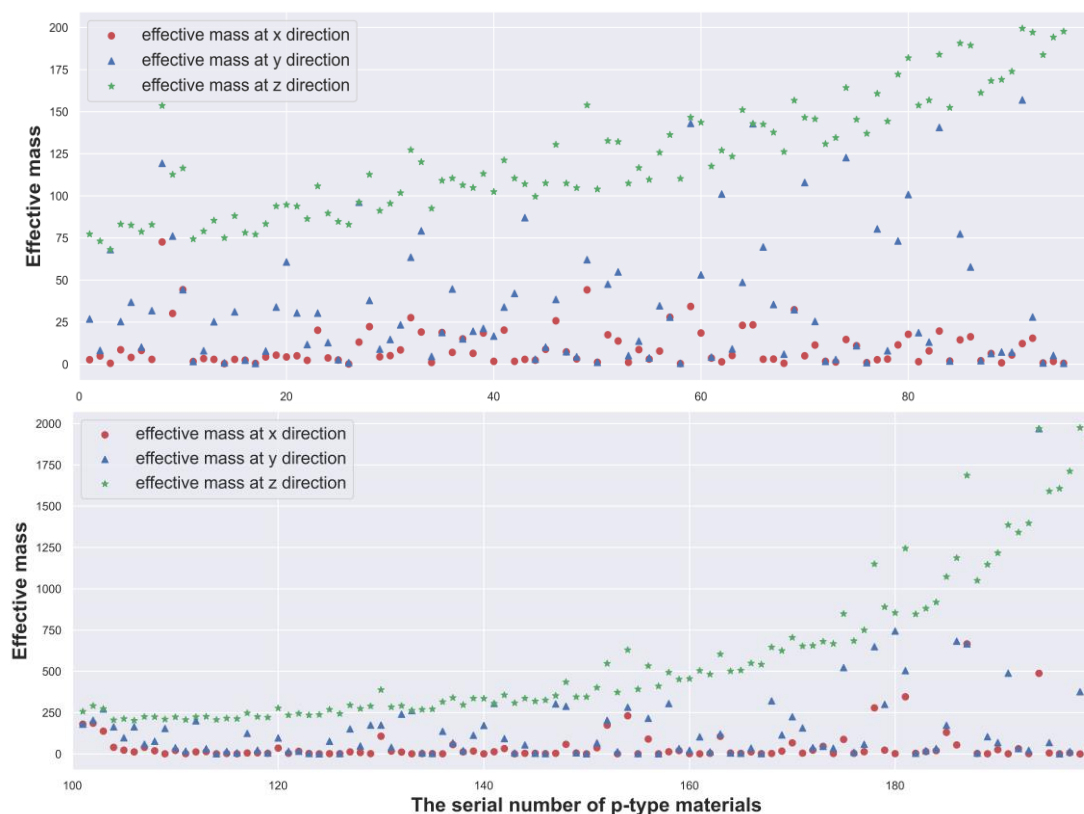

Figure S2 The effective mass distributions in the three crystallographic directions for a sample of materials shown in Figure 5-d of the main text. 194 materials were selected for display using an interval sampling method for the 867 materials with conductivity effective mass less than 2000. 0-100 are displayed in the top panel and 100-194 are displayed in the bottom panel. Please not the large difference in the y axis for the top and bottom plots.

When performing structural optimization and static calculations for a thousand candidate materials of each type  $p$  and  $n$ , we found that including the spin polarization of electrons made convergence difficult for a significant portion of the materials and so were omitted. For the choice of algorithms, Fast, Conjugate and Normal algorithms were employed sequentially to converge the structure. However, some materials still failed to reach the convergence criteria, and the convergence of the energy of  $p$ - and  $n$ -type materials at the level of PBE functional as well as the level of PBE-vdW functional calculation, respectively, is shown in the Figures S3 to S6.

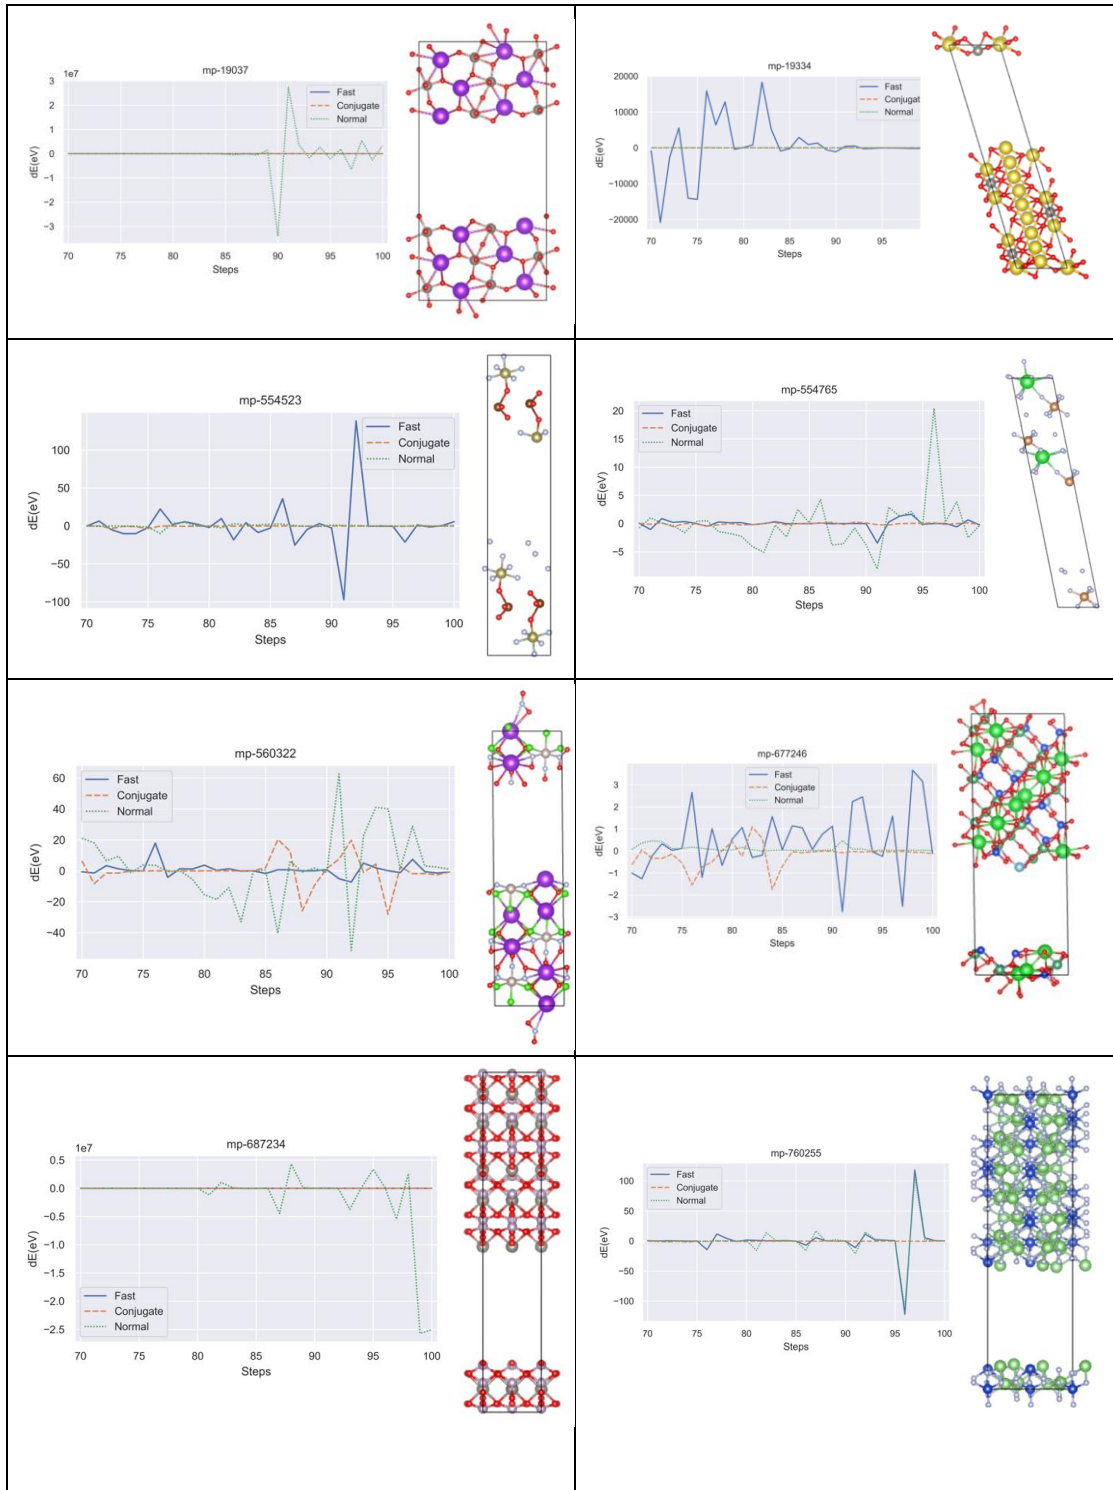

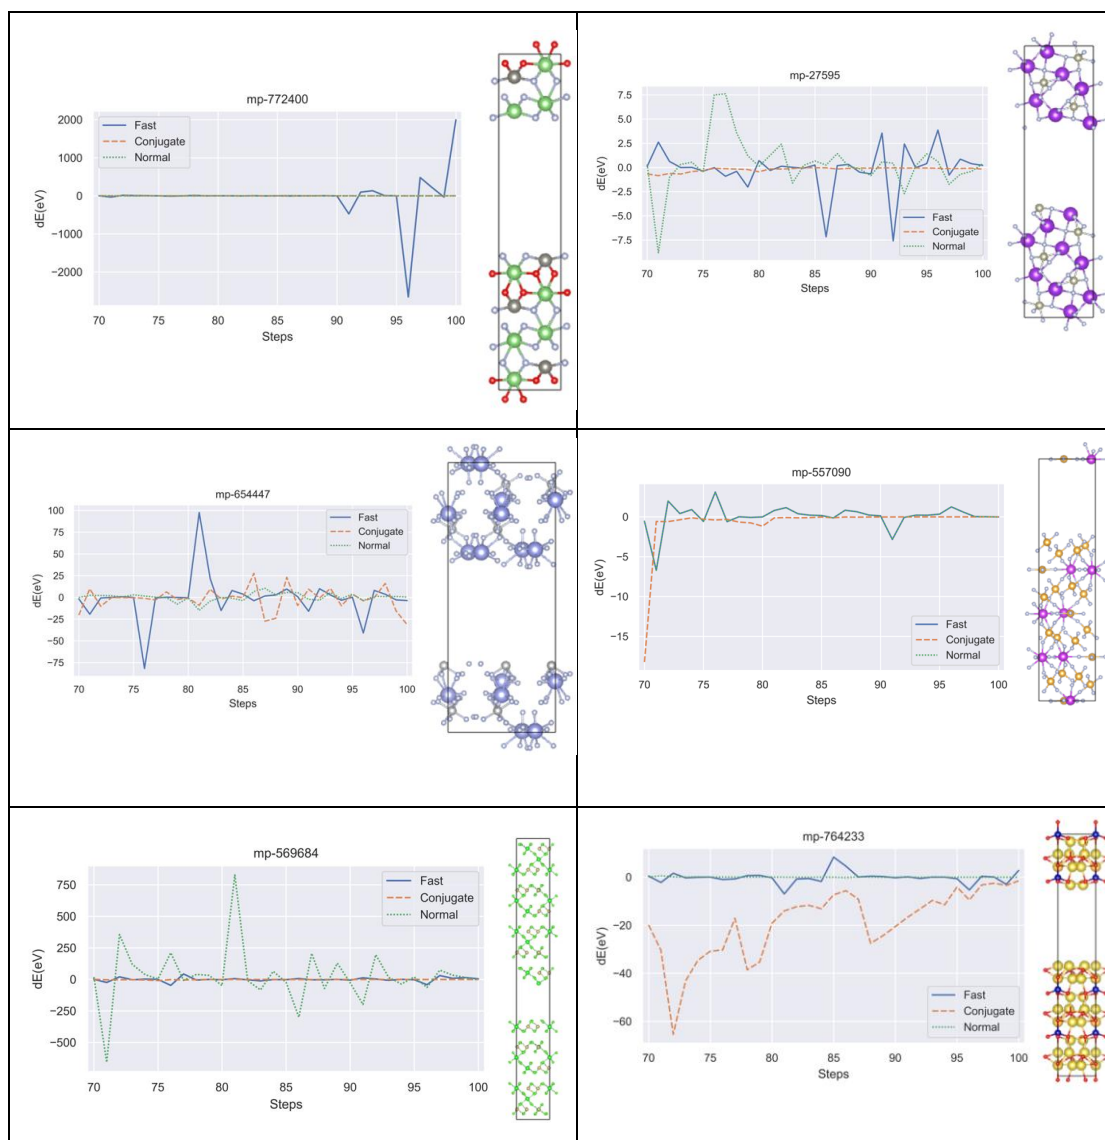

Figure S3 Diagrams depicting the change in energy (dE) during the relaxation of the p-type materials that failed to converge at the PBE level. The horizontal axis of the graph depicts the number of calculation steps and the colours represent the algorithms used during the calculation. The title of each graph is the Materials Project ID number. On the right side, the structure of the slab configuration is shown.

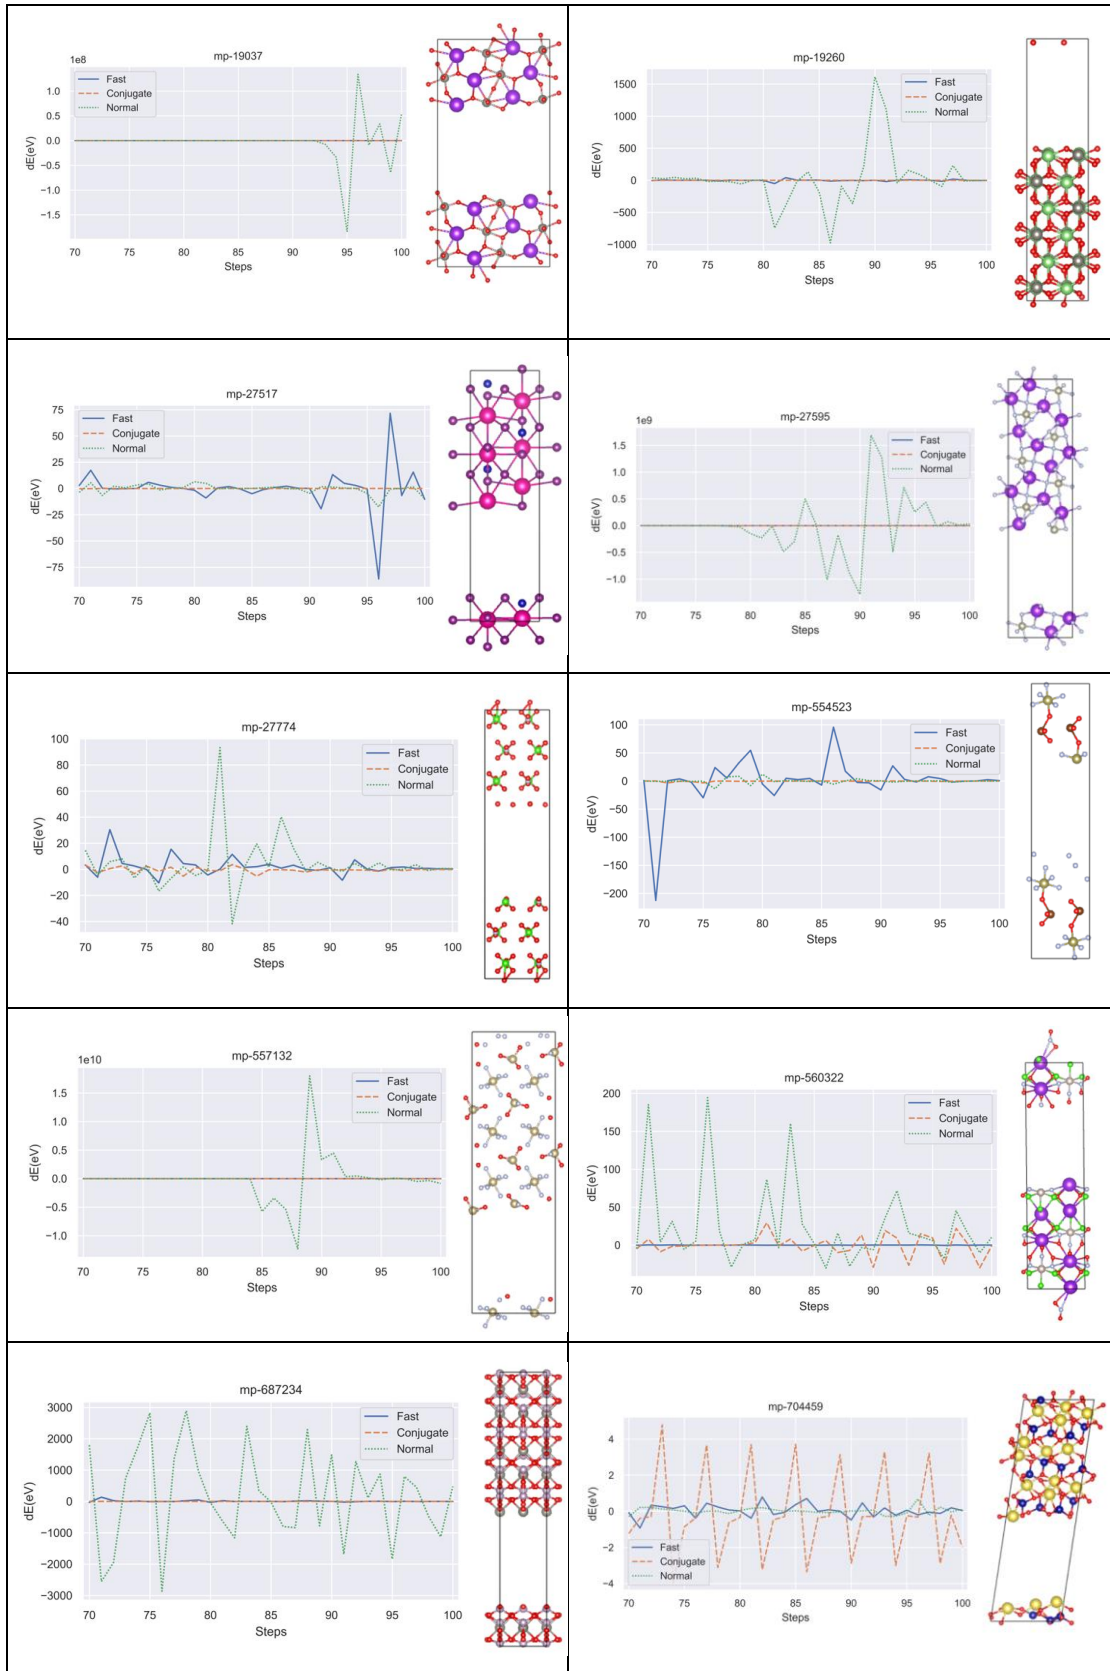

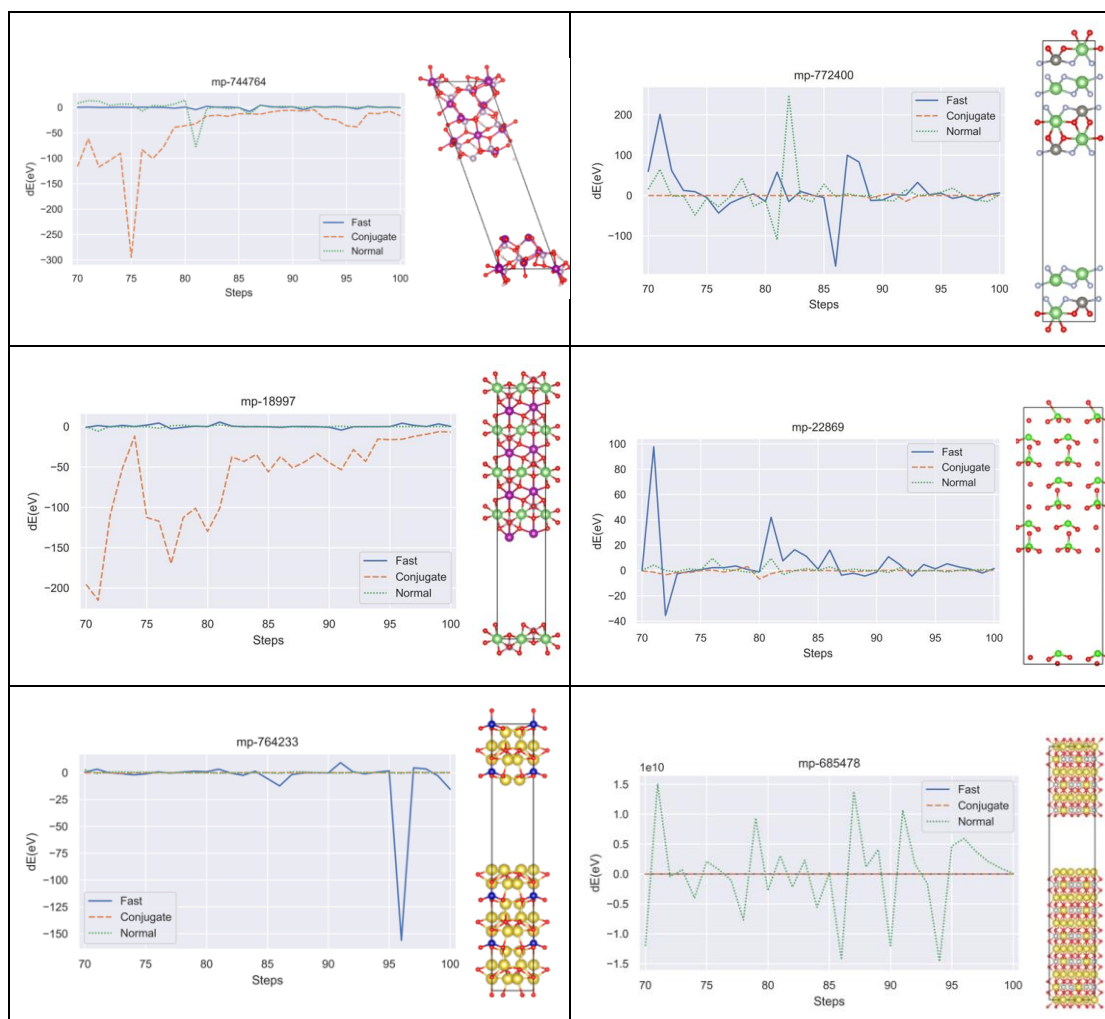

Figure S4 Diagrams depicting the change in energy ( $dE$ ) during the relaxation of the n-type materials that failed to converge at the PBE level. The horizontal axis of the graph depicts the number of calculation steps and the colours represent the algorithms used during the calculation. The title of each graph is the Materials Project ID number. On the right side, the structure of the slab configuration is shown.



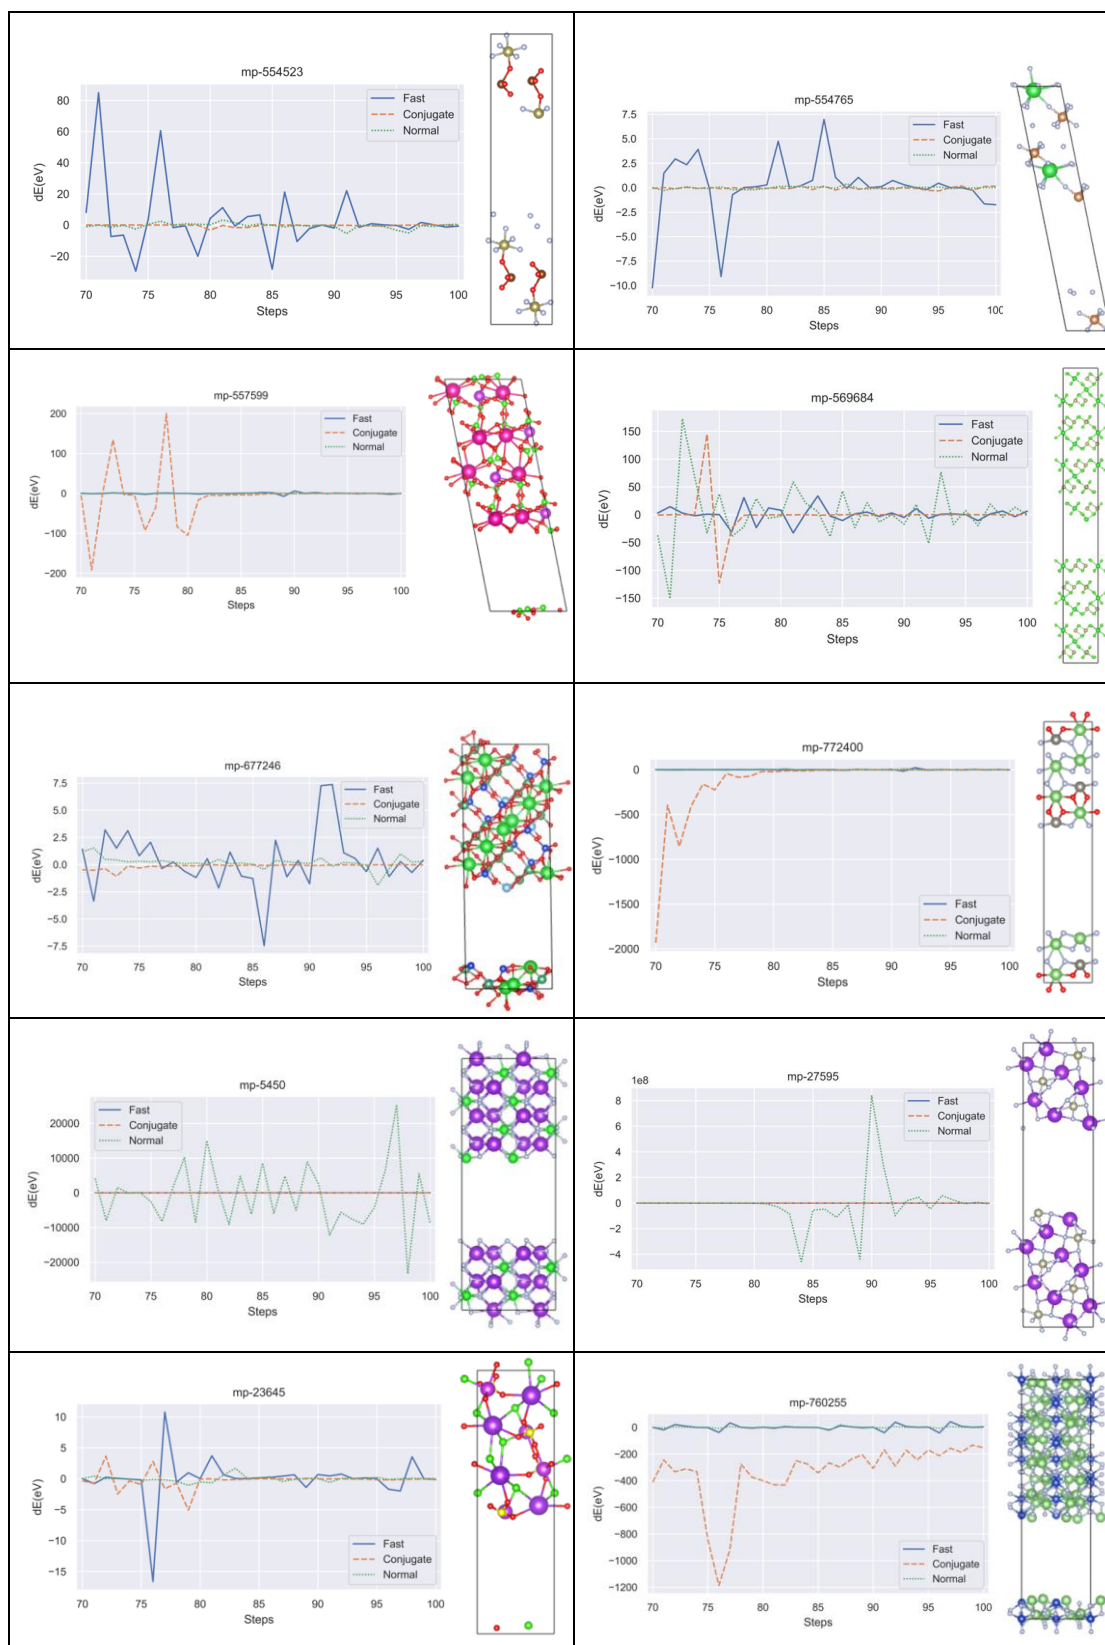

Figure S5 Diagrams depicting the change in energy (dE) during the relaxation of the p-type materials that failed to converge at the PBE+vdW level. The horizontal axis of the graph depicts the number of calculation steps and the colours represent the algorithms used during the calculation. The title of each graph is the Materials Project ID number. On the right side, the structure of the slab configuration is shown.

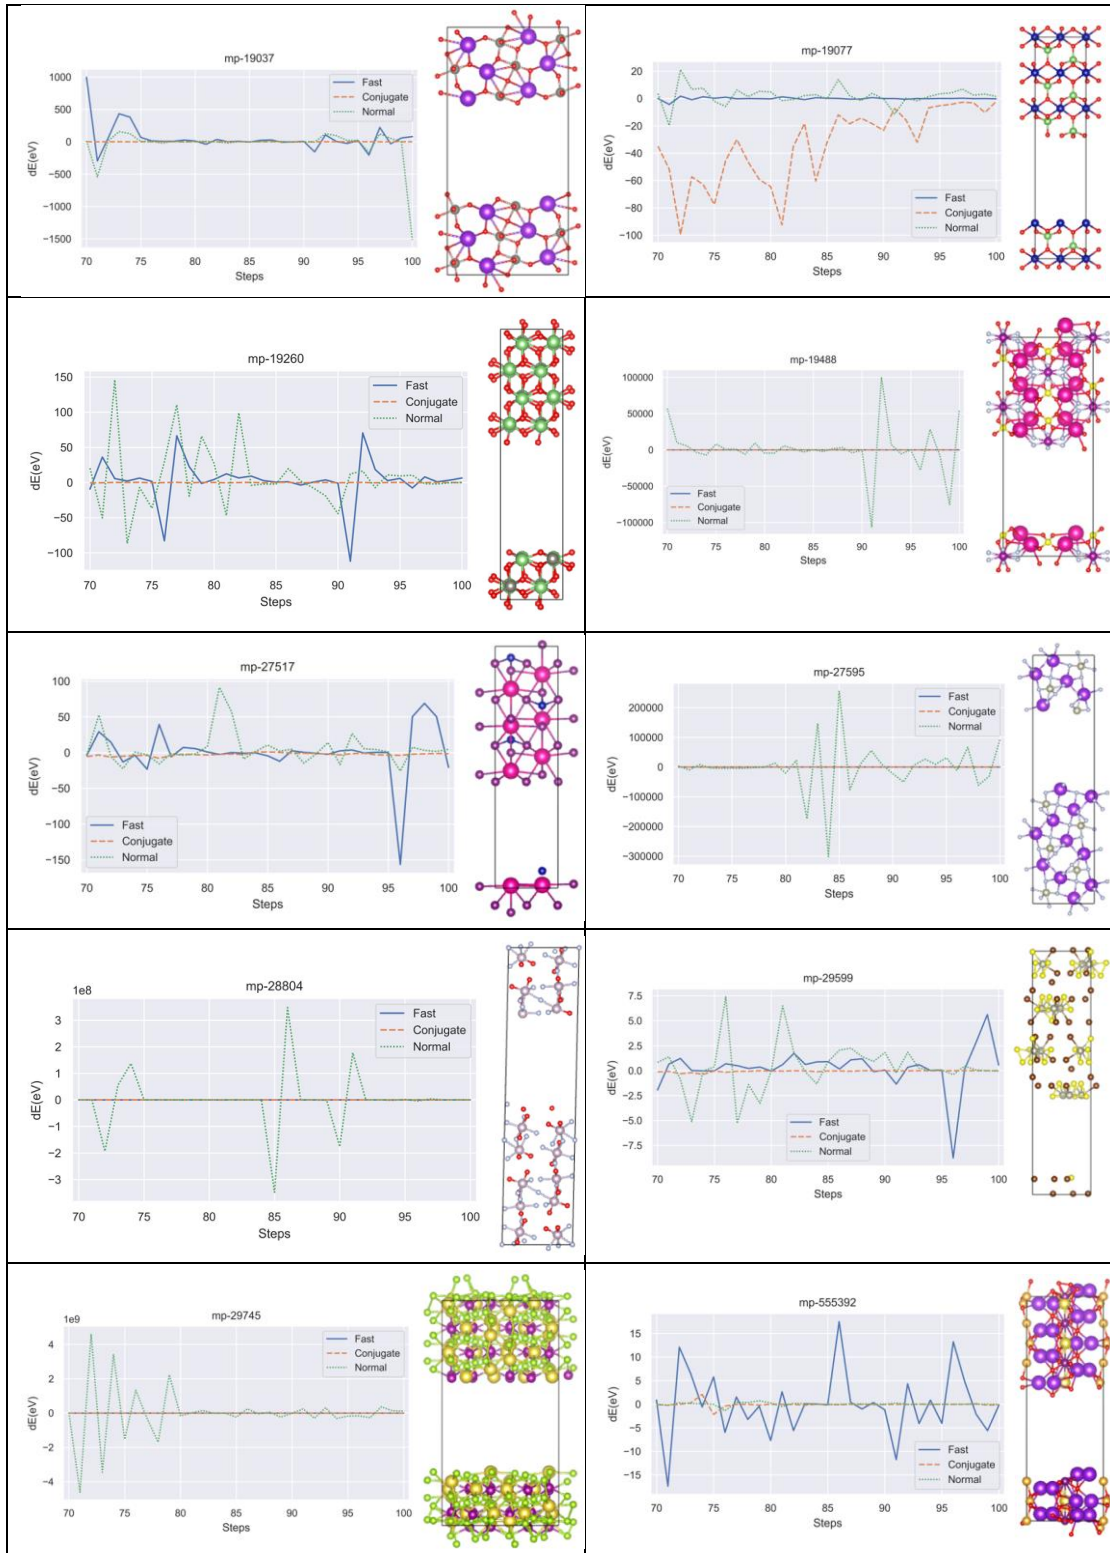



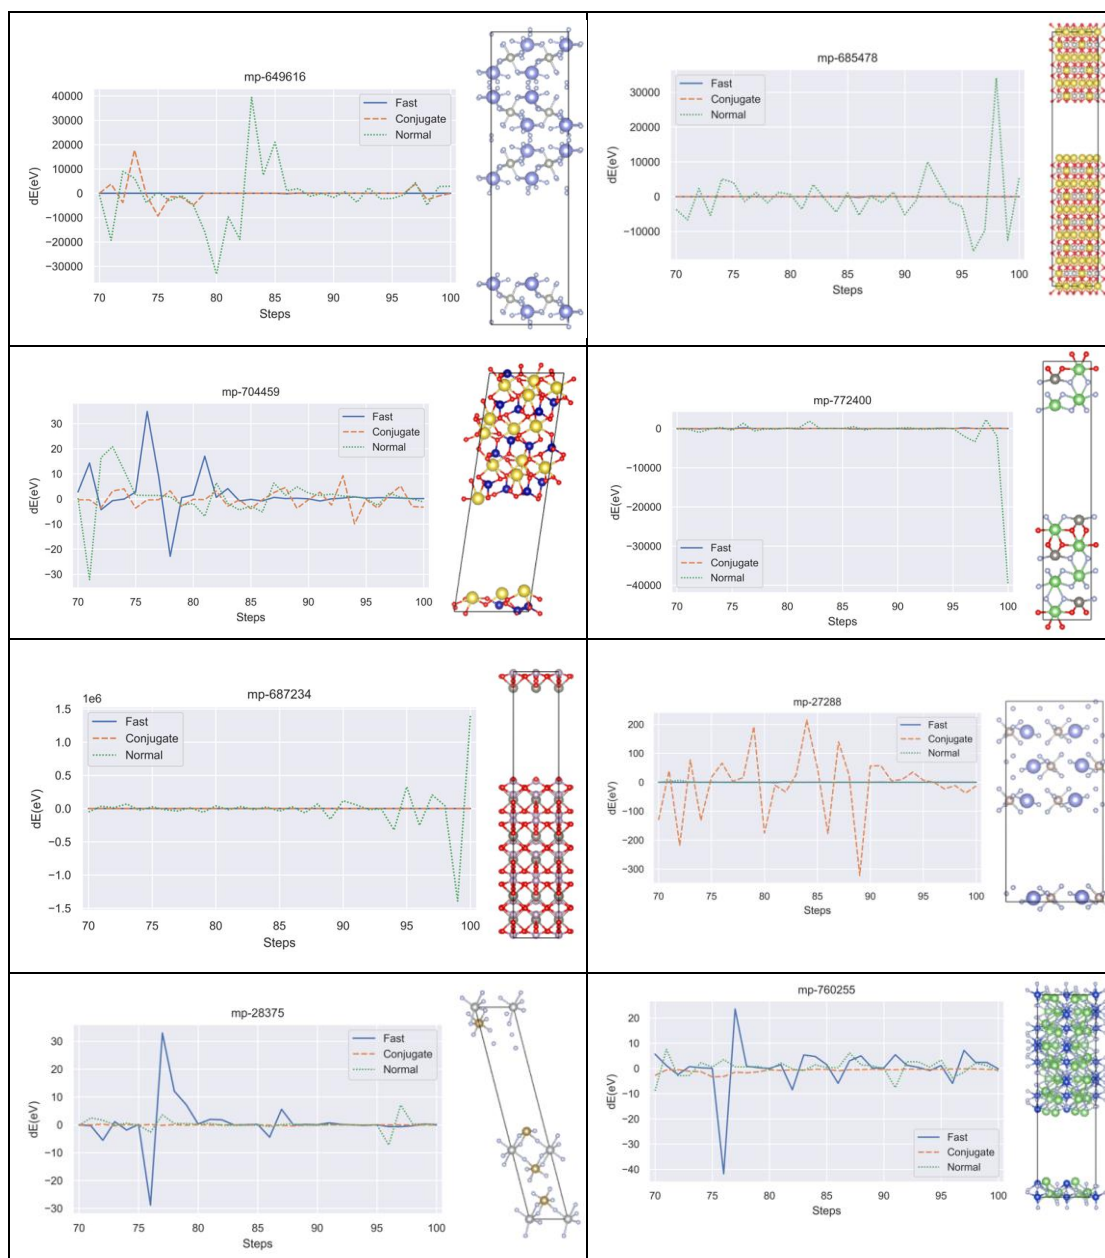

Figure S6 Diagrams depicting the change in energy (dE) during the relaxation of the n-type materials that failed to converge at the PBE+vdW level. The horizontal axis of the graph depicts the number of calculation steps and the colours represent the algorithms used during the calculation. The title of each graph is the Materials Project ID number. On the right side, the structure of the slab configuration is shown.

From the convergence process of the above materials, we can find that the energy change of most of the materials is haphazard, and the difference between the energy obtained from adjacent steps in the convergence process of some structures reaches outlandish extremes such as for mp-28804, mp-29745, mp-27595, mp-685478. There are some materials that have a gradual decrease in energy change during convergence, such as mp-560322, mp-27774, mp-554523, for which it is possible that they may converge eventually given enough calculation steps. However, some materials have been in a state of energy oscillation during the calculation

process and will likely never converge such as: mp-760255, mp-704459, mp-649616, mp-29745, mp-22869, mp-27774. Overall the cases of nonconvergence represent a very small minority of the data represented in this work.

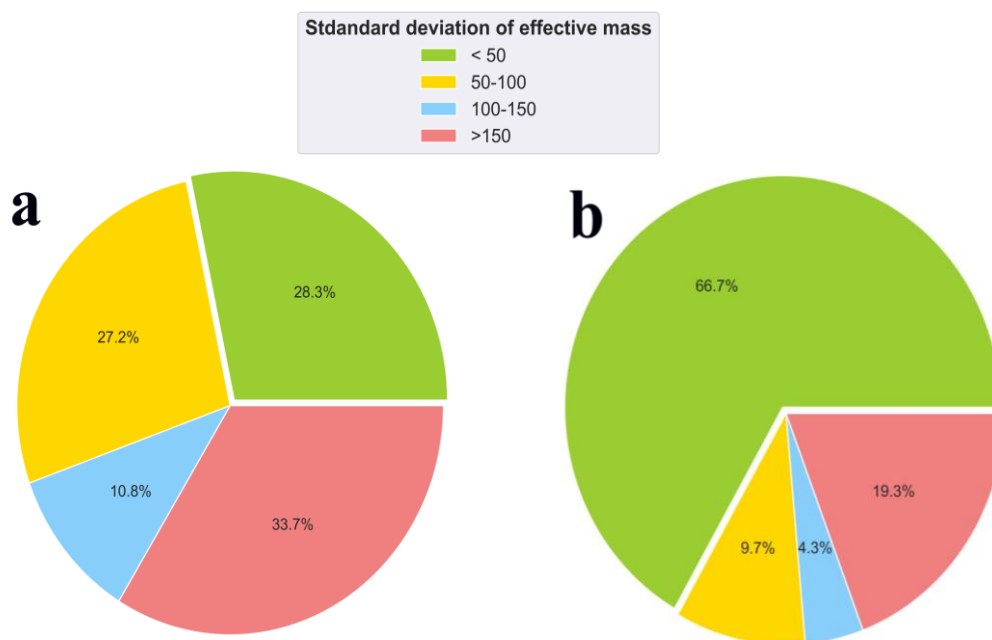

Figure S7: Interval distribution of conductivity effective mass standard deviation for (a) p-type and (b) n-type materials in Figure 5-d and -b of the main text.

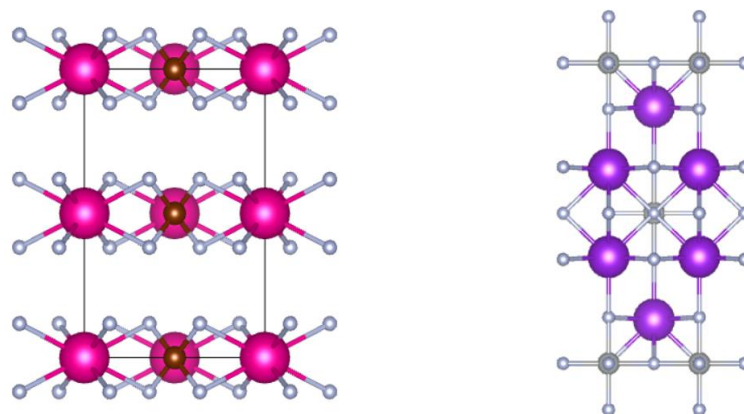

Figure S8: The schematic drawing of unit cell of the material with negative exfoliation. Left is mp-28577 with the chemical formula  $\text{RbBrF}_4$ , and the right is mp-556546, with the chemical formula  $\text{K}_2\text{NiF}_4$ .

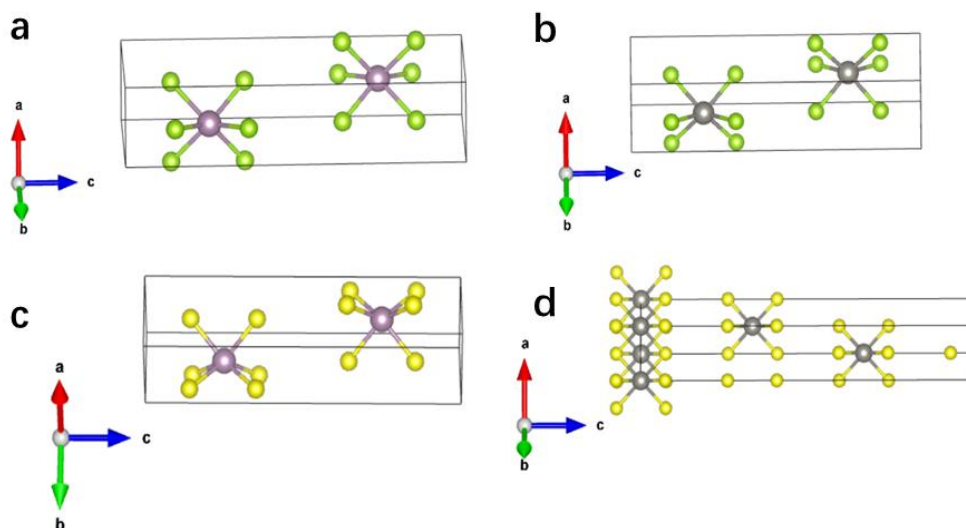

Figure S9 The atomic structure of a)  $\text{MoSe}_2$  b)  $\text{WSe}_2$  c)  $\text{MoS}_2$  and d)  $\text{WS}_2$ .

Table S1 Data for the results shown in Figure 5-b (n-type doping) along with Material Project ID (MPID) and chemical formula.

| <b>MPID</b> | <b>Formula</b> | <b>Standard deviation of effective mass</b> | <b><math>E_f</math> (eV/ <math>\text{\AA}^2</math>)</b> |
|-------------|----------------|---------------------------------------------|---------------------------------------------------------|
| mp-556546   | $K_2NiF_4$     | 1000                                        | 0.004                                                   |
| mp-28479    | $Sc_2CCl_2$    | 37.377                                      | 0.011                                                   |
| mp-567441   | HfIN           | 164.028                                     | 0.011                                                   |
| mp-29966    | NOF            | 7.637                                       | 0.008                                                   |
| mp-505727   | NCIO           | 45.887                                      | 0.007                                                   |
| mp-541911   | HfNCl          | 47.249                                      | 0.016                                                   |
| mp-28233    | $MnCl_2$       | 6.411                                       | 0.02                                                    |
| mp-552120   | YClO           | 304.938                                     | 0.015                                                   |
| mp-27850    | TiNCl          | 1000                                        | 0.015                                                   |
| mp-568592   | ZrNCl          | 81.757                                      | 0.017                                                   |
| mp-546279   | ScBrO          | 1000                                        | 0.014                                                   |
| mp-754031   | YBrO           | 85.648                                      | 0.016                                                   |
| mp-27849    | TiBrN          | 1000                                        | 0.016                                                   |
| mp-541912   | ZrBrN          | 60.952                                      | 0.018                                                   |
| mp-30031    | $CaI_2$        | 64.214                                      | 0.013                                                   |
| mp-643265   | $ReF_7$        | 9.522                                       | 0.009                                                   |
| mp-568346   | HfBrN          | 1000                                        | 0.015                                                   |
| mp-558928   | $KrF_2$        | 8.825                                       | 0.011                                                   |
| mp-28306    | $MnBr_2$       | 286.679                                     | 0.022                                                   |
| mp-23052    | ZrIN           | 1000                                        | 0.017                                                   |
| mp-28257    | $SOF_2$        | 9.03                                        | 0.007                                                   |
| mp-23184    | $BCl_3$        | 5.267                                       | 0.009                                                   |
| mp-28013    | $MnI_2$        | 84.792                                      | 0.024                                                   |
| mp-22987    | BiIO           | 11.906                                      | 0.02                                                    |
| mp-554108   | $LiRe(OF_2)_2$ | 309.02                                      | 0.014                                                   |
| mp-14653    | $AgSb_2F_{12}$ | 104.41                                      | 0.013                                                   |
| mp-23072    | BiBrO          | 6.077                                       | 0.022                                                   |
| mp-23309    | $ScCl_3$       | 7.479                                       | 0.01                                                    |
| mp-23225    | $BBr_3$        | 9.314                                       | 0.01                                                    |
| mp-23280    | $AsCl_3$       | 12.579                                      | 0.011                                                   |
| mp-30103    | $AuF_5$        | 90.227                                      | 0.009                                                   |
| mp-697133   | $Cs_2CaH_4$    | 9.862                                       | 0.022                                                   |
| mp-28067    | ThIN           | 24.438                                      | 0.027                                                   |
| mp-23189    | $BI_3$         | 5.812                                       | 0.012                                                   |
| mp-573051   | $ReO_3F$       | 7.545                                       | 0.012                                                   |
| mp-561317   | $Rb_2NiF_4$    | 1000                                        | 0.03                                                    |
| mp-28099    | SBr            | 12.025                                      | 0.017                                                   |
| mp-19167    | $Rb_2NiO_2$    | 80.834                                      | 0.035                                                   |

|           |                                                                  |         |       |
|-----------|------------------------------------------------------------------|---------|-------|
| mp-29940  | SbClF <sub>10</sub>                                              | 1000    | 0.012 |
| mp-22978  | Rb <sub>2</sub> MnCl <sub>4</sub>                                | 1000    | 0.029 |
| mp-560851 | CsIOF <sub>4</sub>                                               | 30.547  | 0.017 |
| mp-560449 | K <sub>3</sub> Ni <sub>2</sub> F <sub>7</sub>                    | 543.866 | 0.045 |
| mp-30943  | MgPSe <sub>3</sub>                                               | 55.675  | 0.021 |
| mp-19252  | K <sub>2</sub> NiO <sub>2</sub>                                  | 32.672  | 0.05  |
| mp-8616   | ScAg(PS <sub>3</sub> ) <sub>2</sub>                              | 11.061  | 0.023 |
| mp-30295  | W <sub>6</sub> CCl <sub>18</sub>                                 | 47.448  | 0.01  |
| mp-28938  | Nb <sub>3</sub> TeCl <sub>7</sub>                                | 9.572   | 0.019 |
| mp-558725 | Ba <sub>3</sub> Ru <sub>2</sub> Br <sub>2</sub> O <sub>9</sub>   | 35.562  | 0.027 |
| mp-642795 | PHSF <sub>2</sub>                                                | 5.391   | 0.021 |
| mp-7148   | K <sub>2</sub> SrTa <sub>2</sub> O <sub>7</sub>                  | 1000    | 0.051 |
| mp-27358  | Se <sub>2</sub> O <sub>5</sub>                                   | 12.301  | 0.026 |
| mp-29422  | HfCl <sub>4</sub>                                                | 11.566  | 0.018 |
| mp-23472  | Re(AgCl <sub>3</sub> ) <sub>2</sub>                              | 12.521  | 0.025 |
| mp-8192   | Rb <sub>2</sub> PtF <sub>6</sub>                                 | 414.351 | 0.03  |
| mp-561379 | GaRe(Cl <sub>3</sub> O) <sub>2</sub>                             | 25.821  | 0.01  |
| mp-10402  | TiTi <sub>2</sub> F <sub>6</sub>                                 | 15.446  | 0.029 |
| mp-7979   | K <sub>2</sub> PdF <sub>6</sub>                                  | 36.232  | 0.034 |
| mp-3821   | K <sub>2</sub> PtF <sub>6</sub>                                  | 25.801  | 0.036 |
| mp-27501  | Cs <sub>2</sub> ThCl <sub>6</sub>                                | 84.576  | 0.021 |
| mp-30984  | S(IO <sub>3</sub> ) <sub>2</sub>                                 | 5.617   | 0.015 |
| mp-30977  | B <sub>3</sub> H <sub>6</sub> Br                                 | 9.04    | 0.012 |
| mp-27782  | XeIF <sub>7</sub>                                                | 66.555  | 0.019 |
| mp-28601  | NbBr <sub>5</sub>                                                | 15.55   | 0.015 |
| mp-29402  | KGaI <sub>4</sub>                                                | 7.274   | 0.019 |
| mp-3970   | K <sub>2</sub> TiF <sub>6</sub>                                  | 16.734  | 0.042 |
| mp-7824   | K <sub>2</sub> ReF <sub>6</sub>                                  | 13.822  | 0.039 |
| mp-555805 | AlSCl <sub>7</sub>                                               | 26.41   | 0.031 |
| mp-680059 | Re <sub>3</sub> (SCl) <sub>7</sub>                               | 389.736 | 0.016 |
| mp-622197 | Cs <sub>2</sub> PtS <sub>4</sub> (O <sub>3</sub> F) <sub>6</sub> | 1000    | 0.017 |
| mp-23076  | Rb <sub>2</sub> CoCl <sub>4</sub>                                | 384.623 | 0.02  |
| mp-764233 | Na <sub>4</sub> CoO <sub>6</sub>                                 | 26.061  | 0.039 |
| mp-562569 | CsPPbS <sub>4</sub>                                              | 30.236  | 0.031 |
| mp-561011 | Li <sub>2</sub> Ta <sub>2</sub> (OF <sub>2</sub> ) <sub>3</sub>  | 263.593 | 0.05  |
| mp-624117 | Cs <sub>3</sub> V <sub>4</sub> Te <sub>2</sub> ClO <sub>14</sub> | 414.251 | 0.037 |
| mp-29432  | NaScCl <sub>4</sub>                                              | 26.034  | 0.036 |
| mp-8720   | Rb <sub>2</sub> MnTe <sub>2</sub>                                | 11.563  | 0.029 |
| mp-638009 | RbPPbS <sub>4</sub>                                              | 15.74   | 0.035 |
| mp-2865   | K <sub>2</sub> CuF <sub>4</sub>                                  | 39.43   | 0.046 |
| mp-9321   | Ba <sub>2</sub> HfS <sub>4</sub>                                 | 52.806  | 0.063 |
| mp-13985  | Li <sub>2</sub> PdF <sub>6</sub>                                 | 302.332 | 0.07  |
| mp-754128 | Ba <sub>3</sub> Hf <sub>2</sub> O <sub>7</sub>                   | 13.48   | 0.089 |



|           |                                                    |         |       |
|-----------|----------------------------------------------------|---------|-------|
| mp-18003  | CsCuS <sub>4</sub>                                 | 40.912  | 0.034 |
| mp-638150 | KPPbS <sub>4</sub>                                 | 25.154  | 0.038 |
| mp-556741 | KNaThF <sub>6</sub>                                | 145.108 | 0.046 |
| mp-17095  | CsCuSe <sub>4</sub>                                | 46.414  | 0.032 |
| mp-10322  | BaHfN <sub>2</sub>                                 | 180.93  | 0.094 |
| mp-8335   | Ba <sub>2</sub> ZrO <sub>4</sub>                   | 15.023  | 0.09  |
| mp-3104   | BaZrN <sub>2</sub>                                 | 111.406 | 0.093 |
| mp-755895 | Ba <sub>3</sub> Zr <sub>2</sub> O <sub>7</sub>     | 35.055  | 0.091 |
| mp-9205   | KSeO <sub>2</sub> F                                | 22.678  | 0.06  |
| mp-27389  | KSb <sub>2</sub> F <sub>7</sub>                    | 62.235  | 0.025 |
| mp-8719   | K <sub>2</sub> MnTe <sub>2</sub>                   | 15.405  | 0.037 |
| mp-559068 | Na <sub>2</sub> Pd(SeO <sub>4</sub> ) <sub>2</sub> | 23.203  | 0.059 |
| mp-540584 | K <sub>2</sub> PdO <sub>2</sub>                    | 42.654  | 0.089 |
| mp-18365  | RbCuSe <sub>4</sub>                                | 6.316   | 0.036 |
| mp-5532   | Sr <sub>2</sub> TiO <sub>4</sub>                   | 1000    | 0.116 |
| mp-3349   | Sr <sub>3</sub> Ti <sub>2</sub> O <sub>7</sub>     | 185.856 | 0.115 |
| mp-6560   | KSO <sub>2</sub> F                                 | 45.937  | 0.066 |
| mp-18996  | TiV <sub>3</sub> O <sub>8</sub>                    | 12.88   | 0.041 |
| mp-9517   | SrTiN <sub>2</sub>                                 | 1000    | 0.121 |
| mp-867570 | Rb <sub>4</sub> Sb <sub>2</sub> O <sub>5</sub>     | 29.446  | 0.034 |
| mp-6384   | RbSO <sub>2</sub> F                                | 52.814  | 0.063 |
| mp-556645 | RbNbAsClO <sub>5</sub>                             | 85.26   | 0.041 |
| mp-29405  | RbSnI <sub>3</sub>                                 | 28.622  | 0.039 |
| mp-19172  | KV <sub>3</sub> O <sub>8</sub>                     | 67.283  | 0.044 |
| mp-3637   | YOF                                                | 76      | 0.154 |
| mp-757850 | K <sub>4</sub> Sb <sub>2</sub> O <sub>5</sub>      | 71.87   | 0.039 |
| mp-567681 | CsPbBr <sub>3</sub>                                | 5.531   | 0.043 |
| mp-647813 | Cs <sub>2</sub> CrO <sub>4</sub>                   | 18.653  | 0.038 |
| mp-559911 | V <sub>4</sub> S <sub>4</sub> Br <sub>4</sub>      | 22.272  | 0.018 |
| mp-16915  | BaTiOF <sub>4</sub>                                | 211.946 | 0.071 |
| mp-29304  | Y <sub>2</sub> InCl <sub>7</sub>                   | 18.187  | 0.024 |
| mp-572546 | CsRe(Cl <sub>2</sub> O) <sub>2</sub>               | 125.655 | 0.029 |
| mp-7928   | K <sub>2</sub> PtS <sub>2</sub>                    | 11.852  | 0.087 |
| mp-8621   | K <sub>2</sub> PtSe <sub>2</sub>                   | 7.369   | 0.082 |
| mp-8623   | K <sub>2</sub> Te <sub>2</sub> Pt                  | 5.966   | 0.073 |
| mp-29300  | Ga <sub>2</sub> CuCl <sub>8</sub>                  | 912.276 | 0.045 |
| mp-567776 | Cs <sub>2</sub> AgAuCl <sub>6</sub>                | 144.263 | 0.045 |
| mp-11924  | Rb <sub>2</sub> TaCuSe <sub>4</sub>                | 5.247   | 0.029 |
| mp-42190  | K <sub>2</sub> NaTiOF <sub>5</sub>                 | 759.456 | 0.069 |
| mp-40143  | Cs <sub>2</sub> KZrOF <sub>5</sub>                 | 8.248   | 0.056 |
| mp-8972   | K <sub>2</sub> TaCuSe <sub>4</sub>                 | 16.837  | 0.032 |
| mp-555160 | CsYSeCl <sub>2</sub> O <sub>3</sub>                | 178.754 | 0.053 |
| mp-12047  | K <sub>3</sub> Na(RuO <sub>4</sub> ) <sub>2</sub>  | 5.67    | 0.081 |

|           |                                        |         |       |
|-----------|----------------------------------------|---------|-------|
| mp-27126  | $\text{Na}_2\text{Mn}_3\text{Cl}_8$    | 22.402  | 0.06  |
| mp-29817  | $\text{GaP}_2\text{I}_9$               | 11.642  | 0.012 |
| mp-8900   | $\text{K}_2\text{VAgS}_4$              | 18.961  | 0.036 |
| mp-866301 | $\text{BaBSbS}_4$                      | 8.359   | 0.046 |
| mp-567928 | $\text{CsBi}_3\text{Se}_5$             | 1000    | 0.054 |
| mp-28453  | $\text{CsAuI}_3$                       | 29.869  | 0.041 |
| mp-569548 | $\text{CsAuBr}_3$                      | 75.682  | 0.05  |
| mp-8570   | $\text{Ba}_3\text{Zr}_2\text{S}_7$     | 6.427   | 0.059 |
| mp-23153  | I                                      | 68.757  | 0.092 |
| mp-765136 | $\text{LiMn}_8\text{F}_{33}$           | 49.268  | 0.048 |
| mp-6999   | $\text{ScPS}_4$                        | 12.448  | 0.077 |
| mp-753546 | $\text{Li}_8\text{TiS}_6$              | 8.148   | 0.077 |
| mp-23484  | $\text{CsAuCl}_3$                      | 258.965 | 0.056 |
| mp-8226   | $\text{ThNF}$                          | 75.174  | 0.224 |
| mp-8725   | $\text{HfSnS}_3$                       | 13.635  | 0.092 |
| mp-28046  | $\text{AlP}_2\text{I}_9$               | 14.267  | 0.016 |
| mp-766540 | $\text{Li}_4\text{TiS}_4$              | 23.218  | 0.069 |
| mp-28159  | $\text{As}(\text{BrF}_2)_3$            | 24.029  | 0.074 |
| mp-561259 | $\text{Na}_3\text{NbOF}_6$             | 223.444 | 0.099 |
| mp-7571   | $\text{KNbF}_6$                        | 37.49   | 0.117 |
| mp-754712 | $\text{NClO}_3$                        | 5.328   | 0.116 |
| mp-29526  | $\text{BrNO}_3$                        | 6.471   | 0.11  |
| mp-29345  | $\text{LiGaI}_3$                       | 6.548   | 0.043 |
| mp-600186 | $\text{Cs}_2\text{MnBr}_4$             | 39.341  | 0.046 |
| mp-770618 | $\text{MgMnO}_3$                       | 5.696   | 0.169 |
| mp-28205  | $\text{Na}_3\text{ReO}_5$              | 25.006  | 0.137 |
| mp-8818   | $\text{Ca}_2\text{ZnN}_2$              | 33.023  | 0.292 |
| mp-29287  | $\text{Cs}_3\text{CoBr}_5$             | 28.307  | 0.039 |
| mp-23154  | Br                                     | 41.875  | 0.126 |
| mp-27445  | $\text{As}(\text{IF}_2)_3$             | 11.694  | 0.078 |
| mp-557772 | $\text{CsNiF}_3$                       | 26.27   | 0.112 |
| mp-540760 | $\text{FePcl}_8$                       | 34.54   | 0.049 |
| mp-641699 | $\text{CsNb}_2\text{PS}_{10}$          | 6.859   | 0.039 |
| mp-556244 | $\text{Xe}_2\text{NO}_2\text{F}_{13}$  | 8.085   | 0.03  |
| mp-14988  | $\text{K}_4\text{SnO}_3$               | 6.088   | 0.053 |
| mp-616439 | $\text{Cs}_2\text{CuCl}_4$             | 18.102  | 0.052 |
| mp-561710 | $\text{CsSnS}_3$                       | 5.572   | 0.083 |
| mp-761057 | $\text{Sr}_5\text{Nb}_4\text{O}_{15}$  | 6.653   | 0.142 |
| mp-28178  | $\text{NaNbCl}_6$                      | 13.217  | 0.09  |
| mp-560601 | $\text{K}_2\text{CuS}(\text{ClO}_2)_2$ | 67.918  | 0.084 |
| mp-769582 | $\text{Sr}_5\text{Ta}_4\text{O}_{15}$  | 5.743   | 0.147 |
| mp-19388  | $\text{BaNi}_2(\text{AsO}_4)_2$        | 6.166   | 0.193 |
| mp-569060 | $\text{Cs}_2\text{PSe}_5$              | 6.238   | 0.075 |

|           |                                                                |         |       |
|-----------|----------------------------------------------------------------|---------|-------|
| mp-22876  | CsI <sub>3</sub>                                               | 6.657   | 0.061 |
| mp-772813 | Ca <sub>2</sub> Cu <sub>2</sub> O <sub>5</sub>                 | 7.715   | 0.116 |
| mp-568244 | TlSn <sub>2</sub> Br <sub>5</sub>                              | 30.669  | 0.063 |
| mp-17315  | Zr <sub>3</sub> Tl <sub>2</sub> OF <sub>12</sub>               | 66.292  | 0.083 |
| mp-30106  | AsCl <sub>5</sub>                                              | 5.612   | 0.097 |
| mp-27641  | CsBr <sub>3</sub>                                              | 12.17   | 0.07  |
| mp-27750  | AsXeF <sub>7</sub>                                             | 9.36    | 0.106 |
| mp-23515  | K <sub>2</sub> CoCl <sub>4</sub>                               | 122.478 | 0.052 |
| mp-540572 | NCl <sub>3</sub>                                               | 9.496   | 0.063 |
| mp-30164  | CsSn <sub>2</sub> Cl <sub>5</sub>                              | 74.504  | 0.071 |
| mp-23541  | KSn <sub>2</sub> Br <sub>5</sub>                               | 60.07   | 0.068 |
| mp-19660  | Sr <sub>2</sub> V <sub>2</sub> O <sub>7</sub>                  | 41.456  | 0.091 |
| mp-30011  | SbKrF <sub>7</sub>                                             | 6.025   | 0.079 |
| mp-567780 | RbSn <sub>2</sub> Br <sub>5</sub>                              | 81.136  | 0.067 |
| mp-554732 | RbSbS(O <sub>2</sub> F) <sub>2</sub>                           | 10.061  | 0.09  |
| mp-30010  | AsKrF <sub>7</sub>                                             | 8.843   | 0.084 |
| mp-760678 | Sb <sub>2</sub> H <sub>4</sub> AuF <sub>16</sub>               | 344.183 | 0.143 |
| mp-23630  | NbBi <sub>4</sub> ClO <sub>8</sub>                             | 10.935  | 0.156 |
| mp-510557 | CsN <sub>3</sub>                                               | 5.382   | 0.108 |
| mp-17085  | Rb <sub>2</sub> Zr <sub>3</sub> OF <sub>12</sub>               | 1000    | 0.093 |
| mp-7280   | PPdS                                                           | 8.968   | 0.153 |
| mp-17256  | Rb <sub>2</sub> Hf <sub>3</sub> OF <sub>12</sub>               | 745.713 | 0.096 |
| mp-672273 | AlBiCl <sub>6</sub>                                            | 7.566   | 0.054 |
| mp-28163  | K <sub>2</sub> PdF <sub>4</sub>                                | 138.818 | 0.086 |
| mp-17888  | K <sub>2</sub> Zr <sub>3</sub> OF <sub>12</sub>                | 693.092 | 0.1   |
| mp-557451 | CsReOF <sub>6</sub>                                            | 226.783 | 0.088 |
| mp-23539  | KSn <sub>2</sub> Cl <sub>5</sub>                               | 29.913  | 0.084 |
| mp-13986  | Li <sub>2</sub> PtF <sub>6</sub>                               | 413.76  | 0.244 |
| mp-622602 | NaMoAsO <sub>6</sub>                                           | 7.265   | 0.079 |
| mp-621112 | Cs <sub>9</sub> Nb <sub>2</sub> S <sub>4</sub> Cl <sub>9</sub> | 395.289 | 0.07  |
| mp-28211  | IrS <sub>3</sub> Cl <sub>11</sub>                              | 11.228  | 0.049 |
| mp-607436 | ReCl <sub>3</sub> O <sub>2</sub>                               | 66.31   | 0.075 |
| mp-540998 | FeTeBr <sub>7</sub>                                            | 7.435   | 0.091 |
| mp-560578 | RbTeNO <sub>3</sub> F <sub>4</sub>                             | 12.553  | 0.084 |
| mp-29541  | GaTeI <sub>7</sub>                                             | 11.113  | 0.108 |
| mp-18997  | LiMnPO <sub>4</sub>                                            | 11.297  | 0.199 |
| mp-560515 | K <sub>4</sub> Ru <sub>2</sub> Cl <sub>10</sub> O              | 13.197  | 0.11  |
| mp-25305  | Y <sub>2</sub> Ti <sub>2</sub> S <sub>2</sub> O <sub>5</sub>   | 1000    | 0.412 |
| mp-554495 | CaZr(PO <sub>4</sub> ) <sub>2</sub>                            | 5.573   | 0.139 |
| mp-19123  | Rb <sub>2</sub> LiVO <sub>4</sub>                              | 9.373   | 0.085 |
| mp-554643 | K <sub>2</sub> SbSO <sub>4</sub> F <sub>3</sub>                | 82.175  | 0.115 |
| mp-570300 | MnTiCl <sub>3</sub>                                            | 236.563 | 0.188 |
| mp-20459  | TiPbO <sub>3</sub>                                             | 793.901 | 0.405 |

|           |                                                                                |         |       |
|-----------|--------------------------------------------------------------------------------|---------|-------|
| mp-4829   | Na <sub>2</sub> ThF <sub>6</sub>                                               | 39.647  | 0.192 |
| mp-540997 | FeTeCl <sub>7</sub>                                                            | 11.89   | 0.11  |
| mp-556609 | KSb(PS <sub>3</sub> ) <sub>2</sub>                                             | 7.627   | 0.125 |
| mp-557437 | KBi(PS <sub>3</sub> ) <sub>2</sub>                                             | 9.012   | 0.129 |
| mp-560692 | K <sub>4</sub> Nb <sub>6</sub> O <sub>17</sub>                                 | 33.636  | 0.124 |
| mp-9481   | TcS <sub>2</sub>                                                               | 9.836   | 0.182 |
| mp-30096  | Be <sub>2</sub> Te <sub>7</sub> Cl <sub>6</sub>                                | 6.875   | 0.125 |
| mp-644325 | CsFeSiO <sub>4</sub>                                                           | 5.512   | 0.13  |
| mp-18832  | K <sub>2</sub> VO <sub>2</sub> F <sub>3</sub>                                  | 13.439  | 0.157 |
| mp-568396 | Ba(FeBr <sub>4</sub> ) <sub>2</sub>                                            | 79.162  | 0.047 |
| mp-28232  | MgTi <sub>2</sub> O <sub>5</sub>                                               | 25.173  | 0.184 |
| mp-12885  | BaAl <sub>2</sub> Sb <sub>2</sub> O <sub>7</sub>                               | 13.359  | 0.259 |
| mp-505281 | CsSbS <sub>4</sub> (O <sub>3</sub> F) <sub>6</sub>                             | 8.507   | 0.052 |
| mp-571235 | ZrI <sub>4</sub>                                                               | 6.252   | 0.096 |
| mp-556637 | Ba <sub>6</sub> Na <sub>2</sub> Nb <sub>2</sub> P <sub>2</sub> O <sub>17</sub> | 184.842 | 0.229 |
| mp-27786  | SbAs <sub>2</sub> Cl <sub>13</sub>                                             | 6.452   | 0.043 |
| mp-555113 | Rb <sub>3</sub> Cu <sub>2</sub> (BiS <sub>2</sub> ) <sub>5</sub>               | 73.505  | 0.117 |
| mp-555131 | CsCO <sub>2</sub>                                                              | 7.292   | 0.095 |
| mp-698206 | Ba <sub>4</sub> Re <sub>3</sub> O <sub>16</sub>                                | 66.19   | 0.068 |
| mp-1707   | BaN <sub>6</sub>                                                               | 5.624   | 0.297 |
| mp-706632 | H <sub>15</sub> RhBr <sub>3</sub> N <sub>5</sub>                               | 5.962   | 0.095 |
| mp-616597 | ReHgO <sub>4</sub>                                                             | 14.447  | 0.24  |
| mp-571035 | OsCl <sub>4</sub>                                                              | 9.854   | 0.115 |
| mp-27147  | Rb <sub>3</sub> BiBr <sub>6</sub>                                              | 5.235   | 0.065 |
| mp-17512  | Zn(AuF <sub>4</sub> ) <sub>2</sub>                                             | 9.485   | 0.227 |
| mp-572597 | SbPS <sub>4</sub>                                                              | 10.754  | 0.092 |
| mp-644129 | KNiPH <sub>2</sub> O <sub>5</sub>                                              | 167.451 | 0.276 |
| mp-647366 | KICl <sub>4</sub>                                                              | 45.375  | 0.118 |
| mp-4758   | K <sub>2</sub> NbF <sub>7</sub>                                                | 129.918 | 0.098 |
| mp-3975   | K <sub>2</sub> TaF <sub>7</sub>                                                | 15.668  | 0.1   |
| mp-29144  | KTe <sub>2</sub> F <sub>9</sub>                                                | 26.798  | 0.165 |
| mp-8708   | Mg(AuF <sub>4</sub> ) <sub>2</sub>                                             | 70.156  | 0.234 |
| mp-864954 | MgMoN <sub>2</sub>                                                             | 186.497 | 1.046 |
| mp-27774  | NCIO <sub>6</sub>                                                              | 270.388 | 0.115 |
| mp-672248 | TaAsPCl <sub>13</sub>                                                          | 32.549  | 0.049 |
| mp-556631 | KZrSnF <sub>7</sub>                                                            | 28.112  | 0.152 |
| mp-19219  | Li <sub>3</sub> VO <sub>4</sub>                                                | 15.426  | 0.294 |
| mp-28719  | Ba(AuF <sub>4</sub> ) <sub>2</sub>                                             | 5.513   | 0.08  |
| mp-23444  | AsCl <sub>2</sub> F <sub>3</sub>                                               | 23.744  | 0.102 |
| mp-21724  | ZnSiPbO <sub>4</sub>                                                           | 96.555  | 0.189 |
| mp-560675 | K <sub>6</sub> Cu(SiO <sub>4</sub> ) <sub>2</sub>                              | 175.722 | 0.207 |
| mp-570962 | SbI <sub>3</sub> (BrCl <sub>3</sub> ) <sub>2</sub>                             | 5.358   | 0.15  |
| mp-561153 | XeF <sub>3</sub>                                                               | 10.884  | 0.165 |

|           |                                                                  |         |       |
|-----------|------------------------------------------------------------------|---------|-------|
| mp-685281 | TiZnH <sub>12</sub> (OF) <sub>6</sub>                            | 17.145  | 0.1   |
| mp-555741 | RbAu(SO <sub>4</sub> ) <sub>2</sub>                              | 45.343  | 0.385 |
| mp-560354 | SbCl(OF <sub>3</sub> ) <sub>2</sub>                              | 42.049  | 0.198 |
| mp-23576  | CsSbClF <sub>3</sub>                                             | 12.425  | 0.086 |
| mp-8716   | K <sub>2</sub> MnSe <sub>2</sub>                                 | 11.487  | 0.202 |
| mp-505814 | CsBa <sub>2</sub> Nb <sub>3</sub> O <sub>10</sub>                | 1000    | 0.521 |
| mp-556647 | Ba <sub>4</sub> Re <sub>3</sub> ClO <sub>15</sub>                | 6.71    | 0.079 |
| mp-505034 | Cs <sub>2</sub> MnS <sub>2</sub>                                 | 10.454  | 0.196 |
| mp-3237   | Na <sub>2</sub> CuF <sub>4</sub>                                 | 28.993  | 0.276 |
| mp-644827 | TePCL <sub>9</sub>                                               | 47.914  | 0.057 |
| mp-765493 | Ba <sub>2</sub> Sb <sub>2</sub> O <sub>5</sub>                   | 5.199   | 0.165 |
| mp-4002   | Li <sub>2</sub> ZrF <sub>6</sub>                                 | 8.607   | 0.402 |
| mp-554554 | K <sub>4</sub> Bi(PS <sub>4</sub> ) <sub>4</sub>                 | 46.437  | 0.102 |
| mp-542332 | K <sub>2</sub> Cu(CO <sub>3</sub> ) <sub>2</sub>                 | 12.132  | 0.122 |
| mp-541114 | Sr <sub>2</sub> RhF <sub>7</sub>                                 | 15.675  | 0.134 |
| mp-541134 | TeAuBr <sub>8</sub>                                              | 17.329  | 0.117 |
| mp-27987  | BrF <sub>5</sub>                                                 | 11.906  | 0.174 |
| mp-15472  | Ba <sub>4</sub> LiCu(CO <sub>3</sub> ) <sub>2</sub>              | 1000    | 0.264 |
| mp-679927 | Rb <sub>2</sub> Sc(NO <sub>3</sub> ) <sub>5</sub>                | 110.624 | 0.082 |
| mp-27307  | Na <sub>2</sub> ZrF <sub>6</sub>                                 | 38.877  | 0.29  |
| mp-561523 | NbTiCl <sub>4</sub> O                                            | 15.49   | 0.085 |
| mp-28575  | W(S <sub>4</sub> Cl <sub>3</sub> ) <sub>2</sub>                  | 1000    | 0.139 |
| mp-6841   | Ba <sub>4</sub> NaCu(CO <sub>3</sub> ) <sub>2</sub>              | 1000    | 0.264 |
| mp-555546 | MgAs <sub>2</sub> (XeF <sub>5</sub> ) <sub>4</sub>               | 6.311   | 0.068 |
| mp-645272 | TiV <sub>3</sub> (SeO <sub>6</sub> ) <sub>2</sub>                | 6.128   | 0.209 |
| mp-8713   | K <sub>2</sub> MnS <sub>2</sub>                                  | 6.876   | 0.241 |
| mp-8714   | Rb <sub>2</sub> MnS <sub>2</sub>                                 | 12.285  | 0.228 |
| mp-866688 | Cs <sub>4</sub> P <sub>2</sub> PdSe <sub>8</sub>                 | 6.072   | 0.092 |
| mp-9639   | BaCu(SeO <sub>3</sub> ) <sub>2</sub>                             | 30.499  | 0.211 |
| mp-7181   | CsSr <sub>2</sub> Ta <sub>3</sub> O <sub>10</sub>                | 1000    | 0.589 |
| mp-554805 | Sr <sub>3</sub> Se <sub>3</sub> (ClO <sub>4</sub> ) <sub>2</sub> | 28.802  | 0.143 |
| mp-504427 | Ti <sub>3</sub> PbO <sub>7</sub>                                 | 472.968 | 0.367 |
| mp-17559  | Y <sub>2</sub> TiO <sub>5</sub>                                  | 217.449 | 0.244 |
| mp-768915 | Na <sub>3</sub> AuO <sub>3</sub>                                 | 25.938  | 0.105 |
| mp-753353 | Sr <sub>4</sub> LiCu(CO <sub>3</sub> ) <sub>2</sub>              | 1000    | 0.306 |
| mp-18725  | YCrO <sub>3</sub>                                                | 8.167   | 0.323 |
| mp-28175  | Pd(SeCl <sub>3</sub> ) <sub>2</sub>                              | 14.895  | 0.065 |
| mp-19443  | WO <sub>3</sub>                                                  | 266.9   | 0.319 |
| mp-9640   | SrCu(SeO <sub>3</sub> ) <sub>2</sub>                             | 82.126  | 0.225 |
| mp-560005 | TlRe <sub>3</sub> (S <sub>2</sub> Cl) <sub>2</sub>               | 42.675  | 0.163 |
| mp-27921  | Ti <sub>2</sub> PCL <sub>13</sub>                                | 21.86   | 0.079 |
| mp-19453  | Te <sub>2</sub> MoO <sub>7</sub>                                 | 11.354  | 0.246 |
| mp-23207  | ClO <sub>2</sub>                                                 | 8.955   | 0.242 |



|           |                                                                 |         |       |
|-----------|-----------------------------------------------------------------|---------|-------|
| mp-680413 | Rb <sub>3</sub> As <sub>7</sub>                                 | 8.375   | 0.047 |
| mp-28179  | NaTaCl <sub>6</sub>                                             | 9.981   | 0.221 |
| mp-573373 | PICl <sub>8</sub>                                               | 18.014  | 0.068 |
| mp-560785 | K <sub>2</sub> Y <sub>4</sub> Sn <sub>2</sub> S <sub>11</sub>   | 762.479 | 0.134 |
| mp-17921  | NbSeOF <sub>7</sub>                                             | 112.453 | 0.167 |
| mp-556518 | K <sub>2</sub> Pd(NO <sub>3</sub> ) <sub>4</sub>                | 212.016 | 0.077 |
| mp-680329 | K <sub>3</sub> As <sub>7</sub>                                  | 12.073  | 0.051 |
| mp-540628 | Al(TeCl <sub>2</sub> ) <sub>2</sub>                             | 25.318  | 0.076 |
| mp-28174  | Pd(SCl <sub>3</sub> ) <sub>2</sub>                              | 6.364   | 0.34  |
| mp-559309 | K <sub>3</sub> ZnNCl <sub>4</sub> O <sub>3</sub>                | 11.085  | 0.109 |
| mp-767518 | Na <sub>2</sub> ScPCO <sub>7</sub>                              | 311.021 | 0.284 |
| mp-559568 | K <sub>2</sub> Se <sub>2</sub> O <sub>5</sub>                   | 17.689  | 0.096 |
| mp-773432 | KMnPCO <sub>7</sub>                                             | 496.408 | 0.319 |
| mp-505451 | HS <sub>9</sub> N                                               | 6.218   | 0.147 |
| mp-767722 | VFe(P <sub>2</sub> O <sub>7</sub> ) <sub>2</sub>                | 75.782  | 0.319 |
| mp-570229 | ThBr <sub>4</sub>                                               | 11.808  | 0.226 |
| mp-560715 | Sn <sub>4</sub> (PO <sub>5</sub> ) <sub>2</sub>                 | 17.242  | 0.223 |
| mp-17035  | K <sub>3</sub> Sc(PO <sub>4</sub> ) <sub>2</sub>                | 8.132   | 0.132 |
| mp-554948 | NaI(OF) <sub>2</sub>                                            | 104.11  | 0.196 |
| mp-27729  | ICl <sub>3</sub>                                                | 19.777  | 0.322 |
| mp-554160 | K <sub>2</sub> CuP <sub>2</sub> O <sub>7</sub>                  | 49.034  | 0.201 |
| mp-27169  | KTa <sub>4</sub> O <sub>13</sub>                                | 5.207   | 0.167 |
| mp-572149 | Cs <sub>2</sub> Al(NO <sub>3</sub> ) <sub>5</sub>               | 1000    | 0.094 |
| mp-679989 | Bi(Mo <sub>2</sub> Cl <sub>5</sub> ) <sub>3</sub>               | 62.816  | 0.063 |
| mp-28974  | TiF <sub>4</sub>                                                | 366.716 | 0.271 |
| mp-27514  | NaFeCl <sub>4</sub>                                             | 179.897 | 0.172 |
| mp-27322  | Nb <sub>2</sub> Te <sub>3</sub> O <sub>11</sub>                 | 33.37   | 0.327 |
| mp-9780   | RbHfAgTe <sub>3</sub>                                           | 18.509  | 0.279 |
| mp-554523 | TeBrO <sub>3</sub> F <sub>5</sub>                               | 12.865  | 0.301 |
| mp-696291 | ZnH <sub>4</sub> (NO <sub>4</sub> ) <sub>2</sub>                | 6.801   | 0.295 |
| mp-24030  | ZrP <sub>2</sub> (HO <sub>3</sub> ) <sub>2</sub>                | 12.471  | 0.403 |
| mp-556522 | K <sub>3</sub> Cu <sub>2</sub> (BiS <sub>2</sub> ) <sub>5</sub> | 16.823  | 0.183 |
| mp-29903  | TlTeF <sub>5</sub>                                              | 10.136  | 0.339 |
| mp-622258 | RbV <sub>2</sub> SbO <sub>8</sub>                               | 18.412  | 0.214 |
| mp-19496  | KV <sub>2</sub> SbO <sub>8</sub>                                | 16.962  | 0.219 |
| mp-560794 | BaNbTePO <sub>8</sub>                                           | 1000    | 0.206 |
| mp-29295  | Sr <sub>3</sub> Sb <sub>4</sub> S <sub>9</sub>                  | 9.105   | 0.163 |
| mp-769616 | Na <sub>2</sub> CrPCO <sub>7</sub>                              | 120.426 | 0.322 |
| mp-558121 | K <sub>4</sub> Ba(VS <sub>4</sub> ) <sub>2</sub>                | 34.669  | 0.121 |
| mp-570186 | Ga <sub>2</sub> Te <sub>2</sub> Br <sub>7</sub>                 | 694.027 | 0.096 |
| mp-557059 | RbSnS <sub>4</sub>                                              | 5.294   | 0.079 |
| mp-772763 | K <sub>2</sub> ScPCO <sub>7</sub>                               | 93.405  | 0.276 |
| mp-28189  | FeSeCl <sub>7</sub>                                             | 9.3     | 0.206 |

|           |                                                                                  |         |       |
|-----------|----------------------------------------------------------------------------------|---------|-------|
| mp-27664  | TiPCl <sub>9</sub>                                                               | 12.168  | 0.175 |
| mp-554432 | ReSbOF <sub>10</sub>                                                             | 286.947 | 0.197 |
| mp-29407  | AlTeI <sub>7</sub>                                                               | 6.761   | 0.207 |
| mp-775198 | Ti <sub>3</sub> P <sub>6</sub> WO <sub>24</sub>                                  | 1000    | 0.167 |
| mp-557856 | BCl(O <sub>F</sub> ) <sub>2</sub>                                                | 7.83    | 0.226 |
| mp-753401 | Sc <sub>2</sub> TiO <sub>5</sub>                                                 | 22.5    | 0.278 |
| mp-18815  | KVO <sub>3</sub>                                                                 | 8.549   | 0.359 |
| mp-31012  | K <sub>2</sub> (NbBr <sub>3</sub> ) <sub>3</sub>                                 | 43.286  | 0.058 |
| mp-14864  | Cs <sub>2</sub> Ti(PO <sub>4</sub> ) <sub>2</sub>                                | 34.738  | 0.16  |
| mp-8232   | BaZrF <sub>6</sub>                                                               | 15.071  | 0.125 |
| mp-23434  | Al <sub>2</sub> CuCl <sub>8</sub>                                                | 186.94  | 0.228 |
| mp-28387  | PAuCl <sub>8</sub>                                                               | 54.932  | 0.074 |
| mp-556705 | AsS(ClF <sub>2</sub> ) <sub>3</sub>                                              | 23.086  | 0.157 |
| mp-672338 | Cs(Bi <sub>2</sub> Te <sub>3</sub> ) <sub>2</sub>                                | 5.915   | 0.178 |
| mp-768140 | Na <sub>2</sub> BiPCO <sub>7</sub>                                               | 347.916 | 0.307 |
| mp-570857 | Y(AlCl <sub>4</sub> ) <sub>3</sub>                                               | 95.608  | 0.116 |
| mp-581834 | CsNa <sub>3</sub> (WN <sub>3</sub> ) <sub>2</sub>                                | 12.479  | 0.118 |
| mp-30938  | PAuS <sub>4</sub>                                                                | 10.98   | 0.304 |
| mp-622278 | TiV <sub>2</sub> SbO <sub>8</sub>                                                | 5.802   | 0.233 |
| mp-561328 | SbSe(BrF <sub>2</sub> ) <sub>3</sub>                                             | 10.342  | 0.146 |
| mp-571324 | CNCl                                                                             | 5.361   | 0.116 |
| mp-772808 | K <sub>2</sub> BiPCO <sub>7</sub>                                                | 10.175  | 0.277 |
| mp-27859  | SbI <sub>3</sub> F <sub>6</sub>                                                  | 38.61   | 0.175 |
| mp-27824  | PICl <sub>6</sub>                                                                | 15.48   | 0.122 |
| mp-769604 | K <sub>2</sub> MnPCO <sub>7</sub>                                                | 343.232 | 0.318 |
| mp-557260 | RbSb <sub>2</sub> F <sub>7</sub>                                                 | 240.128 | 0.204 |
| mp-558309 | K <sub>4</sub> SnSb <sub>2</sub> F <sub>14</sub>                                 | 11.31   | 0.262 |
| mp-16577  | Li <sub>2</sub> CaHfF <sub>8</sub>                                               | 132.548 | 0.456 |
| mp-720110 | KRe <sub>3</sub> Os <sub>3</sub> (Se <sub>4</sub> Cl <sub>3</sub> ) <sub>2</sub> | 1000    | 0.069 |
| mp-650228 | KIn(MoO <sub>4</sub> ) <sub>2</sub>                                              | 8.478   | 0.231 |
| mp-560591 | NaTi <sub>2</sub> Al <sub>5</sub> O <sub>12</sub>                                | 36.473  | 0.453 |
| mp-762082 | ThH <sub>10</sub> N <sub>4</sub> O <sub>17</sub>                                 | 11.524  | 0.102 |
| mp-667283 | Sr <sub>3</sub> Re <sub>3</sub> ClO <sub>15</sub>                                | 73.005  | 0.151 |
| mp-629690 | Bi <sub>2</sub> (PbS <sub>2</sub> ) <sub>3</sub>                                 | 24.657  | 0.22  |
| mp-542289 | HgNO <sub>3</sub>                                                                | 1000    | 0.22  |
| mp-720586 | CaH <sub>4</sub> NCIO <sub>5</sub>                                               | 184.93  | 0.206 |
| mp-680015 | Re <sub>3</sub> (SeBr) <sub>7</sub>                                              | 148.261 | 0.156 |
| mp-560120 | Na <sub>2</sub> Pd(NO <sub>3</sub> ) <sub>4</sub>                                | 41.464  | 0.216 |
| mp-556552 | K <sub>4</sub> VP <sub>2</sub> S <sub>9</sub>                                    | 31.774  | 0.141 |
| mp-6113   | LiTiAsO <sub>5</sub>                                                             | 20.565  | 0.247 |
| mp-7310   | ZrPbF <sub>6</sub>                                                               | 43.492  | 0.144 |
| mp-28536  | BaSe <sub>2</sub> O <sub>5</sub>                                                 | 10.981  | 0.228 |
| mp-22694  | LiPPbO <sub>4</sub>                                                              | 26.152  | 0.311 |

|           |                    |         |       |
|-----------|--------------------|---------|-------|
| mp-19459  | $K_2MgV_2O_7$      | 38.197  | 0.173 |
| mp-569653 | $SnPCl_9$          | 35.62   | 0.064 |
| mp-556210 | $Bi_2CO_5$         | 6.85    | 0.412 |
| mp-23598  | $SiO_3F$           | 10.375  | 0.182 |
| mp-560016 | $NaNb_2PO_8$       | 1000    | 0.334 |
| mp-27472  | $NbSbF_{10}$       | 296.273 | 0.292 |
| mp-13792  | $KTaP_4O_{13}$     | 105.003 | 0.206 |
| mp-554129 | $Br_3N(O_2F_5)_2$  | 87.93   | 0.164 |
| mp-27017  | $LiSnPO_4$         | 7.09    | 0.312 |
| mp-17101  | $CaNb_2O_6$        | 12.89   | 0.408 |
| mp-667345 | $NbTl_2PO_6$       | 785.295 | 0.186 |
| mp-559151 | $BaSrTa_2O_7$      | 1000    | 0.402 |
| mp-642792 | $BaBi_2(MoO_4)_4$  | 285.483 | 0.183 |
| mp-15750  | $TaAgP_4O_{13}$    | 10.954  | 0.212 |
| mp-540921 | $CsCuF_4$          | 5.731   | 0.322 |
| mp-647102 | $KNOF_2$           | 39.248  | 0.293 |
| mp-29408  | $AlSeBr_7$         | 9.956   | 0.299 |
| mp-29048  | $Sr(BiO_2)_2$      | 27.598  | 0.152 |
| mp-17953  | $MgNb_2O_6$        | 8.876   | 0.444 |
| mp-679984 | $Cs_4Ru_2Cl_{10}O$ | 215.367 | 0.089 |
| mp-722900 | $CaH_3NO_5$        | 73.369  | 0.104 |
| mp-19474  | $Ba_2V_2O_7$       | 43.321  | 0.239 |
| mp-562977 | $RbNbS_2O_9$       | 934.479 | 0.279 |
| mp-27788  | $TaPCl_{10}$       | 10.274  | 0.275 |
| mp-558938 | $Zn_4SiTePbO_{10}$ | 18.78   | 0.24  |
| mp-29194  | $Cs_2Au_2Se_3$     | 7.363   | 0.102 |
| mp-638424 | $Sb_2S_2O_9$       | 10.844  | 0.298 |
| mp-683984 | $Al(SeCl)_4$       | 123.78  | 0.094 |
| mp-29264  | $SiCl_7$           | 6.002   | 0.124 |
| mp-30003  | $AuSO_4$           | 22.006  | 0.182 |
| mp-768144 | $Na_2SbPCO_7$      | 12.285  | 0.369 |
| mp-559760 | $ScIO$             | 31.994  | 0.175 |
| mp-27780  | $TcCl_4$           | 18.311  | 0.199 |
| mp-555862 | $CsZr(NO_3)_5$     | 83.51   | 0.148 |
| mp-24656  | $YH_3(SO_4)_3$     | 86.48   | 0.119 |
| mp-541013 | $TiI_4$            | 89.537  | 0.117 |
| mp-29568  | $RuS_3Cl_8$        | 6.11    | 0.23  |
| mp-6764   | $BaSi_2(NO)_2$     | 21.379  | 0.538 |
| mp-555408 | $SbS_2IF_6$        | 16.221  | 0.132 |
| mp-28185  | $TaClF_8$          | 132.977 | 0.233 |
| mp-571313 | $Hf(SeCl_6)_2$     | 15.143  | 0.094 |
| mp-28330  | $TeAuCl_7$         | 33.706  | 0.232 |
| mp-5803   | $NbPO_5$           | 17.831  | 0.386 |

|           |                                                                                |         |       |
|-----------|--------------------------------------------------------------------------------|---------|-------|
| mp-5900   | Ba <sub>2</sub> ZrF <sub>8</sub>                                               | 87.531  | 0.255 |
| mp-4325   | Zr(SO <sub>4</sub> ) <sub>2</sub>                                              | 15.019  | 0.302 |
| mp-555490 | KRe <sub>2</sub> O <sub>4</sub> F <sub>7</sub>                                 | 27.503  | 0.48  |
| mp-29129  | K <sub>2</sub> Te <sub>2</sub> O <sub>5</sub>                                  | 7.037   | 0.173 |
| mp-649253 | NbClF <sub>8</sub>                                                             | 24.122  | 0.246 |
| mp-554147 | Rb <sub>2</sub> Nb <sub>2</sub> P <sub>2</sub> S <sub>11</sub>                 | 250.43  | 0.291 |
| mp-18964  | K <sub>3</sub> NaCr <sub>2</sub> O <sub>8</sub>                                | 15.89   | 0.245 |
| mp-557132 | Os <sub>2</sub> O <sub>3</sub> F <sub>7</sub>                                  | 97.799  | 0.251 |
| mp-28037  | Mo <sub>2</sub> SBr <sub>2</sub>                                               | 50.8    | 0.126 |
| mp-32311  | Re <sub>2</sub> NiO <sub>8</sub>                                               | 389.368 | 0.536 |
| mp-560208 | K <sub>3</sub> NbAs <sub>2</sub> O <sub>9</sub>                                | 395.894 | 0.344 |
| mp-558548 | Na <sub>3</sub> B <sub>6</sub> NO <sub>13</sub>                                | 41.075  | 0.196 |
| mp-531826 | Li <sub>2</sub> PtO <sub>3</sub>                                               | 8.765   | 0.326 |
| mp-554517 | NaMnF <sub>4</sub>                                                             | 5.441   | 0.539 |
| mp-30092  | TiCl <sub>4</sub>                                                              | 34.442  | 0.235 |
| mp-28870  | PRhO <sub>4</sub>                                                              | 5.719   | 0.23  |
| mp-743697 | MgZr <sub>3</sub> Tl <sub>10</sub> (MoO <sub>4</sub> ) <sub>12</sub>           | 66.332  | 0.154 |
| mp-27452  | Al <sub>2</sub> PdCl <sub>8</sub>                                              | 31.092  | 0.321 |
| mp-27308  | SbBrF <sub>8</sub>                                                             | 5.142   | 0.256 |
| mp-581922 | CsMo <sub>3</sub> Br <sub>3</sub> Cl <sub>4</sub>                              | 48.892  | 0.172 |
| mp-24144  | Na <sub>5</sub> ScH <sub>4</sub> (C <sub>2</sub> O <sub>7</sub> ) <sub>2</sub> | 1000    | 0.278 |
| mp-22869  | ClO <sub>3</sub>                                                               | 8.408   | 0.302 |
| mp-745150 | VZnHPbO <sub>5</sub>                                                           | 6.671   | 0.338 |
| mp-6539   | RbTiPO <sub>5</sub>                                                            | 13.095  | 0.229 |
| mp-555286 | CsNb(PO <sub>4</sub> ) <sub>2</sub>                                            | 18.872  | 0.341 |
| mp-556047 | K <sub>2</sub> OsCBr <sub>5</sub> O                                            | 73.933  | 0.202 |
| mp-560732 | BaNaZrF <sub>7</sub>                                                           | 36.255  | 0.312 |
| mp-27735  | GaSbCl <sub>6</sub>                                                            | 28.033  | 0.207 |
| mp-23623  | B <sub>3</sub> Pb <sub>2</sub> BrO <sub>9</sub>                                | 6.384   | 0.212 |
| mp-680446 | Cu <sub>3</sub> P <sub>4</sub> Se <sub>4</sub> Br <sub>3</sub>                 | 6.146   | 0.133 |
| mp-23396  | MoNCl <sub>3</sub>                                                             | 7.436   | 0.267 |
| mp-554412 | RbTa(PO <sub>4</sub> ) <sub>2</sub>                                            | 10.102  | 0.352 |
| mp-6278   | Zn <sub>2</sub> Cu(AsO <sub>4</sub> ) <sub>2</sub>                             | 7.232   | 0.636 |
| mp-5073   | RbNO <sub>3</sub>                                                              | 7.47    | 0.166 |
| mp-3247   | Cs <sub>2</sub> TiS <sub>3</sub>                                               | 16.997  | 0.144 |
| mp-23549  | Bi <sub>3</sub> B <sub>6</sub> O <sub>12</sub>                                 | 146.811 | 0.321 |
| mp-9856   | Cs <sub>2</sub> ZrSe <sub>3</sub>                                              | 6.837   | 0.13  |
| mp-28431  | Sb(IF <sub>3</sub> ) <sub>2</sub>                                              | 90.746  | 0.33  |
| mp-579086 | KSrNb <sub>2</sub> O <sub>6</sub> F                                            | 1000    | 0.551 |
| mp-562854 | CsNb <sub>2</sub> BiO <sub>7</sub>                                             | 1000    | 0.558 |
| mp-27935  | AlCl <sub>6</sub>                                                              | 15.817  | 0.25  |
| mp-686949 | ThCr(IO <sub>5</sub> ) <sub>2</sub>                                            | 20.08   | 0.245 |
| mp-571412 | RbNa <sub>3</sub> (WN <sub>3</sub> ) <sub>2</sub>                              | 21.525  | 0.176 |

|           |                                                                 |         |       |
|-----------|-----------------------------------------------------------------|---------|-------|
| mp-23376  | GaSeBr <sub>7</sub>                                             | 37.737  | 0.371 |
| mp-558521 | B <sub>2</sub> Se <sub>2</sub> O <sub>7</sub>                   | 6.774   | 0.287 |
| mp-28535  | Ca <sub>2</sub> Se <sub>3</sub> O <sub>8</sub>                  | 9.24    | 0.38  |
| mp-29114  | Re <sub>3</sub> Te <sub>4</sub> Cl <sub>5</sub>                 | 83.855  | 0.117 |
| mp-9172   | Li <sub>4</sub> TiO <sub>4</sub>                                | 11.561  | 0.306 |
| mp-505113 | TiSn <sub>6</sub> F <sub>16</sub>                               | 300.755 | 0.121 |
| mp-4674   | BNF <sub>8</sub>                                                | 6.725   | 0.179 |
| mp-558114 | Sr <sub>4</sub> NbAlO <sub>8</sub>                              | 708.633 | 0.423 |
| mp-28766  | K <sub>2</sub> TiS <sub>3</sub>                                 | 12.61   | 0.187 |
| mp-581217 | Cs <sub>2</sub> Nb <sub>4</sub> O <sub>11</sub>                 | 27.075  | 0.22  |
| mp-555512 | RbCO <sub>2</sub>                                               | 9.135   | 0.266 |
| mp-672212 | NaNb <sub>13</sub> O <sub>33</sub>                              | 18.392  | 0.405 |
| mp-28808  | TlReO <sub>4</sub>                                              | 5.645   | 0.227 |
| mp-557108 | Ba <sub>2</sub> Nb <sub>2</sub> TeO <sub>10</sub>               | 9.696   | 0.245 |
| mp-543046 | CsScP <sub>2</sub> (HO <sub>4</sub> ) <sub>2</sub>              | 29.905  | 0.36  |
| mp-559228 | Rb <sub>2</sub> HfS <sub>4</sub>                                | 7       | 0.278 |
| mp-654447 | Ni(XeF <sub>8</sub> ) <sub>2</sub>                              | 39.811  | 0.141 |
| mp-706995 | ZnCoH <sub>18</sub> N <sub>6</sub> Cl <sub>5</sub>              | 10.752  | 0.294 |
| mp-29419  | Hf(Te <sub>2</sub> Cl <sub>3</sub> ) <sub>2</sub>               | 5.746   | 0.381 |
| mp-757224 | Th <sub>4</sub> P <sub>6</sub> O <sub>23</sub>                  | 1000    | 0.245 |
| mp-6394   | RbTiAsO <sub>5</sub>                                            | 6.826   | 0.25  |
| mp-541353 | K <sub>2</sub> (TeS <sub>2</sub> ) <sub>3</sub>                 | 294.556 | 0.116 |
| mp-541740 | TaPO <sub>5</sub>                                               | 12.031  | 0.506 |
| mp-541956 | CsTiAsO <sub>5</sub>                                            | 6.063   | 0.246 |
| mp-6661   | BaTi(SiO <sub>3</sub> ) <sub>3</sub>                            | 67.8    | 0.475 |
| mp-30320  | RbHfF <sub>5</sub>                                              | 37.953  | 0.172 |
| mp-30213  | Sb <sub>2</sub> BrF <sub>15</sub>                               | 30.305  | 0.234 |
| mp-30946  | Ga <sub>2</sub> PdI <sub>8</sub>                                | 88.414  | 0.163 |
| mp-554111 | Ti <sub>3</sub> Tl <sub>3</sub> (PO <sub>4</sub> ) <sub>5</sub> | 16.901  | 0.196 |
| mp-557163 | TaPbF <sub>7</sub>                                              | 6.702   | 0.513 |
| mp-559519 | Na <sub>4</sub> TiAs <sub>2</sub> O <sub>9</sub>                | 246.875 | 0.162 |
| mp-561062 | NaSb <sub>3</sub> (PO <sub>5</sub> ) <sub>2</sub>               | 7.223   | 0.201 |
| mp-640883 | VBi(PbO <sub>3</sub> ) <sub>2</sub>                             | 8.868   | 0.422 |
| mp-27802  | BaSn <sub>2</sub> S <sub>3</sub>                                | 7.677   | 0.231 |
| mp-23809  | RbScBP <sub>2</sub> HO <sub>9</sub>                             | 83.277  | 0.423 |
| mp-19276  | BaMoO <sub>4</sub>                                              | 6.726   | 0.604 |
| mp-559516 | K <sub>3</sub> Nb(SO <sub>4</sub> ) <sub>4</sub>                | 47.768  | 0.186 |
| mp-21945  | Ge <sub>3</sub> Ru <sub>2</sub>                                 | 8.495   | 0.359 |
| mp-581864 | CsAsSe <sub>2</sub>                                             | 30.413  | 0.18  |
| mp-9308   | Li <sub>4</sub> ZrF <sub>8</sub>                                | 6.425   | 0.356 |
| mp-540629 | Al <sub>2</sub> Te <sub>2</sub> Cl <sub>7</sub>                 | 955.423 | 0.188 |
| mp-28358  | NbAlCl <sub>8</sub>                                             | 18.647  | 0.138 |
| mp-570544 | Zr(SeCl <sub>6</sub> ) <sub>2</sub>                             | 13.805  | 0.122 |



|           |                      |         |       |
|-----------|----------------------|---------|-------|
| mp-560331 | $K_2ZrS_4$           | 5.768   | 0.31  |
| mp-560021 | $AuS_3(O_3F)_3$      | 279.553 | 0.204 |
| mp-28845  | $OsO_3F_2$           | 17.789  | 0.669 |
| mp-28933  | $Br_2O_3$            | 8.73    | 0.266 |
| mp-735504 | $KVPHO_6$            | 1000    | 0.313 |
| mp-743636 | $NaNiP_2HO_7$        | 12.306  | 0.441 |
| mp-555321 | $BaNiF_4$            | 77.032  | 0.301 |
| mp-556341 | $Ti_4S_8Br_6O$       | 40.89   | 0.193 |
| mp-19512  | $BaV_2(PO_5)_2$      | 22.231  | 0.405 |
| mp-558160 | $NaYCO_3F_2$         | 13.614  | 0.447 |
| mp-19048  | $BaWO_4$             | 8.752   | 0.617 |
| mp-27349  | $BSF_7$              | 15.991  | 0.383 |
| mp-30159  | $AuBrF_6$            | 5.849   | 0.629 |
| mp-6268   | $KTiPO_5$            | 7.867   | 0.295 |
| mp-19134  | $CaCrP_2O_7$         | 172.673 | 0.534 |
| mp-556418 | $AlSCl_3O_2$         | 12.093  | 0.462 |
| mp-504957 | $RbReCl_4$           | 38.125  | 0.126 |
| mp-555678 | $Na_4Ti_5O_{12}$     | 14.804  | 0.836 |
| mp-19057  | $CaNiP_2O_7$         | 67.477  | 0.533 |
| mp-582648 | $RbRe_3Br_{10}$      | 52.746  | 0.122 |
| mp-6651   | $K_2Ta_2(OF_2)_3$    | 939.2   | 0.354 |
| mp-683967 | $Cd_7Te_4Cl_8O_{17}$ | 9.852   | 0.214 |
| mp-8851   | $BaCuP_2O_7$         | 13.388  | 0.537 |
| mp-19487  | $Ba_2Mn(PO_4)_2$     | 127.893 | 0.446 |
| mp-753945 | $ClOF_3$             | 11.59   | 0.533 |
| mp-18953  | $NaV(OF)_2$          | 286.651 | 0.921 |
| mp-19450  | $ScTi(MoO_4)_2$      | 7.219   | 0.718 |
| mp-16831  | $CaTi_4(PO_4)_6$     | 14.558  | 0.344 |
| mp-647342 | $SbP_3C(NCl_5)_3$    | 9.448   | 0.222 |
| mp-559283 | $TiSO_5$             | 439.127 | 0.373 |
| mp-556017 | $Th_2P_2O_9$         | 143.813 | 0.327 |
| mp-680356 | $ZrN_6O_{17}$        | 28.95   | 0.113 |
| mp-555580 | $SrZr_4(PO_4)_6$     | 16.932  | 0.328 |
| mp-562434 | $Cs_3Ta_5O_{14}$     | 12.357  | 0.393 |
| mp-556091 | $Cs_3Ta_2S_{11}$     | 56.443  | 0.226 |
| mp-542662 | $Ga_2Te_2Cl_7$       | 1000    | 0.21  |
| mp-555119 | $SrTaF_7$            | 34.287  | 0.61  |
| mp-560843 | $Na_4Zr_2Ti(CO_4)_4$ | 625.099 | 0.326 |
| mp-28672  | $Zr_2TeBr_{12}$      | 149.505 | 0.21  |
| mp-558660 | $Mg_2BiPO_6$         | 24.699  | 0.546 |
| mp-30945  | $Ga_2PdBr_8$         | 813.281 | 0.197 |
| mp-867334 | $KYGeS_4$            | 39.629  | 0.532 |
| mp-554379 | $AsXeF_{11}$         | 13.18   | 0.224 |

|           |                                                                    |         |       |
|-----------|--------------------------------------------------------------------|---------|-------|
| mp-6390   | Rb <sub>3</sub> Ti <sub>3</sub> (PO <sub>4</sub> ) <sub>5</sub>    | 37.59   | 0.242 |
| mp-4200   | ScPO <sub>4</sub>                                                  | 8.216   | 0.524 |
| mp-505088 | NbTe <sub>4</sub> I                                                | 6.129   | 0.196 |
| mp-770968 | Na <sub>3</sub> NiPCO <sub>7</sub>                                 | 53.23   | 0.701 |
| mp-569435 | KBi(PSe <sub>3</sub> ) <sub>2</sub>                                | 12.93   | 0.25  |
| mp-734042 | MgH <sub>12</sub> (NO <sub>6</sub> ) <sub>2</sub>                  | 15.861  | 0.293 |
| mp-561392 | TcSO <sub>4</sub> F                                                | 21.307  | 0.391 |
| mp-707060 | NbCl <sub>4</sub> F                                                | 51.804  | 0.313 |
| mp-5403   | Rb <sub>2</sub> TiO <sub>3</sub>                                   | 18.449  | 0.322 |
| mp-679999 | Re <sub>3</sub> (SeCl) <sub>7</sub>                                | 1000    | 0.183 |
| mp-758597 | K <sub>2</sub> TiSi <sub>3</sub> (HO <sub>5</sub> ) <sub>2</sub>   | 23.183  | 0.325 |
| mp-652776 | Rb <sub>2</sub> V(PO <sub>4</sub> ) <sub>2</sub>                   | 33.758  | 0.343 |
| mp-19075  | K <sub>2</sub> SrV <sub>4</sub> O <sub>12</sub>                    | 27.846  | 0.192 |
| mp-551826 | NbTiBr <sub>4</sub> O                                              | 128.59  | 0.429 |
| mp-29555  | MoBr <sub>2</sub>                                                  | 20.544  | 0.133 |
| mp-735530 | Ba <sub>2</sub> Fe <sub>3</sub> P <sub>4</sub> HO <sub>22</sub>    | 66.762  | 0.631 |
| mp-29498  | WBr <sub>2</sub>                                                   | 20.427  | 0.124 |
| mp-12177  | Te <sub>2</sub> O <sub>5</sub>                                     | 6.229   | 0.923 |
| mp-23808  | KScBP <sub>2</sub> HO <sub>9</sub>                                 | 33.476  | 0.541 |
| mp-23398  | BClF <sub>6</sub>                                                  | 30.661  | 0.452 |
| mp-541299 | Zr <sub>4</sub> Cd(PO <sub>4</sub> ) <sub>6</sub>                  | 16.69   | 0.349 |
| mp-40144  | SiNiH <sub>12</sub> (OF) <sub>6</sub>                              | 34.507  | 0.594 |
| mp-558894 | Ba <sub>4</sub> Ti <sub>2</sub> PtO <sub>10</sub>                  | 13.625  | 0.311 |
| mp-734194 | BeH <sub>4</sub> (IO <sub>5</sub> ) <sub>2</sub>                   | 6.869   | 0.418 |
| mp-18929  | BaV <sub>2</sub> O <sub>6</sub>                                    | 7.669   | 0.22  |
| mp-560742 | Ba <sub>2</sub> TeP <sub>2</sub> O <sub>9</sub>                    | 26.278  | 0.485 |
| mp-676448 | CsTiZnOF <sub>5</sub>                                              | 37.273  | 0.455 |
| mp-505234 | BaP <sub>2</sub> PbO <sub>7</sub>                                  | 15.311  | 0.474 |
| mp-19165  | BaFe(Si <sub>2</sub> O <sub>5</sub> ) <sub>2</sub>                 | 231.838 | 0.44  |
| mp-27854  | TaCl <sub>4</sub> F                                                | 84.639  | 0.145 |
| mp-647385 | V <sub>2</sub> Pb <sub>4</sub> O <sub>9</sub>                      | 16.72   | 0.284 |
| mp-696940 | TiH <sub>12</sub> C <sub>2</sub> (NF) <sub>6</sub>                 | 138.6   | 0.26  |
| mp-558235 | CaTaF <sub>7</sub>                                                 | 1000    | 0.214 |
| mp-723109 | BeH <sub>14</sub> (I <sub>2</sub> O <sub>9</sub> ) <sub>2</sub>    | 6.214   | 0.369 |
| mp-29085  | Sr <sub>2</sub> Zr <sub>3</sub> F <sub>22</sub>                    | 1000    | 0.314 |
| mp-18975  | Na <sub>2</sub> SrV <sub>4</sub> O <sub>12</sub>                   | 8.662   | 0.22  |
| mp-510018 | Rb <sub>2</sub> CuH <sub>12</sub> (SeO <sub>7</sub> ) <sub>2</sub> | 170.716 | 0.31  |
| mp-623854 | NaNb <sub>3</sub> O <sub>8</sub>                                   | 50.175  | 0.749 |
| mp-3368   | LiNb <sub>3</sub> O <sub>8</sub>                                   | 6.256   | 0.668 |
| mp-570531 | NbP <sub>2</sub> NCl <sub>12</sub>                                 | 8.892   | 0.209 |
| mp-696651 | K <sub>3</sub> NbHOF <sub>7</sub>                                  | 1000    | 0.203 |
| mp-561502 | Ba <sub>3</sub> B <sub>5</sub> N <sub>10</sub> F                   | 28.191  | 0.295 |
| mp-4609   | HfSiO <sub>4</sub>                                                 | 6.179   | 0.602 |

|           |                                                                |         |       |
|-----------|----------------------------------------------------------------|---------|-------|
| mp-620029 | MoCl <sub>2</sub>                                              | 32.989  | 0.163 |
| mp-573815 | ReI <sub>3</sub>                                               | 17.885  | 0.247 |
| mp-541236 | Na <sub>5</sub> HfAs <sub>3</sub>                              | 11.99   | 0.428 |
| mp-556442 | Tc <sub>2</sub> O <sub>5</sub> F <sub>4</sub>                  | 69.656  | 0.318 |
| mp-556587 | AuSCl <sub>7</sub>                                             | 54.996  | 0.301 |
| mp-707276 | TeH <sub>5</sub> SN <sub>2</sub> O <sub>5</sub> F <sub>3</sub> | 36.057  | 0.526 |
| mp-540946 | LiReO <sub>4</sub>                                             | 5.238   | 0.482 |
| mp-17892  | Ca <sub>2</sub> VN <sub>3</sub>                                | 23.525  | 0.471 |
| mp-541745 | Rb <sub>3</sub> Nb <sub>2</sub> S <sub>11</sub>                | 6.138   | 0.29  |
| mp-645687 | CsTi(PS <sub>4</sub> ) <sub>2</sub>                            | 25.612  | 0.182 |
| mp-12185  | LiCu(PO <sub>3</sub> ) <sub>3</sub>                            | 60.265  | 0.39  |
| mp-559115 | P <sub>2</sub> RhClF <sub>6</sub>                              | 11.489  | 0.257 |
| mp-567731 | Nb <sub>3</sub> Se <sub>10</sub> Br <sub>3</sub>               | 50.908  | 0.198 |
| mp-683918 | RbC <sub>2</sub> N <sub>3</sub>                                | 30.391  | 0.553 |
| mp-6488   | KTiAsO <sub>5</sub>                                            | 6.962   | 0.388 |
| mp-556139 | BaZr(PO <sub>4</sub> ) <sub>2</sub>                            | 9.963   | 0.606 |
| mp-17407  | Au <sub>3</sub> F <sub>8</sub>                                 | 21.838  | 0.467 |
| mp-761037 | Hg(ClO <sub>3</sub> ) <sub>2</sub>                             | 101.297 | 0.886 |
| mp-559493 | TiPCl <sub>5</sub> O                                           | 242.735 | 0.168 |
| mp-571011 | CsI <sub>4</sub>                                               | 20.275  | 0.31  |
| mp-758103 | YH <sub>2</sub> (CO <sub>3</sub> ) <sub>2</sub>                | 20.772  | 0.238 |
| mp-706630 | B <sub>5</sub> H <sub>7</sub>                                  | 35.634  | 0.404 |
| mp-27213  | AuBr <sub>3</sub>                                              | 127.051 | 0.208 |
| mp-24509  | CdH <sub>4</sub> (BrO <sub>4</sub> ) <sub>2</sub>              | 6.006   | 0.466 |
| mp-555122 | Rb <sub>2</sub> Pd(NO <sub>3</sub> ) <sub>4</sub>              | 96.017  | 0.445 |
| mp-676712 | ReSeCl                                                         | 9.598   | 0.173 |
| mp-540876 | KTh <sub>2</sub> (PO <sub>4</sub> ) <sub>3</sub>               | 13.684  | 0.237 |
| mp-706386 | ZrH <sub>6</sub> O <sub>3</sub> F <sub>4</sub>                 | 45.427  | 0.796 |
| mp-554280 | RbTh <sub>2</sub> (PO <sub>4</sub> ) <sub>3</sub>              | 12.969  | 0.235 |
| mp-541975 | Rb <sub>3</sub> Ta <sub>2</sub> S <sub>11</sub>                | 39.477  | 0.308 |
| mp-27556  | CsNbO <sub>3</sub>                                             | 11.536  | 0.348 |
| mp-685352 | Ca <sub>2</sub> NF                                             | 1000    | 0.339 |
| mp-570966 | ZrP <sub>2</sub> NCl <sub>11</sub>                             | 25.921  | 0.137 |
| mp-867268 | K <sub>4</sub> P <sub>2</sub> PdS <sub>8</sub>                 | 9.275   | 0.675 |
| mp-23334  | Bi <sub>2</sub> TeO <sub>5</sub>                               | 20.322  | 0.324 |
| mp-27245  | BSBr                                                           | 58.145  | 0.492 |
| mp-556024 | Na <sub>2</sub> TiF <sub>6</sub>                               | 199.041 | 0.402 |
| mp-557432 | GeClO <sub>2</sub> F <sub>5</sub>                              | 161.877 | 0.263 |
| mp-5450   | K <sub>2</sub> ZrF <sub>6</sub>                                | 64.108  | 0.4   |
| mp-28985  | SbSeCl <sub>9</sub>                                            | 6.182   | 0.301 |
| mp-555272 | Na <sub>5</sub> Zr <sub>2</sub> F <sub>13</sub>                | 26.773  | 0.475 |
| mp-567424 | K <sub>3</sub> NbAs <sub>3</sub> Pb                            | 8.334   | 0.107 |
| mp-573429 | Cs <sub>5</sub> Bi(MoO <sub>4</sub> ) <sub>4</sub>             | 28.052  | 0.376 |

|           |                                                               |         |       |
|-----------|---------------------------------------------------------------|---------|-------|
| mp-560407 | $\text{KNbSi}_2\text{O}_7$                                    | 12.803  | 0.405 |
| mp-559118 | $\text{CsTa}(\text{PO}_4)_2$                                  | 13.579  | 0.7   |
| mp-583297 | $\text{Ba}_8\text{Nb}_4\text{S}_{13}\text{O}_3$               | 5.59    | 0.293 |
| mp-530262 | $\text{Li}_{15}\text{Cr}_2\text{N}_9$                         | 9.747   | 0.36  |
| mp-554605 | $\text{Rb}_2\text{SbCl}_3\text{F}_2$                          | 630.109 | 0.672 |
| mp-29794  | $\text{Ba}_2\text{PdF}_6$                                     | 111.318 | 0.305 |
| mp-5996   | $\text{Na}_2\text{Ti}_2\text{Si}_2\text{O}_9$                 | 20.544  | 0.715 |
| mp-19034  | $\text{Mg}_3\text{V}_2\text{O}_8$                             | 6.85    | 0.47  |
| mp-6456   | $\text{LiNbGeO}_5$                                            | 14.56   | 0.648 |
| mp-570248 | $\text{NaC}_2\text{N}_3$                                      | 107.041 | 0.393 |
| mp-620652 | $\text{NaSr}_2\text{AlP}_3$                                   | 48.767  | 0.28  |
| mp-557599 | $\text{Rb}_2\text{Bi}(\text{ClO}_4)_5$                        | 18.993  | 0.402 |
| mp-572864 | $\text{Rb}_5\text{Th}(\text{PS}_4)_3$                         | 5.663   | 0.258 |
| mp-559530 | $\text{Ti}_5(\text{PO}_5)_4$                                  | 10.715  | 0.347 |
| mp-17803  | $\text{Nb}_2\text{Ti}_4\text{S}_{11}$                         | 6.075   | 0.462 |
| mp-27998  | $\text{KNb}_3\text{O}_8$                                      | 143.122 | 0.414 |
| mp-505564 | $\text{Bi}_2\text{Se}_4\text{Cl}_7$                           | 150.112 | 0.303 |
| mp-540668 | $\text{BS}_2$                                                 | 54.712  | 0.718 |
| mp-3033   | $\text{RbTaO}_3$                                              | 10.27   | 0.419 |
| mp-556548 | $\text{Bi}(\text{BO}_2)_3$                                    | 10.168  | 1.159 |
| mp-677002 | $\text{SrZr}_{12}\text{B}_2\text{I}_5\text{Cl}_{23}$          | 366.301 | 0.2   |
| mp-27880  | $\text{Nb}_3\text{Cl}_7$                                      | 25.236  | 0.195 |
| mp-3488   | $\text{Na}_2\text{Ti}_3\text{O}_7$                            | 1000    | 1.075 |
| mp-532604 | $\text{Na}_2\text{Zr}_{12}\text{B}_2\text{I}_5\text{Cl}_{23}$ | 42.797  | 0.202 |
| mp-707483 | $\text{TiP}_2\text{H}_4\text{O}_9$                            | 1000    | 0.801 |
| mp-14873  | $\text{K}_4\text{Nb}_8\text{Si}(\text{P}_2\text{O}_{17})_2$   | 5.79    | 0.306 |
| mp-29282  | $\text{P}_2\text{PtO}_7$                                      | 25.781  | 0.621 |
| mp-560767 | $\text{KNaTiO}_3$                                             | 14.556  | 0.559 |
| mp-6228   | $\text{Na}_2\text{TiGeO}_5$                                   | 8.632   | 0.804 |
| mp-560977 | $\text{KTiPS}_5$                                              | 18.466  | 0.295 |
| mp-554195 | $\text{Sb}_3\text{As}_2\text{S}_{14}(\text{IF}_9)_3$          | 306.889 | 0.482 |
| mp-510036 | $\text{Fe}_2\text{Cu}(\text{P}_2\text{O}_7)_2$                | 7.064   | 1.093 |
| mp-29412  | $\text{Ta}_3\text{Br}_7$                                      | 7.027   | 0.177 |
| mp-29051  | $\text{WS}_4\text{Cl}_4$                                      | 106.92  | 0.137 |
| mp-559281 | $\text{Na}_3\text{Cr}_2(\text{PS}_4)_3$                       | 11.253  | 0.358 |
| mp-561518 | $\text{Mg}_2\text{BiAsO}_6$                                   | 27.563  | 0.39  |
| mp-744625 | $\text{ZnCrH}_{15}\text{N}_9\text{Cl}_4\text{F}$              | 24.275  | 0.275 |
| mp-17499  | $\text{K}_7\text{Nb}(\text{SO}_4)_6$                          | 22.554  | 0.19  |
| mp-28903  | $\text{Zr}_8\text{FeCl}_{14}$                                 | 9.712   | 0.208 |
| mp-769319 | $\text{LiNb}(\text{OF})_2$                                    | 14.717  | 1.044 |
| mp-15004  | $\text{Ca}_3\text{ZrSi}_2\text{O}_9$                          | 13.591  | 0.516 |
| mp-27212  | $\text{Sb}_2\text{IF}_{15}$                                   | 15.954  | 0.302 |
| mp-667426 | $\text{Bi}_2\text{Te}_2\text{O}_7$                            | 6.14    | 0.324 |

|           |                                                                                  |         |       |
|-----------|----------------------------------------------------------------------------------|---------|-------|
| mp-28481  | Ti(ClO <sub>4</sub> ) <sub>4</sub>                                               | 997.878 | 0.381 |
| mp-735541 | NiSn <sub>2</sub> H <sub>12</sub> (OF) <sub>6</sub>                              | 11.028  | 0.901 |
| mp-558244 | As(IF <sub>3</sub> ) <sub>2</sub>                                                | 288.427 | 0.307 |
| mp-19179  | Ba <sub>2</sub> V(SiO <sub>4</sub> ) <sub>2</sub>                                | 579.592 | 0.548 |
| mp-745159 | MoPH <sub>3</sub> O <sub>7</sub>                                                 | 12.897  | 0.927 |
| mp-6138   | Na <sub>2</sub> TiSiO <sub>5</sub>                                               | 9.441   | 0.953 |
| mp-541947 | Rb <sub>2</sub> Th(PSe <sub>3</sub> ) <sub>3</sub>                               | 8.584   | 0.373 |
| mp-745166 | Sr <sub>2</sub> Fe <sub>2</sub> H <sub>2</sub> O <sub>F</sub> <sub>10</sub>      | 681.484 | 0.269 |
| mp-18935  | K <sub>2</sub> V(PO <sub>4</sub> ) <sub>2</sub>                                  | 85.85   | 0.583 |
| mp-27697  | ThI <sub>4</sub>                                                                 | 6.776   | 0.654 |
| mp-704408 | K <sub>8</sub> V <sub>2</sub> (S <sub>2</sub> O <sub>9</sub> ) <sub>3</sub>      | 1000    | 0.214 |
| mp-17455  | K <sub>7</sub> Ta(SO <sub>4</sub> ) <sub>6</sub>                                 | 27.06   | 0.203 |
| mp-16055  | KLi <sub>3</sub> Zr <sub>2</sub> (Si <sub>2</sub> O <sub>5</sub> ) <sub>6</sub>  | 56.244  | 0.459 |
| mp-28085  | KAs <sub>2</sub> F <sub>7</sub>                                                  | 23.872  | 0.645 |
| mp-581868 | NaY(IO <sub>3</sub> ) <sub>4</sub>                                               | 12.684  | 0.242 |
| mp-6081   | Ba <sub>2</sub> Ti(SiO <sub>4</sub> ) <sub>2</sub>                               | 461.582 | 0.576 |
| mp-18687  | NbF <sub>5</sub>                                                                 | 128.531 | 0.287 |
| mp-28346  | SrSe <sub>2</sub> O <sub>5</sub>                                                 | 5.266   | 0.884 |
| mp-628908 | KICl <sub>2</sub>                                                                | 5.281   | 0.455 |
| mp-755663 | Ta <sub>2</sub> Pb <sub>2</sub> O <sub>7</sub>                                   | 5.708   | 0.395 |
| mp-556615 | CaBi <sub>4</sub> (PO <sub>3</sub> ) <sub>4</sub>                                | 6.365   | 0.889 |
| mp-23307  | NbCl <sub>5</sub>                                                                | 32.447  | 0.119 |
| mp-3180   | Ta <sub>2</sub> Te <sub>2</sub> O <sub>9</sub>                                   | 5.927   | 0.792 |
| mp-559894 | Sb <sub>2</sub> Te <sub>2</sub> O <sub>9</sub>                                   | 27.64   | 0.615 |
| mp-542148 | Sb <sub>2</sub> N <sub>5</sub> F <sub>11</sub>                                   | 663.868 | 0.308 |
| mp-6708   | RbNb <sub>2</sub> PS <sub>10</sub>                                               | 7.486   | 0.824 |
| mp-560519 | Ba <sub>3</sub> ScCO <sub>3</sub> F <sub>7</sub>                                 | 23.06   | 0.287 |
| mp-555305 | NaNb(OF) <sub>2</sub>                                                            | 107.382 | 1.081 |
| mp-745012 | Ni <sub>2</sub> P <sub>2</sub> O <sub>7</sub>                                    | 7.465   | 0.826 |
| mp-677416 | Na <sub>5</sub> Mg <sub>5</sub> In <sub>3</sub> (SO <sub>4</sub> ) <sub>12</sub> | 39.732  | 0.666 |
| mp-667305 | ReN(OF <sub>2</sub> ) <sub>3</sub>                                               | 832.88  | 0.423 |
| mp-556902 | KLi <sub>4</sub> NbO <sub>5</sub>                                                | 5.277   | 1.549 |
| mp-7601   | NbGaO <sub>4</sub>                                                               | 11.309  | 0.961 |
| mp-680298 | Rb <sub>3</sub> Ta <sub>5</sub> O <sub>14</sub>                                  | 20.973  | 0.424 |
| mp-778433 | Li <sub>3</sub> Cr <sub>2</sub> (PS <sub>4</sub> ) <sub>3</sub>                  | 6.825   | 0.476 |
| mp-558054 | SrLi <sub>2</sub> Ta <sub>2</sub> O <sub>7</sub>                                 | 811.809 | 0.459 |
| mp-24196  | Tl <sub>2</sub> CuH <sub>12</sub> (SO <sub>3</sub> ) <sub>2</sub>                | 266.874 | 0.609 |
| mp-557171 | Na <sub>2</sub> Cu(PO <sub>3</sub> ) <sub>4</sub>                                | 722.379 | 0.375 |
| mp-765597 | HS <sub>2</sub> IO <sub>8</sub>                                                  | 45.397  | 0.775 |
| mp-567414 | BiAuCl <sub>6</sub>                                                              | 1000    | 0.715 |
| mp-680756 | Na <sub>4</sub> TiP <sub>2</sub> O <sub>9</sub>                                  | 463.63  | 0.479 |
| mp-654301 | Nb <sub>5</sub> P <sub>3</sub> O <sub>30</sub>                                   | 100.831 | 0.613 |
| mp-561197 | TaF <sub>5</sub>                                                                 | 66.33   | 0.34  |

|           |                                                                                  |         |       |
|-----------|----------------------------------------------------------------------------------|---------|-------|
| mp-752443 | Te(S <sub>2</sub> O) <sub>2</sub>                                                | 5.521   | 1.043 |
| mp-29426  | Y <sub>5</sub> C <sub>2</sub> I <sub>9</sub>                                     | 177.827 | 0.264 |
| mp-570193 | NaAuCl <sub>4</sub>                                                              | 5.481   | 0.391 |
| mp-18914  | K <sub>2</sub> MoO <sub>4</sub>                                                  | 258.979 | 0.658 |
| mp-557441 | KAu(IO <sub>3</sub> ) <sub>4</sub>                                               | 13.694  | 1.302 |
| mp-18827  | AlVO <sub>4</sub>                                                                | 15.685  | 1.001 |
| mp-675651 | MgPS <sub>3</sub>                                                                | 5.487   | 0.807 |
| mp-18743  | CaMnP <sub>2</sub> O <sub>7</sub>                                                | 44.716  | 1.217 |
| mp-557628 | AsS(IF <sub>3</sub> ) <sub>2</sub>                                               | 62.65   | 0.407 |
| mp-23403  | SbIF <sub>5</sub>                                                                | 1000    | 0.364 |
| mp-554572 | K <sub>3</sub> NbP <sub>2</sub> O <sub>9</sub>                                   | 635.167 | 0.545 |
| mp-676801 | K <sub>7</sub> Th <sub>6</sub> F <sub>31</sub>                                   | 80.922  | 0.249 |
| mp-27927  | NbAlO <sub>4</sub>                                                               | 39.586  | 1.107 |
| mp-29831  | TaCl <sub>5</sub>                                                                | 32.357  | 0.155 |
| mp-30142  | Be <sub>4</sub> N <sub>6</sub> O <sub>19</sub>                                   | 362.601 | 0.309 |
| mp-28030  | Li <sub>4</sub> Nb <sub>2</sub> O <sub>9</sub>                                   | 15.153  | 1.089 |
| mp-30097  | Bi <sub>2</sub> TeCl <sub>8</sub>                                                | 212.124 | 0.746 |
| mp-28778  | KScF <sub>4</sub>                                                                | 1000    | 0.818 |
| mp-683955 | KTaPS <sub>6</sub>                                                               | 12.234  | 0.226 |
| mp-720104 | Na <sub>4</sub> Al <sub>3</sub> Ge <sub>3</sub> NO <sub>14</sub>                 | 95.99   | 0.331 |
| mp-26949  | LiSn <sub>2</sub> (PO <sub>3</sub> ) <sub>5</sub>                                | 5.568   | 1.047 |
| mp-555424 | CaNb <sub>2</sub> (P <sub>2</sub> O <sub>7</sub> ) <sub>3</sub>                  | 1000    | 0.39  |
| mp-14333  | TaAlO <sub>4</sub>                                                               | 13.275  | 1.222 |
| mp-569175 | ZrCl <sub>4</sub>                                                                | 44.209  | 1.178 |
| mp-13627  | Y <sub>3</sub> ReO <sub>8</sub>                                                  | 7.378   | 1.324 |
| mp-648414 | V <sub>2</sub> PS <sub>10</sub>                                                  | 33.555  | 0.621 |
| mp-555085 | KAu(NO <sub>3</sub> ) <sub>4</sub>                                               | 853.289 | 0.917 |
| mp-572794 | ReP(Cl <sub>2</sub> O) <sub>3</sub>                                              | 223.628 | 0.698 |
| mp-768674 | Cs <sub>4</sub> Zr <sub>3</sub> Se <sub>14</sub>                                 | 19.411  | 0.3   |
| mp-546285 | NbI <sub>3</sub> O                                                               | 7.646   | 1.072 |
| mp-10499  | LiZr <sub>2</sub> (PO <sub>4</sub> ) <sub>3</sub>                                | 13.468  | 0.752 |
| mp-556719 | K <sub>2</sub> Ti(SiO <sub>3</sub> ) <sub>3</sub>                                | 7       | 0.689 |
| mp-558692 | Sb <sub>2</sub> ClO <sub>2</sub> F <sub>11</sub>                                 | 278.963 | 0.755 |
| mp-707219 | K <sub>2</sub> Zr <sub>2</sub> ZnH <sub>12</sub> (OF <sub>2</sub> ) <sub>6</sub> | 736.939 | 0.931 |
| mp-542013 | Rb <sub>4</sub> Zr <sub>3</sub> Se <sub>14</sub>                                 | 16.964  | 0.328 |
| mp-554376 | Y <sub>4</sub> TiSi <sub>2</sub> (O <sub>3</sub> F <sub>2</sub> ) <sub>3</sub>   | 1000    | 0.397 |
| mp-573751 | AlTeCl <sub>7</sub>                                                              | 7.102   | 0.765 |
| mp-23089  | SrTa <sub>2</sub> Bi <sub>2</sub> O <sub>9</sub>                                 | 102.905 | 0.447 |
| mp-23614  | SrNb <sub>2</sub> Bi <sub>2</sub> O <sub>9</sub>                                 | 140.741 | 0.454 |
| mp-559314 | Na <sub>5</sub> TiP <sub>2</sub> O <sub>9</sub> F                                | 666.72  | 0.495 |
| mp-540995 | Rb <sub>5</sub> Nb <sub>3</sub> OF <sub>18</sub>                                 | 1000    | 0.259 |
| mp-707343 | ZrH <sub>12</sub> C <sub>2</sub> (NF) <sub>6</sub>                               | 544.421 | 1.041 |
| mp-27184  | B <sub>10</sub> (Pb <sub>2</sub> O <sub>7</sub> ) <sub>3</sub>                   | 14.465  | 1.533 |

|           |                                                                               |         |       |
|-----------|-------------------------------------------------------------------------------|---------|-------|
| mp-23929  | ZnH <sub>8</sub> (NO <sub>3</sub> ) <sub>2</sub>                              | 1000    | 0.447 |
| mp-707981 | Y <sub>4</sub> H <sub>9</sub> NO <sub>13</sub>                                | 210.047 | 1.104 |
| mp-541867 | CsRe <sub>3</sub> (O <sub>3</sub> F <sub>5</sub> ) <sub>2</sub>               | 286.69  | 0.892 |
| mp-29040  | Li <sub>3</sub> Zr <sub>4</sub> F <sub>19</sub>                               | 268.491 | 1.136 |
| mp-6571   | BaCuAs <sub>2</sub> O <sub>7</sub>                                            | 7.518   | 1.318 |
| mp-549720 | NbI <sub>2</sub> O                                                            | 48.468  | 1.077 |
| mp-18271  | Na <sub>5</sub> Ti <sub>2</sub> Si <sub>2</sub> PO <sub>13</sub>              | 831.071 | 1.732 |
| mp-540675 | SeCl <sub>4</sub>                                                             | 14.603  | 0.408 |
| mp-559692 | Ta <sub>2</sub> Cd(P <sub>2</sub> O <sub>7</sub> ) <sub>3</sub>               | 6.393   | 0.597 |
| mp-556697 | CaTa <sub>2</sub> Bi <sub>2</sub> O <sub>9</sub>                              | 16.386  | 0.493 |
| mp-541735 | K <sub>4</sub> Ti <sub>3</sub> S <sub>14</sub>                                | 22.788  | 0.416 |
| mp-5274   | ThTi <sub>2</sub> O <sub>6</sub>                                              | 16.951  | 1.792 |
| mp-561396 | Li <sub>3</sub> CrF <sub>6</sub>                                              | 23.7    | 0.551 |
| mp-723419 | Sb <sub>2</sub> S <sub>19</sub> F <sub>12</sub>                               | 29.264  | 0.355 |
| mp-672352 | Al(ICl <sub>2</sub> ) <sub>3</sub>                                            | 29.304  | 0.346 |
| mp-542121 | Rb <sub>4</sub> Nb <sub>2</sub> Si <sub>6</sub> O <sub>23</sub>               | 239.444 | 1.336 |
| mp-559000 | SbSe <sub>6</sub> F <sub>6</sub>                                              | 7.999   | 1.079 |
| mp-557256 | RbP <sub>3</sub> PbO <sub>9</sub>                                             | 7.55    | 0.575 |
| mp-680246 | Cs <sub>4</sub> Zr <sub>3</sub> S <sub>14</sub>                               | 18.488  | 0.387 |
| mp-752467 | NbO <sub>2</sub> F                                                            | 18.971  | 1.412 |
| mp-542067 | Rb <sub>4</sub> Ti <sub>3</sub> S <sub>14</sub>                               | 24.197  | 0.429 |
| mp-762295 | K <sub>2</sub> Mn <sub>3</sub> V <sub>2</sub> (HO <sub>3</sub> ) <sub>2</sub> | 8.655   | 0.875 |
| mp-22583  | KInP <sub>2</sub> S <sub>7</sub>                                              | 6.417   | 0.88  |
| mp-558360 | AlAs <sub>3</sub> S <sub>5</sub> Cl <sub>4</sub>                              | 16.729  | 1.25  |
| mp-28774  | KSnF <sub>3</sub>                                                             | 5.689   | 0.975 |
| mp-560745 | AuN <sub>3</sub> O <sub>14</sub>                                              | 91.854  | 1.168 |
| mp-557786 | CaNb <sub>2</sub> P <sub>2</sub> O <sub>11</sub>                              | 12.536  | 0.469 |
| mp-680284 | Rb <sub>6</sub> Ta <sub>4</sub> S <sub>25</sub>                               | 12.145  | 0.261 |
| mp-31003  | B <sub>10</sub> H <sub>13</sub> I                                             | 26.178  | 0.443 |
| mp-707782 | K <sub>6</sub> Zr <sub>3</sub> H <sub>4</sub> (OF) <sub>12</sub>              | 48.215  | 0.516 |
| mp-571250 | TaP <sub>2</sub> Se <sub>2</sub> Cl <sub>5</sub>                              | 54.341  | 0.907 |
| mp-556728 | TaP <sub>2</sub> S <sub>2</sub> Cl <sub>5</sub>                               | 110.898 | 0.936 |
| mp-556834 | RuCl(OF <sub>3</sub> ) <sub>2</sub>                                           | 71.407  | 1.912 |
| mp-505400 | BaZr <sub>2</sub> F <sub>10</sub>                                             | 210.074 | 0.82  |
| mp-559182 | P <sub>2</sub> IrClF <sub>6</sub>                                             | 49.455  | 0.72  |
| mp-554016 | K <sub>4</sub> Ti <sub>2</sub> PO <sub>4</sub> F <sub>9</sub>                 | 1000    | 1.229 |
| mp-560322 | K <sub>2</sub> RuN <sub>3</sub> Cl <sub>3</sub> O <sub>5</sub>                | 619.235 | 1.494 |
| mp-530524 | Zr <sub>3</sub> TiF <sub>15</sub>                                             | 41.929  | 1.293 |
| mp-645364 | Sr(PN <sub>2</sub> ) <sub>2</sub>                                             | 13.411  | 0.333 |
| mp-27994  | HgBrO <sub>3</sub>                                                            | 6.458   | 0.948 |
| mp-567515 | Rb <sub>2</sub> Hg <sub>2</sub> PdBr <sub>8</sub>                             | 19.514  | 1.01  |
| mp-560297 | LiTaSiO <sub>5</sub>                                                          | 7.34    | 1.526 |
| mp-8796   | Sr <sub>2</sub> LiSc(B <sub>2</sub> O <sub>5</sub> ) <sub>2</sub>             | 9.845   | 1.371 |

|           |                           |         |       |
|-----------|---------------------------|---------|-------|
| mp-680410 | $K_3Nb_2S_{11}$           | 5.78    | 0.333 |
| mp-557470 | $K_2Sb_2S(O_2F_3)_2$      | 10.262  | 1.773 |
| mp-557301 | $K_2Ti(Si_2O_5)_3$        | 515.602 | 1.043 |
| mp-542863 | $Ca_7NbSi_4O_{17}F$       | 752.817 | 1.229 |
| mp-569561 | $TeCl_4$                  | 8.249   | 0.513 |
| mp-561454 | $KAu(SO_4)_2$             | 85.428  | 1.149 |
| mp-19440  | $LiVO_3$                  | 28.172  | 0.844 |
| mp-769404 | $YSeO_3$                  | 77.611  | 1.308 |
| mp-30996  | $RbAuBr_4$                | 15.044  | 2.149 |
| mp-24522  | $CuH_2SO_5$               | 10.268  | 3.727 |
| mp-560032 | $NaNb_2AsO_8$             | 5.251   | 2.276 |
| mp-30930  | $AlI_3$                   | 8.877   | 1.683 |
| mp-27926  | $AsClF_8$                 | 21.765  | 1.509 |
| mp-676501 | $K_3Sn_2S_3BrO_{12}$      | 961.711 | 1.289 |
| mp-16691  | $SrLi_2Ti_6O_{14}$        | 5.899   | 0.535 |
| mp-640341 | $Mo_3S_4Cl_4$             | 8.736   | 0.908 |
| mp-27300  | $RbAuBr_3$                | 197.527 | 1.113 |
| mp-27678  | $Y_2Cl_3$                 | 22.792  | 1.798 |
| mp-756570 | $Rb_4SnO_3$               | 27.911  | 0.791 |
| mp-849433 | $SrTiH_4(OF_3)_2$         | 42.834  | 1.816 |
| mp-13361  | $Cd_2Cu(PO_4)_2$          | 72.015  | 4.315 |
| mp-532315 | $Sr_{17}(Ta_5S_{21})_2$   | 31.146  | 0.787 |
| mp-667369 | $Ca_2Zr_5Ti_2O_{16}$      | 7.519   | 0.741 |
| mp-23569  | $AsSe_4IF_6$              | 5.224   | 1.813 |
| mp-541240 | $Sb_3O_2F_5$              | 19.142  | 2.039 |
| mp-626799 | $ReH_3O_5$                | 5.39    | 3.158 |
| mp-15543  | $NaLiZr(Si_2O_5)_3$       | 36.614  | 0.466 |
| mp-19432  | $KNaV_2O_6$               | 13.294  | 1.097 |
| mp-3283   | $RbNbO_3$                 | 15.27   | 2.752 |
| mp-24215  | $ScH_3Br_3N$              | 13.604  | 1.784 |
| mp-29704  | $Cs(SO_2)_2$              | 282.641 | 1.001 |
| mp-554737 | $CsAu_2F_7$               | 29.952  | 0.995 |
| mp-505260 | $Te_{10}Mo_3I_{10}$       | 5.745   | 1.187 |
| mp-21533  | $CuP_2PbO_7$              | 50.136  | 2.834 |
| mp-568252 | $Rb_2Hg_2PdCl_8$          | 48.555  | 1.637 |
| mp-572526 | $SbBr(OF_3)_2$            | 296.203 | 2.967 |
| mp-6245   | $K_5Nb_4O_{12}F$          | 1000    | 2.081 |
| mp-684010 | $K_8Ti_3P_2(O_4F_{11})_2$ | 644.604 | 1.197 |
| mp-707811 | $ZrH_8NOF_5$              | 120.473 | 2.653 |
| mp-18957  | $NaMnO_2$                 | 10.029  | 2.203 |
| mp-543042 | $ScP(H_2O_3)_2$           | 6.227   | 2.472 |
| mp-554706 | $AsSe(ClF_2)_3$           | 25.016  | 1.919 |
| mp-555059 | $TcSb(OF_4)_2$            | 563.916 | 1.831 |



|           |                                                                  |         |       |
|-----------|------------------------------------------------------------------|---------|-------|
| mp-30325  | $\text{In}_2(\text{Se}_2\text{O}_5)_3$                           | 11.794  | 1.105 |
| mp-2650   | $\text{P}_4\text{S}_7$                                           | 7.169   | 1.284 |
| mp-679987 | $\text{NbP}_2\text{S}_2\text{Cl}_5$                              | 392.618 | 1.718 |
| mp-568666 | $\text{RbAuI}_3$                                                 | 73.873  | 1.423 |
| mp-554704 | $\text{TiPHO}_5$                                                 | 6.718   | 2.874 |
| mp-569675 | $\text{Tl}_2\text{Hg}_2\text{PdCl}_8$                            | 44.225  | 1.907 |
| mp-30998  | $\text{Ti}(\text{NO}_3)_4$                                       | 82.762  | 1.392 |
| mp-561065 | $\text{MgTi}_2(\text{PO}_5)_2$                                   | 6.649   | 2.879 |
| mp-707735 | $\text{MgH}_{12}(\text{I}_4\text{O}_3)_2$                        | 18.207  | 2.471 |
| mp-28885  | $\text{PSe}$                                                     | 7.678   | 2.073 |
| mp-556006 | $\text{OsCl}_4\text{O}$                                          | 5.215   | 2.826 |
| mp-28017  | $\text{Na}_8\text{Ti}_5\text{O}_{14}$                            | 114.356 | 2.574 |
| mp-30309  | $\text{Y}_2\text{Au}_5\text{F}_{21}$                             | 9.798   | 2.312 |
| mp-557792 | $\text{HfSCl}_6\text{O}$                                         | 53.127  | 1.161 |
| mp-560146 | $\text{Ba}_{17}\text{Y}_{16}\text{Zn}_8\text{Pt}_4\text{O}_{57}$ | 20.123  | 0.339 |
| mp-27297  | $\text{ReCl}_4\text{O}$                                          | 52.846  | 2.328 |
| mp-556689 | $\text{KZrF}_5$                                                  | 157.295 | 3.105 |
| mp-581967 | $\text{Nb}_2\text{O}_5$                                          | 175.162 | 2.406 |
| mp-505794 | $\text{ScH}_8\text{N}_2\text{Cl}_3$                              | 68.959  | 2.91  |
| mp-643570 | $\text{NiH}_2\text{SO}_5$                                        | 28.218  | 3.828 |
| mp-759651 | $\text{ScH}_8\text{Br}_3\text{N}_2$                              | 72.12   | 2.943 |
| mp-867371 | $\text{K}_2\text{Y}_4\text{Cu}_4\text{Se}_9$                     | 27.094  | 3.531 |
| mp-29602  | $\text{K}_2\text{ZrTe}_3$                                        | 22.201  | 2.229 |
| mp-30989  | $\text{Sn}(\text{NO}_3)_4$                                       | 5.38    | 1.874 |
| mp-28261  | $\text{Na}_4\text{SnO}_3$                                        | 45.119  | 2.309 |
| mp-559790 | $\text{K}_2\text{Nb}_3\text{Cl}_7\text{O}_5$                     | 10.044  | 1.485 |
| mp-559150 | $\text{Na}_9\text{ZrP}_4\text{ClO}_{16}$                         | 117.255 | 4.688 |
| mp-573581 | $\text{Na}_2\text{TeSe}_3$                                       | 8.173   | 1.894 |
| mp-23635  | $\text{TlRe}_6\text{Se}_8\text{Cl}_3$                            | 17.558  | 2.945 |
| mp-542931 | $\text{Bi}_2\text{B}_8\text{O}_{15}$                             | 13.966  | 2.505 |
| mp-561190 | $\text{NaAu}(\text{SO}_4)_2$                                     | 67.572  | 6.162 |
| mp-24741  | $\text{ScH}_3\text{NCl}_3$                                       | 13.94   | 3.925 |
| mp-40575  | $\text{LiNi}_2\text{P}_4\text{H}_3\text{O}_{14}$                 | 30.278  | 1.919 |
| mp-638749 | $\text{Te}_3(\text{PdBr})_4$                                     | 8.304   | 3.696 |
| mp-607454 | $\text{AlCl}_3(\text{NCl}_2)_3$                                  | 617.323 | 3.606 |
| mp-28372  | $\text{AuSeCl}_7$                                                | 87.366  | 3.042 |
| mp-29027  | $\text{Ta}_2\text{O}$                                            | 9.064   | 4.227 |
| mp-29603  | $\text{Rb}_2\text{ZrTe}_3$                                       | 10.878  | 2.961 |
| mp-6118   | $\text{Ca}_3\text{Cu}_3(\text{PO}_4)_4$                          | 9.157   | 6.581 |
| mp-579058 | $\text{Cs}_4\text{Tc}_6\text{S}_{13}$                            | 331.553 | 1.715 |
| mp-19080  | $\text{Na}_2\text{Mn}_3\text{O}_7$                               | 40.891  | 7.179 |
| mp-696078 | $\text{K}_3\text{ZrH}_2\text{S}(\text{OF})_5$                    | 977.22  | 2.646 |
| mp-756748 | $\text{ScH}_3(\text{ClO}_5)_2$                                   | 16.106  | 4.379 |

|           |                                                                              |         |        |
|-----------|------------------------------------------------------------------------------|---------|--------|
| mp-18582  | Rb <sub>2</sub> Ti(Si <sub>2</sub> O <sub>5</sub> ) <sub>3</sub>             | 115.967 | 3.292  |
| mp-583581 | W <sub>2</sub> NCl <sub>9</sub>                                              | 29.183  | 2.243  |
| mp-757840 | Ba <sub>4</sub> (PtO <sub>3</sub> ) <sub>3</sub>                             | 8.272   | 3.692  |
| mp-637112 | AsS <sub>2</sub> IF <sub>6</sub>                                             | 67.595  | 2.478  |
| mp-5449   | Na <sub>2</sub> Ti <sub>6</sub> O <sub>13</sub>                              | 24.507  | 5.759  |
| mp-504934 | Sc <sub>2</sub> Cl <sub>3</sub>                                              | 83.524  | 3.307  |
| mp-555207 | BN(OF <sub>2</sub> ) <sub>2</sub>                                            | 616.756 | 7.495  |
| mp-680168 | K <sub>2</sub> Re <sub>3</sub> C <sub>2</sub> Se <sub>4</sub> N <sub>2</sub> | 11.488  | 2.694  |
| mp-867823 | RbTaGeS <sub>5</sub>                                                         | 195.612 | 7.264  |
| mp-558153 | Ba <sub>4</sub> Nb <sub>2</sub> (OF <sub>4</sub> ) <sub>3</sub>              | 1000    | 1.192  |
| mp-8065   | K <sub>2</sub> Ti <sub>6</sub> O <sub>13</sub>                               | 5.952   | 6.088  |
| mp-6698   | Th <sub>2</sub> Cu(PO <sub>4</sub> ) <sub>3</sub>                            | 94.794  | 2.523  |
| mp-6748   | Cs <sub>2</sub> Ti(Si <sub>2</sub> O <sub>5</sub> ) <sub>3</sub>             | 97.322  | 3.767  |
| mp-560348 | K <sub>6</sub> Nb <sub>4</sub> S <sub>25</sub>                               | 7.345   | 1.887  |
| mp-31034  | ThF <sub>4</sub>                                                             | 7.683   | 2.633  |
| mp-865606 | CsTaGeS <sub>5</sub>                                                         | 342.591 | 7.844  |
| mp-573340 | Nb <sub>2</sub> Se <sub>17</sub> Cl <sub>12</sub>                            | 7.8     | 2.662  |
| mp-583762 | Na <sub>3</sub> W <sub>3</sub> Cl <sub>13</sub>                              | 167.611 | 1.927  |
| mp-541155 | VS <sub>4</sub>                                                              | 73.238  | 3.387  |
| mp-30954  | Gal <sub>3</sub>                                                             | 5.604   | 6.746  |
| mp-554657 | Na <sub>2</sub> Tl <sub>2</sub> B <sub>10</sub> O <sub>17</sub>              | 10.285  | 3.111  |
| mp-541758 | Ta <sub>2</sub> Se <sub>17</sub> Br <sub>12</sub>                            | 7.18    | 3.077  |
| mp-567734 | AlAs <sub>3</sub> (SeCl) <sub>4</sub>                                        | 11.968  | 1.935  |
| mp-581963 | K <sub>4</sub> Hf <sub>3</sub> Te <sub>17</sub>                              | 8.674   | 1.714  |
| mp-28684  | Sb <sub>3</sub> Se <sub>4</sub> F <sub>35</sub>                              | 110.513 | 3.438  |
| mp-758985 | RbTiPS <sub>5</sub>                                                          | 276.494 | 4.444  |
| mp-554702 | NaZr <sub>2</sub> NiF <sub>11</sub>                                          | 1000    | 9.393  |
| mp-557289 | TiP <sub>2</sub> Cl <sub>6</sub> O <sub>3</sub>                              | 21.72   | 4.185  |
| mp-15141  | NaZr <sub>2</sub> ZnF <sub>11</sub>                                          | 174.022 | 9.722  |
| mp-680498 | RbTaPS <sub>6</sub>                                                          | 18.91   | 2.623  |
| mp-6903   | Na <sub>2</sub> Ca <sub>4</sub> ZrNbSi <sub>4</sub> O <sub>17</sub> F        | 1000    | 8.669  |
| mp-559292 | P <sub>4</sub> Pb <sub>3</sub> Xe <sub>11</sub> F <sub>58</sub>              | 19.078  | 4.657  |
| mp-4351   | K <sub>2</sub> B <sub>2</sub> S <sub>7</sub>                                 | 5.326   | 7.665  |
| mp-559602 | AgSb(S <sub>2</sub> F <sub>3</sub> ) <sub>2</sub>                            | 5.425   | 5.965  |
| mp-542630 | P <sub>4</sub> S <sub>9</sub>                                                | 13.52   | 7.557  |
| mp-744764 | Mn <sub>2</sub> P <sub>4</sub> (HO <sub>6</sub> ) <sub>4</sub>               | 24.557  | 18.046 |
| mp-556837 | AgAs(S <sub>2</sub> F <sub>3</sub> ) <sub>2</sub>                            | 7.251   | 6.588  |
| mp-559968 | Na <sub>2</sub> NbAsO <sub>6</sub>                                           | 43.798  | 5.883  |
| mp-698567 | Cr(Bi <sub>2</sub> O <sub>12</sub> ) <sub>2</sub>                            | 29.149  | 12.56  |
| mp-14651  | Zr <sub>2</sub> AgPdF <sub>11</sub>                                          | 151.913 | 15.531 |
| mp-581877 | Cs <sub>2</sub> Zr(Si <sub>2</sub> O <sub>5</sub> ) <sub>3</sub>             | 5.575   | 5.288  |
| mp-4649   | PdSe <sub>2</sub> O <sub>5</sub>                                             | 15.388  | 15.828 |
| mp-582483 | Na <sub>2</sub> Th(PO <sub>4</sub> ) <sub>2</sub>                            | 707.888 | 8.262  |

|           |                                                                                  |         |         |
|-----------|----------------------------------------------------------------------------------|---------|---------|
| mp-680048 | RbW <sub>3</sub> Br <sub>7</sub>                                                 | 5.237   | 3.851   |
| mp-28075  | K <sub>2</sub> Ti <sub>2</sub> O <sub>5</sub>                                    | 108.599 | 29.567  |
| mp-28079  | Na <sub>2</sub> Mn <sub>2</sub> S <sub>3</sub>                                   | 13.111  | 7.235   |
| mp-557863 | K <sub>2</sub> Ag <sub>4</sub> Pt <sub>3</sub> (NO <sub>2</sub> ) <sub>12</sub>  | 1000    | 7.542   |
| mp-505392 | Ba <sub>3</sub> V <sub>4</sub> O <sub>13</sub>                                   | 21.692  | 9.037   |
| mp-554626 | Ba(BrO <sub>3</sub> ) <sub>2</sub>                                               | 10.039  | 13.071  |
| mp-640389 | Cs <sub>2</sub> Th(PS <sub>3</sub> ) <sub>3</sub>                                | 29.473  | 8.789   |
| mp-685928 | Rb <sub>5</sub> Tc <sub>3</sub> S <sub>7</sub>                                   | 1000    | 7.251   |
| mp-555231 | Ba <sub>3</sub> Bi <sub>2</sub> (PO <sub>4</sub> ) <sub>4</sub>                  | 37.493  | 7.803   |
| mp-770948 | Na <sub>3</sub> CoPCO <sub>7</sub>                                               | 18.044  | 21.714  |
| mp-28368  | TlAuCl <sub>4</sub>                                                              | 31.851  | 20.874  |
| mp-559336 | NaNb <sub>3</sub> (TeO <sub>4</sub> ) <sub>4</sub>                               | 421.234 | 31.033  |
| mp-676313 | RbMo <sub>3</sub> Br <sub>7</sub>                                                | 9.011   | 4.937   |
| mp-677246 | Ba <sub>6</sub> Ti <sub>2</sub> Nb <sub>10</sub> Si <sub>8</sub> O <sub>51</sub> | 19.041  | 16.78   |
| mp-18664  | K <sub>4</sub> Ta <sub>2</sub> S <sub>11</sub>                                   | 7.005   | 20.739  |
| mp-14935  | P <sub>3</sub> RhO <sub>9</sub>                                                  | 9.056   | 7.341   |
| mp-554686 | MgAs <sub>2</sub> (XeF <sub>9</sub> ) <sub>2</sub>                               | 1000    | 16.96   |
| mp-721471 | CuPH <sub>4</sub> O <sub>5</sub> F                                               | 321.263 | 34.64   |
| mp-569442 | RbAuCl <sub>4</sub>                                                              | 45.825  | 29.085  |
| mp-761870 | H <sub>3</sub> C <sub>3</sub> N <sub>6</sub> Cl                                  | 6.42    | 9.915   |
| mp-28501  | K <sub>2</sub> (NbCl <sub>3</sub> ) <sub>3</sub>                                 | 21.383  | 16.066  |
| mp-674338 | K <sub>16</sub> Zr <sub>12</sub> Se <sub>61</sub>                                | 28.124  | 16.372  |
| mp-505798 | Na <sub>4</sub> TiSe <sub>4</sub>                                                | 11.083  | 14.4    |
| mp-698655 | KMgIn(MoO <sub>4</sub> ) <sub>3</sub>                                            | 13.333  | 20.776  |
| mp-755492 | NaCuP <sub>2</sub> O <sub>7</sub>                                                | 6.842   | 63.362  |
| mp-862605 | Rb <sub>4</sub> Zr <sub>6</sub> CCl <sub>18</sub>                                | 18.411  | 28.79   |
| mp-8989   | Na <sub>2</sub> P <sub>2</sub> PdO <sub>7</sub>                                  | 36.655  | 66.25   |
| mp-6467   | Na <sub>2</sub> CuP <sub>2</sub> O <sub>7</sub>                                  | 20.11   | 102.782 |
| mp-680237 | K <sub>10</sub> Th <sub>3</sub> (P <sub>5</sub> S <sub>18</sub> ) <sub>2</sub>   | 8.846   | 29.878  |

Table S2 Data for the results shown in Figure 5-d (p-type doping) along with Material Project ID (MPID) and chemical formula.

| MPID     | Formula                                                                         | Standard deviation of effective mass | $E_f$ (eV/ $\text{\AA}^2$ ) |
|----------|---------------------------------------------------------------------------------|--------------------------------------|-----------------------------|
| mp-10070 | BaAg(PO <sub>3</sub> ) <sub>3</sub>                                             | 41.465                               | 0.355                       |
| mp-10408 | K <sub>2</sub> CN <sub>2</sub>                                                  | 76.387                               | 2.298                       |
| mp-10419 | Na <sub>4</sub> ReN <sub>3</sub>                                                | 48.202                               | 0.591                       |
| mp-10919 | Rb <sub>2</sub> PtC <sub>2</sub>                                                | 41.749                               | 0.15                        |
| mp-11923 | Rb <sub>2</sub> TaCuS <sub>4</sub>                                              | 143.032                              | 0.033                       |
| mp-11924 | Rb <sub>2</sub> TaCuSe <sub>4</sub>                                             | 39.98                                | 0.029                       |
| mp-12444 | SrCuSF                                                                          | 96.916                               | 0.455                       |
| mp-13445 | Rb <sub>2</sub> As <sub>2</sub> Pt                                              | 375.636                              | 0.113                       |
| mp-13738 | CsCd(PO <sub>3</sub> ) <sub>3</sub>                                             | 37.395                               | 0.313                       |
| mp-13743 | K <sub>3</sub> GaO <sub>3</sub>                                                 | 52.059                               | 0.191                       |
| mp-13792 | KTaP <sub>4</sub> O <sub>13</sub>                                               | 31.553                               | 0.205                       |
| mp-13985 | Li <sub>2</sub> PdF <sub>6</sub>                                                | 91.644                               | 0.07                        |
| mp-13998 | Na <sub>5</sub> AlO <sub>4</sub>                                                | 56.541                               | 0.214                       |
| mp-14128 | K <sub>2</sub> HfF <sub>6</sub>                                                 | 32.977                               | 0.201                       |
| mp-14364 | Cs <sub>2</sub> LiAsO <sub>4</sub>                                              | 223.612                              | 0.292                       |
| mp-14368 | SbAsO <sub>5</sub>                                                              | 38.927                               | 0.227                       |
| mp-14401 | NaCaPO <sub>4</sub>                                                             | 106.408                              | 0.257                       |
| mp-14484 | KNaLi <sub>2</sub> (SO <sub>4</sub> ) <sub>2</sub>                              | 156.301                              | 0.349                       |
| mp-14488 | Li <sub>3</sub> In <sub>2</sub> (PO <sub>4</sub> ) <sub>3</sub>                 | 1000                                 | 5.59                        |
| mp-14511 | NaAlGeO <sub>4</sub>                                                            | 43.467                               | 8.086                       |
| mp-14651 | Zr <sub>2</sub> AgPdF <sub>11</sub>                                             | 306.05                               | 15.951                      |
| mp-14653 | AgSb <sub>2</sub> F <sub>12</sub>                                               | 207.196                              | 0.013                       |
| mp-14734 | CsCOF <sub>3</sub>                                                              | 51.255                               | 0.094                       |
| mp-14873 | K <sub>4</sub> Nb <sub>8</sub> Si(P <sub>2</sub> O <sub>17</sub> ) <sub>2</sub> | 90.699                               | 0.314                       |
| mp-14972 | Ba <sub>3</sub> Sc(BO <sub>3</sub> ) <sub>3</sub>                               | 1000                                 | 0.13                        |
| mp-15107 | KSnAsO <sub>5</sub>                                                             | 132.049                              | 0.226                       |
| mp-15108 | RbSnAsO <sub>5</sub>                                                            | 198.784                              | 0.237                       |
| mp-15141 | NaZr <sub>2</sub> ZnF <sub>11</sub>                                             | 1000                                 | 9.722                       |
| mp-15254 | Li <sub>3</sub> AlF <sub>6</sub>                                                | 420.613                              | 0.487                       |
| mp-15395 | CsBePO <sub>4</sub>                                                             | 715.706                              | 0.354                       |
| mp-15433 | K <sub>2</sub> Ga <sub>2</sub> Sb <sub>3</sub>                                  | 34.195                               | 0.065                       |
| mp-15437 | MgP <sub>4</sub> O <sub>11</sub>                                                | 79.608                               | 3.451                       |
| mp-15472 | Ba <sub>4</sub> LiCu(CO <sub>3</sub> ) <sub>2</sub>                             | 1000                                 | 0.264                       |
| mp-15558 | Li <sub>3</sub> GaF <sub>6</sub>                                                | 67.025                               | 0.424                       |
| mp-15750 | TaAgP <sub>4</sub> O <sub>13</sub>                                              | 72.872                               | 0.212                       |
| mp-15845 | SrLi <sub>4</sub> N <sub>2</sub>                                                | 223.471                              | 0.274                       |
| mp-15865 | RbScAsO <sub>4</sub> F                                                          | 36.393                               | 0.189                       |

|          |                                                                  |         |        |
|----------|------------------------------------------------------------------|---------|--------|
| mp-15919 | BeAgPO <sub>4</sub>                                              | 37.5    | 11.375 |
| mp-1602  | SiS <sub>2</sub>                                                 | 42.316  | 0.017  |
| mp-16194 | Rb <sub>2</sub> SiO <sub>3</sub>                                 | 52.123  | 2.358  |
| mp-16543 | Cs <sub>3</sub> Cu <sub>4</sub> O <sub>4</sub>                   | 59.506  | 0.351  |
| mp-16828 | Li <sub>3</sub> B <sub>3</sub> O <sub>12</sub>                   | 39.151  | 0.272  |
| mp-16980 | Rb <sub>2</sub> B <sub>4</sub> O <sub>7</sub>                    | 99.406  | 1.125  |
| mp-17015 | K <sub>4</sub> GeO <sub>4</sub>                                  | 38.661  | 0.721  |
| mp-1707  | BaN <sub>6</sub>                                                 | 119.849 | 0.297  |
| mp-17077 | K <sub>2</sub> YF <sub>5</sub>                                   | 38.215  | 0.354  |
| mp-17085 | Rb <sub>2</sub> Zr <sub>3</sub> OF <sub>12</sub>                 | 51.089  | 0.092  |
| mp-17166 | K <sub>2</sub> B <sub>4</sub> O <sub>7</sub>                     | 123.576 | 1.34   |
| mp-17229 | RbBe <sub>3</sub> ZnF <sub>9</sub>                               | 64.722  | 0.242  |
| mp-17256 | Rb <sub>2</sub> Hf <sub>3</sub> OF <sub>12</sub>                 | 54.403  | 0.096  |
| mp-17297 | Na <sub>2</sub> GeF <sub>6</sub>                                 | 58.04   | 0.277  |
| mp-17315 | Zr <sub>3</sub> Tl <sub>2</sub> OF <sub>12</sub>                 | 120.774 | 0.083  |
| mp-17337 | RbAsOF <sub>4</sub>                                              | 1000    | 3.077  |
| mp-17394 | NaYGeO <sub>4</sub>                                              | 57.394  | 0.549  |
| mp-17401 | Rb <sub>3</sub> Sn <sub>4</sub> Au                               | 162.327 | 0.063  |
| mp-17447 | Sr <sub>10</sub> P <sub>6</sub> SO <sub>24</sub>                 | 63.346  | 0.191  |
| mp-17512 | Zn(AuF <sub>4</sub> ) <sub>2</sub>                               | 36.972  | 0.227  |
| mp-17516 | Ca <sub>10</sub> P <sub>6</sub> SeO <sub>24</sub>                | 142.124 | 0.216  |
| mp-17539 | KAsOF <sub>4</sub>                                               | 1000    | 2.789  |
| mp-17650 | KGaS <sub>2</sub>                                                | 38.93   | 0.081  |
| mp-17693 | SrCdP <sub>2</sub> O <sub>7</sub>                                | 59.739  | 1.885  |
| mp-17730 | K <sub>2</sub> SnO <sub>3</sub>                                  | 47.597  | 0.283  |
| mp-17761 | CaGeO <sub>3</sub>                                               | 35.803  | 1.113  |
| mp-17771 | NaMg <sub>4</sub> (AsO <sub>4</sub> ) <sub>3</sub>               | 65.098  | 0.377  |
| mp-17850 | K <sub>3</sub> NaTh <sub>2</sub> O <sub>6</sub>                  | 38.186  | 0.516  |
| mp-17886 | K <sub>2</sub> Al <sub>2</sub> Sb <sub>3</sub>                   | 31.445  | 0.068  |
| mp-17888 | K <sub>2</sub> Zr <sub>3</sub> OF <sub>12</sub>                  | 297.491 | 0.057  |
| mp-17941 | Na <sub>2</sub> B <sub>4</sub> O <sub>7</sub>                    | 852.73  | 0.536  |
| mp-17951 | Cs <sub>4</sub> Zn <sub>3</sub> F <sub>10</sub>                  | 47.488  | 0.142  |
| mp-18003 | CsCuS <sub>4</sub>                                               | 55.095  | 0.034  |
| mp-18065 | BaCaAlF <sub>7</sub>                                             | 355.368 | 0.537  |
| mp-18183 | YSnF <sub>7</sub>                                                | 266.442 | 0.957  |
| mp-18253 | SrGa <sub>4</sub> O <sub>7</sub>                                 | 74.4    | 0.82   |
| mp-18271 | Na <sub>5</sub> Ti <sub>2</sub> Si <sub>2</sub> PO <sub>13</sub> | 1000    | 1.809  |
| mp-18343 | BaMgP <sub>2</sub> O <sub>7</sub>                                | 60.512  | 1.427  |
| mp-18347 | KAlTe <sub>2</sub>                                               | 44.584  | 0.055  |
| mp-18429 | KAg(NO <sub>3</sub> ) <sub>2</sub>                               | 146.466 | 0.08   |
| mp-18460 | K <sub>2</sub> Si <sub>6</sub> GeO <sub>15</sub>                 | 47.19   | 0.858  |
| mp-18463 | RbZnPO <sub>4</sub>                                              | 814.522 | 0.306  |

|          |                                                                  |         |       |
|----------|------------------------------------------------------------------|---------|-------|
| mp-18464 | Rb <sub>4</sub> GeO <sub>4</sub>                                 | 82.165  | 0.4   |
| mp-18500 | K <sub>3</sub> Sn <sub>4</sub> Au                                | 63.539  | 0.068 |
| mp-18582 | Rb <sub>2</sub> Ti(Si <sub>2</sub> O <sub>5</sub> ) <sub>3</sub> | 56.681  | 3.293 |
| mp-18687 | NbF <sub>5</sub>                                                 | 80.099  | 0.289 |
| mp-18702 | AgPO <sub>3</sub>                                                | 35.846  | 3.348 |
| mp-18809 | Li <sub>2</sub> VGeO <sub>5</sub>                                | 41.355  | 0.468 |
| mp-18832 | K <sub>2</sub> VO <sub>2</sub> F <sub>3</sub>                    | 41.004  | 0.157 |
| mp-18860 | Li <sub>2</sub> VSiO <sub>5</sub>                                | 77.685  | 0.658 |
| mp-18935 | K <sub>2</sub> V(PO <sub>4</sub> ) <sub>2</sub>                  | 1000    | 0.637 |
| mp-18953 | NaV(OF) <sub>2</sub>                                             | 54.461  | 0.92  |
| mp-18997 | LiMnPO <sub>4</sub>                                              | 48.838  | 0.181 |
| mp-19026 | Na <sub>4</sub> FeO <sub>3</sub>                                 | 97.224  | 0.706 |
| mp-19037 | K <sub>2</sub> W <sub>2</sub> O <sub>7</sub>                     | 677.551 | 0.298 |
| mp-19167 | Rb <sub>2</sub> NiO <sub>2</sub>                                 | 1000    | 0.039 |
| mp-19252 | K <sub>2</sub> NiO <sub>2</sub>                                  | 1000    | 0.05  |
| mp-19261 | Na <sub>3</sub> MnPCO <sub>7</sub>                               | 52.405  | 0.377 |
| mp-19334 | Na <sub>4</sub> WO <sub>5</sub>                                  | 48.527  | 8.514 |
| mp-19388 | BaNi <sub>2</sub> (AsO <sub>4</sub> ) <sub>2</sub>               | 51.825  | 0.199 |
| mp-19443 | WO <sub>3</sub>                                                  | 541.643 | 0.328 |
| mp-19488 | Rb <sub>2</sub> MnSO <sub>4</sub> F <sub>3</sub>                 | 128.85  | 0.279 |
| mp-19508 | SrCr(Si <sub>2</sub> O <sub>5</sub> ) <sub>2</sub>               | 1000    | 0.314 |
| mp-19512 | BaV <sub>2</sub> (PO <sub>3</sub> ) <sub>2</sub>                 | 321.495 | 0.405 |
| mp-19514 | Sr <sub>2</sub> CrO <sub>4</sub>                                 | 33.178  | 0.116 |
| mp-19518 | BaCr(Si <sub>2</sub> O <sub>5</sub> ) <sub>2</sub>               | 316.448 | 0.353 |
| mp-19660 | Sr <sub>2</sub> V <sub>2</sub> O <sub>7</sub>                    | 75.99   | 0.091 |
| mp-19893 | PbCO <sub>3</sub>                                                | 33.228  | 0.257 |
| mp-19956 | Ba <sub>2</sub> InO <sub>3</sub> F                               | 1000    | 0.098 |
| mp-20352 | Ba <sub>3</sub> In <sub>2</sub> O <sub>6</sub>                   | 756.838 | 0.095 |
| mp-20546 | Ba <sub>2</sub> In <sub>2</sub> O <sub>5</sub>                   | 1000    | 0.184 |
| mp-2131  | SrN <sub>6</sub>                                                 | 54.119  | 0.154 |
| mp-21760 | Rb <sub>2</sub> In <sub>2</sub> Sb <sub>3</sub>                  | 34.439  | 0.057 |
| mp-21835 | Cs <sub>2</sub> In <sub>2</sub> Sb <sub>3</sub>                  | 38.878  | 0.053 |
| mp-22216 | In <sub>2</sub> S <sub>3</sub>                                   | 111.485 | 0.065 |
| mp-22661 | InAg(PS <sub>3</sub> ) <sub>2</sub>                              | 35.454  | 0.023 |
| mp-22935 | CsBrF                                                            | 42.677  | 0.141 |
| mp-22977 | CsVCl <sub>3</sub>                                               | 941.685 | 0.114 |
| mp-22978 | Rb <sub>2</sub> MnCl <sub>4</sub>                                | 1000    | 0.029 |
| mp-22991 | CsVI <sub>3</sub>                                                | 123.316 | 0.085 |
| mp-23038 | CsVBr <sub>3</sub>                                               | 370.219 | 0.096 |
| mp-23162 | ZrCl <sub>2</sub>                                                | 164.1   | 0.018 |
| mp-23174 | ReCl <sub>3</sub>                                                | 107.61  | 0.136 |
| mp-23184 | BCl <sub>3</sub>                                                 | 406.905 | 0.009 |

|          |                                                                                |         |       |
|----------|--------------------------------------------------------------------------------|---------|-------|
| mp-23189 | BI <sub>3</sub>                                                                | 257.1   | 0.012 |
| mp-23225 | BBr <sub>3</sub>                                                               | 397.264 | 0.01  |
| mp-23267 | BeCl <sub>2</sub>                                                              | 124.691 | 0.013 |
| mp-23403 | SbIF <sub>5</sub>                                                              | 1000    | 0.34  |
| mp-23434 | Al <sub>2</sub> CuCl <sub>8</sub>                                              | 33.103  | 0.241 |
| mp-23515 | K <sub>2</sub> CoCl <sub>4</sub>                                               | 45.879  | 0.069 |
| mp-23550 | KBrF <sub>4</sub>                                                              | 40.266  | 0.289 |
| mp-23568 | XeN <sub>2</sub> (OF <sub>4</sub> ) <sub>2</sub>                               | 112.556 | 0.065 |
| mp-23576 | CsSbClF <sub>3</sub>                                                           | 60.886  | 0.086 |
| mp-23598 | SiO <sub>3</sub> F                                                             | 59.668  | 0.159 |
| mp-23634 | KSbClF <sub>3</sub>                                                            | 54.807  | 0.059 |
| mp-23660 | KNa <sub>22</sub> C <sub>2</sub> S <sub>6</sub> ClO <sub>42</sub>              | 1000    | 0.15  |
| mp-23701 | CaB <sub>8</sub> H <sub>4</sub> O <sub>15</sub>                                | 268.138 | 2.556 |
| mp-23702 | LiH <sub>2</sub> N                                                             | 148.954 | 0.527 |
| mp-23748 | MgBHO <sub>3</sub>                                                             | 33.791  | 0.642 |
| mp-23776 | BeH <sub>4</sub> (ClO <sub>2</sub> ) <sub>2</sub>                              | 34.684  | 0.392 |
| mp-23780 | Na <sub>3</sub> H(SO <sub>4</sub> ) <sub>2</sub>                               | 60.694  | 0.684 |
| mp-23800 | KHSO <sub>4</sub>                                                              | 182.417 | 0.255 |
| mp-23846 | KHF <sub>2</sub>                                                               | 40.637  | 0.228 |
| mp-23904 | BaH <sub>4</sub> O <sub>3</sub>                                                | 37.764  | 0.109 |
| mp-24007 | Rb <sub>2</sub> HBrO                                                           | 118.278 | 0.432 |
| mp-24022 | RbH <sub>3</sub> (SeO <sub>3</sub> ) <sub>2</sub>                              | 319.111 | 0.055 |
| mp-24030 | ZrP <sub>2</sub> (HO <sub>3</sub> ) <sub>2</sub>                               | 34.289  | 0.403 |
| mp-24058 | AgBH <sub>2</sub> OF <sub>4</sub>                                              | 94.627  | 0.034 |
| mp-24072 | AgH <sub>5</sub> S <sub>2</sub> O <sub>9</sub>                                 | 192.166 | 0.501 |
| mp-24097 | Mg <sub>3</sub> Si <sub>2</sub> H <sub>4</sub> O <sub>9</sub>                  | 874.274 | 0.072 |
| mp-24112 | Rb <sub>2</sub> ZnH <sub>12</sub> (SO <sub>4</sub> ) <sub>2</sub>              | 45.946  | 0.97  |
| mp-24118 | H <sub>10</sub> SO <sub>8</sub>                                                | 64.247  | 0.253 |
| mp-2414  | SO <sub>3</sub>                                                                | 46.657  | 0.009 |
| mp-24141 | CsHSeO <sub>4</sub>                                                            | 63.503  | 0.052 |
| mp-24144 | Na <sub>5</sub> ScH <sub>4</sub> (C <sub>2</sub> O <sub>7</sub> ) <sub>2</sub> | 43.771  | 0.279 |
| mp-2416  | YF <sub>3</sub>                                                                | 38.522  | 0.092 |
| mp-24160 | BH <sub>3</sub> NF <sub>3</sub>                                                | 43.809  | 0.415 |
| mp-24193 | NaH <sub>3</sub> O <sub>2</sub>                                                | 233.038 | 0.037 |
| mp-24196 | Tl <sub>2</sub> CuH <sub>12</sub> (SO <sub>4</sub> ) <sub>2</sub>              | 287.037 | 0.596 |
| mp-24230 | HCNO                                                                           | 106.142 | 1.843 |
| mp-24302 | CdAs <sub>2</sub> HF <sub>13</sub>                                             | 169.244 | 0.165 |
| mp-24308 | AlSiH <sub>4</sub> C <sub>3</sub> Cl <sub>2</sub> O                            | 38.546  | 0.557 |
| mp-24340 | K <sub>3</sub> GeH <sub>3</sub> S <sub>3</sub> O <sub>2</sub>                  | 41.239  | 0.045 |
| mp-24428 | KH <sub>2</sub> N                                                              | 227.471 | 0.066 |
| mp-24460 | MgH <sub>4</sub> (SO <sub>4</sub> ) <sub>4</sub>                               | 31.603  | 0.505 |
| mp-2452  | P <sub>2</sub> O <sub>5</sub>                                                  | 276.733 | 0.248 |

|          |                                                               |         |        |
|----------|---------------------------------------------------------------|---------|--------|
| mp-24656 | YH <sub>3</sub> (SO <sub>4</sub> ) <sub>3</sub>               | 88.053  | 0.118  |
| mp-24683 | RbZn <sub>2</sub> P <sub>2</sub> HO <sub>8</sub>              | 269.408 | 0.544  |
| mp-24747 | Na <sub>3</sub> H <sub>6</sub> Rh                             | 50.151  | 0.247  |
| mp-24757 | AlBP <sub>2</sub> H <sub>5</sub> NO <sub>9</sub>              | 89.354  | 0.473  |
| mp-24761 | RbGaBP <sub>2</sub> HO <sub>9</sub>                           | 48.344  | 0.51   |
| mp-24822 | Na <sub>5</sub> Al <sub>3</sub> H <sub>14</sub>               | 45.009  | 0.167  |
| mp-25305 | Y <sub>2</sub> Ti <sub>2</sub> S <sub>2</sub> O <sub>5</sub>  | 104.897 | 0.394  |
| mp-2632  | TlF <sub>3</sub>                                              | 32.158  | 0.045  |
| mp-27094 | LiSn <sub>2</sub> (PO <sub>4</sub> ) <sub>3</sub>             | 39.449  | 6.108  |
| mp-27169 | KTa <sub>3</sub> O <sub>13</sub>                              | 93.502  | 0.177  |
| mp-27212 | Sb <sub>2</sub> IF <sub>15</sub>                              | 516.296 | 0.293  |
| mp-27213 | AuBr <sub>3</sub>                                             | 184.201 | 0.208  |
| mp-27256 | Sb <sub>2</sub> (S <sub>2</sub> O <sub>7</sub> ) <sub>3</sub> | 34.965  | 1.047  |
| mp-27288 | RuXeF <sub>7</sub>                                            | 889.614 | 3.571  |
| mp-27297 | ReCl <sub>4</sub> O                                           | 48.064  | 2.425  |
| mp-27307 | Na <sub>2</sub> ZrF <sub>6</sub>                              | 609.02  | 0.29   |
| mp-27308 | SbBrF <sub>8</sub>                                            | 42.724  | 0.251  |
| mp-27322 | Nb <sub>2</sub> Te <sub>3</sub> O <sub>11</sub>               | 143.941 | 0.327  |
| mp-27344 | Be(BH <sub>4</sub> ) <sub>2</sub>                             | 52.712  | 0.116  |
| mp-27345 | Na <sub>3</sub> BiO <sub>4</sub>                              | 38.823  | 11.373 |
| mp-27349 | BSF <sub>7</sub>                                              | 383.077 | 0.399  |
| mp-27353 | SbCl <sub>2</sub> F <sub>3</sub>                              | 1000    | 3.807  |
| mp-27376 | Rb <sub>6</sub> Si <sub>10</sub> O <sub>23</sub>              | 72.924  | 0.226  |
| mp-27384 | AgIO <sub>3</sub>                                             | 59.98   | 0.044  |
| mp-27389 | KSb <sub>2</sub> F <sub>7</sub>                               | 98.386  | 0.025  |
| mp-27396 | NiCl <sub>2</sub>                                             | 114.004 | 0.029  |
| mp-27399 | SbBr <sub>3</sub>                                             | 32.221  | 0.012  |
| mp-27425 | Sr(HO) <sub>2</sub>                                           | 45.673  | 0.106  |
| mp-27452 | Al <sub>2</sub> PdCl <sub>8</sub>                             | 116.934 | 0.319  |
| mp-27472 | NbSbF <sub>10</sub>                                           | 102.484 | 0.292  |
| mp-27473 | Sb <sub>2</sub> TeF <sub>14</sub>                             | 1000    | 0.193  |
| mp-27556 | CsNbO <sub>3</sub>                                            | 82.062  | 0.351  |
| mp-27579 | Na <sub>4</sub> P <sub>2</sub> O <sub>7</sub>                 | 257.254 | 0.27   |
| mp-27648 | Te <sub>2</sub> Br                                            | 48.04   | 0.098  |
| mp-27664 | TiPCl <sub>9</sub>                                            | 55.331  | 0.177  |
| mp-27674 | K <sub>5</sub> As <sub>3</sub> O <sub>10</sub>                | 121.894 | 0.521  |
| mp-27692 | BaB <sub>4</sub> O <sub>7</sub>                               | 60.276  | 1.135  |
| mp-27697 | ThI <sub>4</sub>                                              | 66.134  | 0.658  |
| mp-27702 | InClO                                                         | 38.623  | 0.011  |
| mp-27786 | SbAs <sub>2</sub> Cl <sub>13</sub>                            | 41.19   | 0.042  |
| mp-27792 | K <sub>2</sub> S <sub>3</sub> O <sub>16</sub>                 | 1000    | 0.403  |
| mp-27849 | TiBrN                                                         | 1000    | 0.016  |



|          |                                                  |         |       |
|----------|--------------------------------------------------|---------|-------|
| mp-27850 | TiNCl                                            | 1000    | 0.015 |
| mp-27863 | AlClO                                            | 38.261  | 0.012 |
| mp-27866 | MoS <sub>2</sub> Cl <sub>3</sub>                 | 68.11   | 2.035 |
| mp-27915 | K <sub>2</sub> BeO <sub>2</sub>                  | 1000    | 1.496 |
| mp-27921 | Ti <sub>2</sub> PdCl <sub>3</sub>                | 68.51   | 0.08  |
| mp-27988 | IF <sub>7</sub>                                  | 252.788 | 0.004 |
| mp-27998 | KNb <sub>3</sub> O <sub>8</sub>                  | 134.539 | 0.415 |
| mp-28037 | Mo <sub>2</sub> SBr <sub>2</sub>                 | 73.71   | 0.126 |
| mp-28064 | SbS <sub>4</sub> Cl <sub>3</sub>                 | 57.507  | 5.73  |
| mp-28065 | ThNCl                                            | 56.654  | 0.063 |
| mp-28066 | ThBrN                                            | 65.802  | 0.044 |
| mp-28085 | KAs <sub>2</sub> F <sub>7</sub>                  | 56.973  | 0.645 |
| mp-28125 | H <sub>11</sub> NF <sub>8</sub>                  | 299.72  | 0.32  |
| mp-28163 | K <sub>2</sub> PdF <sub>4</sub>                  | 39.728  | 0.086 |
| mp-28174 | Pd(SCl <sub>3</sub> ) <sub>2</sub>               | 93.732  | 0.34  |
| mp-28185 | TaClF <sub>8</sub>                               | 70.05   | 0.243 |
| mp-28202 | K <sub>3</sub> NO <sub>4</sub>                   | 37.314  | 0.092 |
| mp-28204 | CsH <sub>3</sub> O <sub>4</sub>                  | 49.284  | 0.402 |
| mp-28211 | IrS <sub>3</sub> Cl <sub>11</sub>                | 123.291 | 0.049 |
| mp-28233 | MnCl <sub>2</sub>                                | 41.814  | 0.019 |
| mp-28257 | SO <sub>2</sub> F <sub>2</sub>                   | 47.62   | 0.007 |
| mp-28270 | KCuS                                             | 1000    | 0.039 |
| mp-28273 | K <sub>3</sub> CuO <sub>2</sub>                  | 45.875  | 0.12  |
| mp-28306 | MnBr <sub>2</sub>                                | 39.541  | 0.022 |
| mp-28330 | TeAuCl <sub>7</sub>                              | 1000    | 0.211 |
| mp-28375 | Ta <sub>2</sub> AgF <sub>12</sub>                | 361.697 | 0.553 |
| mp-28387 | PAuCl <sub>8</sub>                               | 206.169 | 0.075 |
| mp-28428 | K <sub>3</sub> Nb <sub>2</sub> Se <sub>11</sub>  | 407.069 | 0.265 |
| mp-28479 | Sc <sub>2</sub> CCl <sub>2</sub>                 | 1000    | 0.011 |
| mp-28541 | Bi <sub>2</sub> P <sub>4</sub> O <sub>13</sub>   | 780.371 | 0.963 |
| mp-28575 | W(S <sub>4</sub> Cl <sub>3</sub> ) <sub>2</sub>  | 86.047  | 0.137 |
| mp-28577 | RbBrF <sub>4</sub>                               | 87.135  | 0.006 |
| mp-28627 | K <sub>4</sub> Br <sub>2</sub> O                 | 152.929 | 0.024 |
| mp-28634 | KI <sub>3</sub> F <sub>16</sub>                  | 569.98  | 0.164 |
| mp-2865  | K <sub>2</sub> CuF <sub>4</sub>                  | 193.04  | 0.046 |
| mp-28676 | S <sub>2</sub> O <sub>3</sub> F <sub>2</sub>     | 42.764  | 0.289 |
| mp-28683 | Ta(ICI) <sub>2</sub>                             | 118.127 | 0.022 |
| mp-28684 | Sb <sub>3</sub> Se <sub>8</sub> F <sub>35</sub>  | 178.307 | 3.438 |
| mp-28726 | KYF <sub>4</sub>                                 | 231.912 | 0.086 |
| mp-28744 | Y <sub>4</sub> OsBr <sub>4</sub>                 | 63.002  | 0.133 |
| mp-28778 | KScF <sub>4</sub>                                | 42.74   | 0.826 |
| mp-28788 | Ba <sub>4</sub> (AuO <sub>6</sub> ) <sub>2</sub> | 56.272  | 0.264 |

|          |                                                 |         |       |
|----------|-------------------------------------------------|---------|-------|
| mp-28804 | TcO <sub>2</sub> F <sub>3</sub>                 | 80.725  | 0.385 |
| mp-28859 | K <sub>2</sub> HgS <sub>2</sub>                 | 493.024 | 0.037 |
| mp-28883 | GeP <sub>2</sub> O <sub>7</sub>                 | 51.775  | 0.258 |
| mp-28913 | Ti <sub>6</sub> CCl <sub>14</sub>               | 96.222  | 0.203 |
| mp-28974 | TiF <sub>4</sub>                                | 137.524 | 0.237 |
| mp-28985 | SbSeCl <sub>9</sub>                             | 98.748  | 0.298 |
| mp-29030 | ThTi <sub>3</sub> F <sub>7</sub>                | 48.71   | 0.085 |
| mp-29040 | Li <sub>3</sub> Zr <sub>4</sub> F <sub>19</sub> | 872.779 | 1.138 |
| mp-29085 | Sr <sub>5</sub> Zr <sub>3</sub> F <sub>22</sub> | 81.824  | 0.302 |
| mp-29095 | H <sub>4</sub> SO <sub>5</sub>                  | 32.859  | 1.46  |
| mp-29114 | Re <sub>3</sub> Te <sub>4</sub> Cl <sub>5</sub> | 54.136  | 0.117 |
| mp-29144 | KTe <sub>2</sub> F <sub>9</sub>                 | 34.814  | 0.165 |
| mp-29149 | Li <sub>4</sub> NCl                             | 64.134  | 0.239 |
| mp-29193 | Nb <sub>2</sub> Se <sub>4</sub> O <sub>13</sub> | 44.935  | 0.347 |
| mp-29226 | Ca <sub>3</sub> Ga <sub>4</sub> O <sub>9</sub>  | 38.803  | 0.399 |
| mp-29264 | SiCl <sub>7</sub>                               | 33.727  | 0.124 |
| mp-29274 | P <sub>2</sub> PdO <sub>6</sub>                 | 248.025 | 0.251 |
| mp-29276 | Cd <sub>2</sub> P <sub>6</sub> O <sub>17</sub>  | 94.408  | 3.713 |
| mp-29300 | Ga <sub>2</sub> CuCl <sub>8</sub>               | 258.235 | 0.231 |
| mp-29330 | K <sub>2</sub> H <sub>5</sub> F <sub>7</sub>    | 409.557 | 0.686 |
| mp-29363 | Rb <sub>3</sub> GaP <sub>2</sub>                | 33.943  | 0.091 |
| mp-29369 | Sb <sub>7</sub> F <sub>29</sub>                 | 65.329  | 0.233 |
| mp-29386 | K <sub>6</sub> Sn <sub>2</sub> Se <sub>7</sub>  | 44.03   | 0.212 |
| mp-29391 | SbCl <sub>3</sub> F <sub>2</sub>                | 298.863 | 0.117 |
| mp-29411 | Na <sub>2</sub> B <sub>2</sub> S <sub>5</sub>   | 254.298 | 0.15  |
| mp-29449 | Rb <sub>4</sub> Cu <sub>4</sub> Cl <sub>9</sub> | 720.388 | 2.207 |
| mp-29568 | RuS <sub>3</sub> Cl <sub>8</sub>                | 97.974  | 0.229 |
| mp-29693 | Rb <sub>2</sub> AgCl <sub>3</sub>               | 45.127  | 0.038 |
| mp-29694 | KAuBr <sub>4</sub>                              | 63.043  | 0.126 |
| mp-29704 | Cs(SO <sub>2</sub> ) <sub>2</sub>               | 166.096 | 1.002 |
| mp-29794 | Ba <sub>2</sub> PdF <sub>6</sub>                | 786.129 | 0.312 |
| mp-29871 | Na <sub>4</sub> SeO <sub>5</sub>                | 65.976  | 0.993 |
| mp-29877 | K <sub>2</sub> ReH <sub>9</sub>                 | 44.463  | 0.323 |
| mp-29878 | Re <sub>2</sub> P <sub>2</sub> Cl <sub>13</sub> | 49.037  | 0.122 |
| mp-29940 | SbClF <sub>10</sub>                             | 129.999 | 0.012 |
| mp-29966 | NOF                                             | 38.936  | 0.008 |
| mp-29970 | Cs <sub>3</sub> Sb <sub>5</sub> O <sub>14</sub> | 79.605  | 0.21  |
| mp-30003 | AuSO <sub>4</sub>                               | 42.77   | 0.19  |
| mp-30005 | Rb <sub>6</sub> Br <sub>4</sub> O               | 56.333  | 0.06  |
| mp-30010 | AsKrF <sub>7</sub>                              | 520.887 | 0.085 |
| mp-30011 | SbKrF <sub>7</sub>                              | 236.739 | 0.079 |
| mp-30012 | BiKrF <sub>7</sub>                              | 98.53   | 0.107 |

|          |                                                                  |         |       |
|----------|------------------------------------------------------------------|---------|-------|
| mp-30023 | Ba(AlCl <sub>4</sub> ) <sub>2</sub>                              | 54.072  | 0.178 |
| mp-30103 | AuF <sub>5</sub>                                                 | 49.4    | 0.009 |
| mp-30120 | K <sub>3</sub> BiO <sub>4</sub>                                  | 51.776  | 0.672 |
| mp-30130 | Bi <sub>4</sub> I <sub>2</sub> O <sub>5</sub>                    | 51.695  | 0.618 |
| mp-30139 | BeBr <sub>2</sub>                                                | 89.954  | 0.013 |
| mp-30142 | Be <sub>4</sub> N <sub>6</sub> O <sub>19</sub>                   | 1000    | 0.309 |
| mp-30213 | Sb <sub>2</sub> BrF <sub>15</sub>                                | 98.469  | 0.226 |
| mp-30315 | Ca <sub>3</sub> BN <sub>3</sub>                                  | 71.811  | 0.199 |
| mp-30320 | RbHfF <sub>5</sub>                                               | 43.961  | 0.178 |
| mp-30325 | In <sub>2</sub> (Se <sub>2</sub> O <sub>5</sub> ) <sub>3</sub>   | 34.521  | 1.105 |
| mp-30934 | As(Sd) <sub>3</sub>                                              | 40.519  | 0.035 |
| mp-30943 | MgPSe <sub>3</sub>                                               | 607.328 | 0.021 |
| mp-30979 | GaPS <sub>4</sub>                                                | 42.264  | 2.158 |
| mp-30983 | CaP <sub>4</sub> O <sub>11</sub>                                 | 40.226  | 1.849 |
| mp-30989 | Sn(NO <sub>3</sub> ) <sub>4</sub>                                | 102.293 | 1.874 |
| mp-31040 | NbCl <sub>4</sub>                                                | 311.268 | 1.383 |
| mp-31050 | Cl <sub>2</sub> O <sub>7</sub>                                   | 50.657  | 0.008 |
| mp-31060 | Rb <sub>4</sub> (BS) <sub>9</sub>                                | 31.243  | 0.323 |
| mp-31073 | Na <sub>3</sub> B <sub>6</sub> O <sub>12</sub>                   | 58.367  | 0.501 |
| mp-3125  | K <sub>3</sub> Zn <sub>2</sub> F <sub>7</sub>                    | 212.99  | 0.042 |
| mp-31373 | H <sub>18</sub> SO <sub>12</sub>                                 | 1000    | 1.694 |
| mp-3247  | Cs <sub>2</sub> TiS <sub>3</sub>                                 | 38.701  | 0.144 |
| mp-3281  | AlBO <sub>9</sub>                                                | 58.979  | 0.53  |
| mp-3283  | RbNbO <sub>3</sub>                                               | 37.601  | 2.779 |
| mp-3318  | Na <sub>2</sub> BeF <sub>4</sub>                                 | 32.236  | 0.241 |
| mp-34022 | Mg <sub>2</sub> SnO <sub>4</sub>                                 | 57.419  | 0.264 |
| mp-3416  | Na <sub>3</sub> AlF <sub>6</sub>                                 | 62.631  | 0.896 |
| mp-3637  | YOF                                                              | 75.031  | 0.154 |
| mp-36381 | Sn(PS <sub>3</sub> ) <sub>2</sub>                                | 48.48   | 0.142 |
| mp-3765  | Sr(PO <sub>3</sub> ) <sub>2</sub>                                | 434.796 | 0.299 |
| mp-3775  | Na <sub>2</sub> SiF <sub>6</sub>                                 | 42.421  | 0.405 |
| mp-3779  | CrSiTe <sub>3</sub>                                              | 92.944  | 0.039 |
| mp-3788  | SrAl <sub>4</sub> O <sub>7</sub>                                 | 88.266  | 1.765 |
| mp-3848  | BaGe <sub>4</sub> O <sub>9</sub>                                 | 31.846  | 0.439 |
| mp-3870  | Sr <sub>2</sub> Nb <sub>2</sub> O <sub>7</sub>                   | 84.024  | 0.35  |
| mp-3881  | BaZnF <sub>4</sub>                                               | 45.195  | 0.277 |
| mp-39140 | Na <sub>4</sub> Al <sub>3</sub> Si <sub>3</sub> HO <sub>13</sub> | 481.206 | 0.487 |
| mp-3928  | Na <sub>5</sub> P <sub>3</sub> O <sub>10</sub>                   | 59.727  | 0.407 |
| mp-3963  | K <sub>2</sub> CO <sub>3</sub>                                   | 53.555  | 0.124 |
| mp-3975  | K <sub>2</sub> TaF <sub>7</sub>                                  | 71.01   | 0.114 |
| mp-39823 | Na <sub>8</sub> Al <sub>6</sub> Si <sub>6</sub> CO <sub>27</sub> | 1000    | 0.288 |
| mp-4009  | BaPdS <sub>2</sub>                                               | 43.652  | 0.135 |

|           |                                                                     |         |        |
|-----------|---------------------------------------------------------------------|---------|--------|
| mp-40144  | SiNiH <sub>12</sub> (OF) <sub>6</sub>                               | 36.413  | 0.335  |
| mp-40575  | LiNi <sub>2</sub> P <sub>4</sub> H <sub>3</sub> O <sub>14</sub>     | 33.208  | 1.102  |
| mp-4138   | Rb <sub>2</sub> CO <sub>3</sub>                                     | 43.842  | 0.112  |
| mp-41473  | CsTiNiOF <sub>5</sub>                                               | 43.314  | 0.45   |
| mp-4185   | Na <sub>3</sub> ScF <sub>6</sub>                                    | 42.774  | 6.116  |
| mp-43068  | Na <sub>3</sub> Al <sub>3</sub> Si <sub>3</sub> AgBrO <sub>12</sub> | 330.145 | 0.315  |
| mp-4531   | NaNO <sub>3</sub>                                                   | 233.466 | 0.127  |
| mp-4649   | PdSe <sub>2</sub> O <sub>5</sub>                                    | 97.616  | 15.793 |
| mp-4661   | ScOF                                                                | 113.203 | 1.87   |
| mp-4691   | Ag <sub>2</sub> CO <sub>3</sub>                                     | 36.994  | 0.276  |
| mp-4758   | K <sub>2</sub> NbF <sub>7</sub>                                     | 95.126  | 0.097  |
| mp-5039   | KPO <sub>3</sub>                                                    | 62.174  | 0.483  |
| mp-504427 | Ti <sub>3</sub> PbO <sub>7</sub>                                    | 241.862 | 0.364  |
| mp-504894 | MgH <sub>12</sub> SeO <sub>9</sub>                                  | 63.329  | 0.12   |
| mp-505234 | BaP <sub>2</sub> PbO <sub>7</sub>                                   | 84.65   | 0.465  |
| mp-505260 | Te <sub>10</sub> Mo <sub>3</sub> I <sub>10</sub>                    | 31.917  | 1.187  |
| mp-505368 | As <sub>2</sub> Pb <sub>3</sub> O <sub>8</sub>                      | 37.497  | 8.354  |
| mp-505392 | Ba <sub>3</sub> V <sub>4</sub> O <sub>13</sub>                      | 69.252  | 9.036  |
| mp-505400 | BaZr <sub>2</sub> F <sub>10</sub>                                   | 45.541  | 0.82   |
| mp-505727 | NCIO                                                                | 49.827  | 0.007  |
| mp-505771 | K <sub>2</sub> NaH <sub>3</sub> (CO <sub>4</sub> ) <sub>2</sub>     | 110.91  | 0.08   |
| mp-505794 | ScH <sub>3</sub> N <sub>2</sub> Cl <sub>3</sub>                     | 79.274  | 2.902  |
| mp-505798 | Na <sub>4</sub> TiSe <sub>4</sub>                                   | 50.041  | 14.416 |
| mp-505814 | CsBa <sub>2</sub> Nb <sub>3</sub> O <sub>10</sub>                   | 1000    | 0.521  |
| mp-5073   | RbNO <sub>3</sub>                                                   | 151.791 | 0.183  |
| mp-510018 | Rb <sub>2</sub> CuH <sub>12</sub> (SeO <sub>7</sub> ) <sub>2</sub>  | 1000    | 0.312  |
| mp-510075 | Cs <sub>7</sub> Au <sub>5</sub> O <sub>2</sub>                      | 1000    | 0.04   |
| mp-510076 | Rb <sub>7</sub> Au <sub>5</sub> O <sub>2</sub>                      | 1000    | 0.047  |
| mp-530449 | Ca <sub>3</sub> (AsO <sub>4</sub> ) <sub>2</sub>                    | 159.639 | 0.247  |
| mp-530524 | Zr <sub>3</sub> TiF <sub>15</sub>                                   | 1000    | 1.293  |
| mp-531826 | Li <sub>2</sub> PtO <sub>3</sub>                                    | 34.665  | 0.326  |
| mp-532315 | Sr <sub>17</sub> (Ta <sub>5</sub> S <sub>21</sub> ) <sub>2</sub>    | 38.198  | 0.787  |
| mp-5348   | MgCO <sub>3</sub>                                                   | 35.699  | 0.328  |
| mp-5401   | Sr <sub>2</sub> B <sub>2</sub> O <sub>5</sub>                       | 39.374  | 0.334  |
| mp-540584 | K <sub>2</sub> PdO <sub>2</sub>                                     | 68.439  | 0.089  |
| mp-540629 | Al <sub>2</sub> Te <sub>2</sub> Cl <sub>7</sub>                     | 57.275  | 0.187  |
| mp-540656 | Sb(S <sub>2</sub> l) <sub>3</sub>                                   | 42.345  | 0.03   |
| mp-540668 | BS <sub>2</sub>                                                     | 488.003 | 0.718  |
| mp-540760 | FePCL <sub>8</sub>                                                  | 51.436  | 0.065  |
| mp-540862 | Ba <sub>2</sub> CaMgAl <sub>2</sub> F <sub>14</sub>                 | 126.218 | 0.165  |
| mp-540868 | Ca <sub>3</sub> Si(ClO <sub>2</sub> ) <sub>2</sub>                  | 1000    | 0.34   |
| mp-540995 | Rb <sub>5</sub> Nb <sub>3</sub> OF <sub>18</sub>                    | 106.425 | 0.27   |

|           |                                                                   |         |       |
|-----------|-------------------------------------------------------------------|---------|-------|
| mp-541114 | Sr <sub>2</sub> RhF <sub>7</sub>                                  | 67.681  | 0.134 |
| mp-541134 | TeAuBr <sub>8</sub>                                               | 41.207  | 0.117 |
| mp-541240 | Sb <sub>3</sub> O <sub>2</sub> F <sub>5</sub>                     | 31.821  | 2.039 |
| mp-541393 | K <sub>3</sub> NaRe <sub>2</sub> O <sub>9</sub>                   | 68.739  | 0.101 |
| mp-541415 | KH <sub>5</sub> S <sub>2</sub> O <sub>9</sub>                     | 294.862 | 0.281 |
| mp-541459 | KSnPO <sub>5</sub>                                                | 40.672  | 0.241 |
| mp-541656 | AuCl <sub>2</sub>                                                 | 32.778  | 0.169 |
| mp-541682 | K <sub>3</sub> AlAs <sub>2</sub>                                  | 174.942 | 3.335 |
| mp-541684 | K <sub>3</sub> AlP <sub>2</sub>                                   | 282.448 | 2.887 |
| mp-541747 | MgGeH <sub>12</sub> (OF) <sub>6</sub>                             | 64.462  | 1.824 |
| mp-541758 | Ta <sub>2</sub> Se <sub>17</sub> Br <sub>12</sub>                 | 97.06   | 3.078 |
| mp-541766 | Rb <sub>3</sub> InP <sub>2</sub>                                  | 32.043  | 3.071 |
| mp-541771 | Bi <sub>4</sub> RuI <sub>2</sub>                                  | 173.3   | 0.107 |
| mp-541772 | Bi <sub>4</sub> RuBr <sub>2</sub>                                 | 136.43  | 9.824 |
| mp-541867 | CsRe <sub>3</sub> (O <sub>3</sub> F <sub>5</sub> ) <sub>2</sub>   | 1000    | 0.878 |
| mp-541932 | H <sub>13</sub> S <sub>2</sub> N <sub>3</sub> O <sub>8</sub>      | 136.189 | 0.383 |
| mp-542085 | Sr <sub>2</sub> GeO <sub>4</sub>                                  | 47.668  | 1.8   |
| mp-542129 | CsAlBP <sub>2</sub> HO <sub>9</sub>                               | 32.003  | 0.683 |
| mp-542130 | RbAlBP <sub>2</sub> HO <sub>9</sub>                               | 49.159  | 0.649 |
| mp-542148 | Sb <sub>2</sub> N <sub>5</sub> F <sub>11</sub>                    | 177.176 | 0.308 |
| mp-542168 | Cs <sub>2</sub> CoSiO <sub>4</sub>                                | 1000    | 0.27  |
| mp-542417 | Cs <sub>2</sub> MgH <sub>12</sub> (SO <sub>7</sub> ) <sub>2</sub> | 44.707  | 0.99  |
| mp-542451 | Rb <sub>2</sub> NaAl <sub>3</sub> F <sub>12</sub>                 | 317.444 | 0.247 |
| mp-542662 | Ga <sub>2</sub> Te <sub>2</sub> Cl <sub>7</sub>                   | 49.858  | 0.211 |
| mp-542863 | Ca <sub>7</sub> NbSi <sub>4</sub> O <sub>17</sub> F               | 209.533 | 1.229 |
| mp-542931 | Bi <sub>2</sub> B <sub>6</sub> O <sub>15</sub>                    | 1000    | 2.505 |
| mp-546279 | ScBrO                                                             | 49.938  | 0.014 |
| mp-546285 | NbI <sub>3</sub> O                                                | 172.674 | 1.072 |
| mp-547244 | SrBiClO <sub>2</sub>                                              | 153.051 | 0.262 |
| mp-5476   | Cs <sub>4</sub> Mg <sub>3</sub> F <sub>10</sub>                   | 34.135  | 0.178 |
| mp-5504   | BaCO <sub>3</sub>                                                 | 74.578  | 0.283 |
| mp-551456 | Ba <sub>2</sub> CuClO <sub>2</sub>                                | 63.313  | 0.228 |
| mp-552234 | SrBiBrO <sub>2</sub>                                              | 49.199  | 0.251 |
| mp-552537 | Sr <sub>2</sub> CuBrO <sub>2</sub>                                | 235.363 | 0.252 |
| mp-552934 | Ba <sub>2</sub> CuBrO <sub>2</sub>                                | 49.444  | 0.226 |
| mp-554012 | SClO <sub>2</sub> F                                               | 33.774  | 0.116 |
| mp-554016 | K <sub>4</sub> Ti <sub>2</sub> PO <sub>4</sub> F <sub>9</sub>     | 643.841 | 1.237 |
| mp-554111 | Ti <sub>3</sub> Tl <sub>3</sub> (PO <sub>4</sub> ) <sub>5</sub>   | 678.824 | 0.196 |
| mp-554129 | Br <sub>3</sub> N(O <sub>2</sub> F <sub>9</sub> ) <sub>2</sub>    | 1000    | 0.168 |
| mp-554146 | K <sub>14</sub> In <sub>4</sub> O <sub>13</sub>                   | 419.086 | 5.769 |
| mp-554147 | Rb <sub>2</sub> Nb <sub>2</sub> P <sub>2</sub> S <sub>11</sub>    | 1000    | 0.291 |
| mp-554157 | KNaZnP <sub>2</sub> O <sub>7</sub>                                | 56.566  | 2.005 |

|           |                                                      |         |        |
|-----------|------------------------------------------------------|---------|--------|
| mp-554160 | $\text{K}_2\text{CuP}_2\text{O}_7$                   | 37.275  | 0.197  |
| mp-554195 | $\text{Sb}_3\text{As}_2\text{S}_{14}(\text{IF}_8)_3$ | 31.132  | 0.482  |
| mp-554259 | $\text{SrAgB}_2\text{O}_{12}$                        | 1000    | 0.31   |
| mp-554359 | $\text{Cs}_2\text{Si}_3\text{SnO}_9$                 | 38.868  | 0.203  |
| mp-554379 | $\text{AsXeF}_{11}$                                  | 1000    | 0.227  |
| mp-554432 | $\text{ReSbOF}_{10}$                                 | 463.54  | 0.16   |
| mp-554572 | $\text{K}_3\text{NbP}_2\text{O}_9$                   | 69.404  | 0.543  |
| mp-554605 | $\text{Rb}_2\text{SbCl}_3\text{F}_2$                 | 1000    | 0.667  |
| mp-554673 | $\text{KZnB}(\text{PO}_4)_2$                         | 88.009  | 0.285  |
| mp-554686 | $\text{MgAs}_2(\text{XeF}_9)_2$                      | 223.001 | 16.951 |
| mp-554701 | $\text{SbP}(\text{OF}_3)_2$                          | 64.341  | 0.393  |
| mp-554702 | $\text{NaZr}_2\text{NiF}_{11}$                       | 420.641 | 9.413  |
| mp-554754 | $\text{Na}_2\text{Zn}(\text{SO}_4)_2$                | 53.055  | 0.816  |
| mp-554805 | $\text{Sr}_3\text{Se}_3(\text{ClO}_4)_2$             | 153.954 | 0.127  |
| mp-554808 | $\text{SnH}_{22}(\text{Cl}_3\text{O}_5)_2$           | 935.584 | 0.536  |
| mp-554819 | $\text{MgP}_4(\text{Cl}_5\text{O}_3)_2$              | 1000    | 0.531  |
| mp-554842 | $\text{Cs}_5\text{Si}_3\text{AgO}_9$                 | 47.377  | 0.178  |
| mp-554948 | $\text{NaI}(\text{OF})_2$                            | 40.447  | 0.222  |
| mp-555005 | $\text{Na}_3\text{Mg}_2\text{P}_3\text{O}_{16}$      | 116.266 | 0.371  |
| mp-555059 | $\text{TcSb}(\text{OF}_4)_2$                         | 359.496 | 1.834  |
| mp-555076 | $\text{KNaSnF}_6$                                    | 159.092 | 0.229  |
| mp-555082 | $\text{CsLi}_4(\text{BO}_3)_2$                       | 40.755  | 5.418  |
| mp-555113 | $\text{Rb}_3\text{Cu}_2(\text{BiS}_2)_5$             | 141.766 | 0.117  |
| mp-555118 | $\text{NaPO}_3$                                      | 57.932  | 0.275  |
| mp-555122 | $\text{Rb}_2\text{Pd}(\text{NO}_3)_4$                | 101.129 | 0.446  |
| mp-555155 | $\text{KNa}_2\text{Y}(\text{Si}_2\text{O}_5)_3$      | 60.384  | 0.371  |
| mp-555203 | $\text{Sr}_5\text{B}_3\text{ClO}_9$                  | 234.009 | 0.184  |
| mp-555207 | $\text{BN}(\text{OF}_2)_2$                           | 34.134  | 7.495  |
| mp-555212 | $\text{Ba}_2\text{InBrO}_3$                          | 1000    | 0.028  |
| mp-555230 | $\text{Rb}_2\text{YGa}(\text{SiO}_3)_4$              | 1000    | 4.847  |
| mp-555231 | $\text{Ba}_3\text{Bi}_2(\text{PO}_4)_4$              | 53.688  | 7.79   |
| mp-555300 | $\text{Na}_2\text{Zn}_3(\text{SiO}_4)_2$             | 69.291  | 1.275  |
| mp-555305 | $\text{NaNb}(\text{OF})_2$                           | 403.768 | 1.078  |
| mp-555321 | $\text{BaNiF}_4$                                     | 169.746 | 0.304  |
| mp-555376 | $\text{CsAu}(\text{SO}_4)_2$                         | 66.199  | 0.271  |
| mp-555392 | $\text{K}_6\text{NaAu}_2\text{IO}_8$                 | 652.967 | 4.334  |
| mp-555424 | $\text{CaNb}_2(\text{P}_2\text{O}_7)_3$              | 44.872  | 0.4    |
| mp-555467 | $\text{Sr}_2\text{AlCO}_3\text{F}_5$                 | 159.373 | 0.642  |
| mp-555488 | $\text{Na}_5\text{AlP}_2(\text{O}_4\text{F})_2$      | 66.696  | 0.202  |
| mp-555490 | $\text{KRe}_2\text{O}_4\text{F}_7$                   | 96.279  | 0.355  |
| mp-555526 | $\text{RbAg}(\text{NO}_3)_2$                         | 232.719 | 0.066  |
| mp-555546 | $\text{MgAs}_2(\text{XeF}_5)_4$                      | 108.784 | 0.062  |

|           |                                                            |         |       |
|-----------|------------------------------------------------------------|---------|-------|
| mp-555609 | $\text{Sr}_2\text{Zn}_4(\text{CuO})_2$                     | 801.71  | 0.487 |
| mp-555629 | $\text{SbTe}(\text{ClF}_2)_3$                              | 69.559  | 0.011 |
| mp-555652 | $\text{K}_2\text{Zn}(\text{SO}_4)_2$                       | 37.364  | 0.536 |
| mp-555661 | $\text{Ca}_3\text{In}(\text{PO}_4)_7$                      | 33.99   | 0.365 |
| mp-555805 | $\text{AlSCl}_7$                                           | 36.463  | 0.031 |
| mp-555825 | $\text{Na}_4\text{Sc}_2\text{Si}_4\text{O}_{13}$           | 36.896  | 0.341 |
| mp-555862 | $\text{CsZr}(\text{NO}_3)_5$                               | 77.688  | 0.147 |
| mp-555866 | $\text{K}_6\text{Be}_4\text{C}_6\text{O}_{19}$             | 44.85   | 0.263 |
| mp-555958 | $\text{Ba}_2\text{Li}_3(\text{PO}_3)_7$                    | 106.159 | 0.804 |
| mp-555980 | $\text{Ba}_2\text{Zn}_3(\text{PO}_3)_{10}$                 | 34.474  | 99.99 |
| mp-556024 | $\text{Na}_2\text{TiF}_6$                                  | 47.52   | 0.409 |
| mp-556061 | $\text{CsSb}_2\text{F}_{11}$                               | 123.704 | 0.285 |
| mp-556078 | $\text{MgAs}_2(\text{XeF}_8)_2$                            | 64.55   | 0.041 |
| mp-556117 | $\text{Ga}_3\text{Pb}_5\text{F}_{19}$                      | 69.078  | 0.11  |
| mp-556122 | $\text{BaCa}(\text{PO}_3)_4$                               | 42.051  | 2.278 |
| mp-556171 | $\text{CdP}_2\text{Xe}_3\text{F}_{22}$                     | 477.201 | 0.104 |
| mp-556234 | $\text{Rb}_3\text{Sb}_3\text{O}_{14}$                      | 39.634  | 0.224 |
| mp-556244 | $\text{Xe}_2\text{NO}_2\text{F}_{13}$                      | 44.916  | 0.055 |
| mp-556258 | $\text{Na}_3\text{BeAl}(\text{SiO}_4)_2$                   | 246.29  | 0.324 |
| mp-556282 | $\text{Ba}_2\text{AlInO}_5$                                | 1000    | 0.179 |
| mp-556325 | $\text{TeAs}(\text{ClF}_2)_3$                              | 39.371  | 0.543 |
| mp-556341 | $\text{Ti}_4\text{S}_3\text{Br}_6\text{O}$                 | 32.997  | 0.193 |
| mp-556442 | $\text{Tc}_2\text{O}_5\text{F}_4$                          | 1000    | 0.318 |
| mp-556463 | $\text{KGe}_2\text{BO}_6$                                  | 83.005  | 0.232 |
| mp-556518 | $\text{K}_2\text{Pd}(\text{NO}_3)_4$                       | 633.723 | 0.077 |
| mp-556521 | $\text{KNa}_3\text{Pb}_2\text{O}_7$                        | 91.752  | 0.183 |
| mp-556522 | $\text{K}_3\text{Cu}_2(\text{BiS}_2)_5$                    | 497.895 | 0.183 |
| mp-556539 | $\text{BaSb}_2\text{Xe}_3\text{F}_{22}$                    | 236.767 | 0.314 |
| mp-556546 | $\text{K}_2\text{NiF}_4$                                   | 1000    | 0.004 |
| mp-556577 | $\text{Na}_3\text{Sb}_3(\text{AsO}_7)_2$                   | 63.609  | 0.931 |
| mp-556637 | $\text{Ba}_3\text{Na}_2\text{Nb}_2\text{P}_2\text{O}_{17}$ | 721.98  | 0.23  |
| mp-556653 | $\text{Cd}_2\text{BiAsO}_6$                                | 217.158 | 0.35  |
| mp-556655 | $\text{Li}_2\text{AlBO}_4$                                 | 78.779  | 0.681 |
| mp-556676 | $\text{Na}_3\text{Al}_2(\text{AsO}_4)_3$                   | 42.72   | 1.396 |
| mp-556689 | $\text{KZrF}_5$                                            | 176.068 | 3.14  |
| mp-556709 | $\text{Na}_2\text{ZrSiO}_5$                                | 1000    | 4.371 |
| mp-556756 | $\text{KSb}_2\text{PO}_8$                                  | 50.906  | 0.372 |
| mp-556785 | $\text{RbTeF}_5$                                           | 133.757 | 0.072 |
| mp-556801 | $\text{Na}_3\text{B}_3\text{PO}_{13}$                      | 793.714 | 0.299 |
| mp-556834 | $\text{RuCl}(\text{OF}_3)_2$                               | 46.212  | 1.787 |
| mp-556996 | $\text{K}_2\text{LiAlF}_6$                                 | 36.08   | 0.416 |
| mp-557022 | $\text{Sb}_3\text{Cl}_2\text{O}_{11}$                      | 40.821  | 1.939 |

|           |                                                              |         |       |
|-----------|--------------------------------------------------------------|---------|-------|
| mp-557090 | $\text{Bi}_2\text{Au}_3\text{F}_{21}$                        | 35.306  | 0.11  |
| mp-557132 | $\text{Os}_2\text{O}_3\text{F}_7$                            | 88.335  | 0.42  |
| mp-557171 | $\text{Na}_2\text{Cu}(\text{PO}_3)_4$                        | 87.342  | 0.376 |
| mp-557180 | $\text{CaAs}_2(\text{XeF}_5)_4$                              | 59.884  | 0.298 |
| mp-557237 | $\text{K}_5\text{In}_3(\text{SiO}_3)_7$                      | 133.558 | 0.27  |
| mp-557250 | $\text{HgINO}_3$                                             | 146.947 | 0.013 |
| mp-557256 | $\text{RbP}_3\text{PbO}_9$                                   | 90.734  | 0.574 |
| mp-557260 | $\text{RbSb}_2\text{F}_7$                                    | 159.701 | 0.205 |
| mp-557289 | $\text{TiP}_2\text{Cl}_8\text{O}_3$                          | 93.903  | 4.195 |
| mp-557301 | $\text{K}_2\text{Ti}(\text{Si}_2\text{O}_5)_3$               | 37.215  | 1.043 |
| mp-557352 | $\text{CaP}_2\text{Xe}_5\text{F}_{22}$                       | 682.362 | 0.103 |
| mp-557355 | $\text{Rb}_2\text{SiP}_4\text{O}_{13}$                       | 193.087 | 0.236 |
| mp-557359 | $\text{Cs}_2\text{Al}_2\text{Sb}_2\text{O}_7$                | 33.44   | 0.242 |
| mp-557417 | $\text{As}_2\text{Cl}_3\text{OF}_5$                          | 129.94  | 0.329 |
| mp-557432 | $\text{GeClO}_2\text{F}_5$                                   | 495.14  | 0.269 |
| mp-557451 | $\text{CsReOF}_6$                                            | 955.691 | 0.089 |
| mp-557470 | $\text{K}_2\text{Sb}_2\text{S}(\text{O}_2\text{F}_3)_2$      | 68.153  | 1.772 |
| mp-557531 | $\text{Pb}_2\text{S}(\text{O}_2\text{F})_2$                  | 48.772  | 3.899 |
| mp-557577 | $\text{K}_3\text{ScSi}_2\text{O}_7$                          | 167.742 | 0.2   |
| mp-557628 | $\text{AsS}(\text{IF}_3)_2$                                  | 236.93  | 0.406 |
| mp-557650 | $\text{Sr}_3\text{P}_4(\text{N}_4\text{O}_3)_2$              | 170.919 | 0.535 |
| mp-557662 | $\text{Ca}_2\text{Mg}_5\text{Si}_4(\text{O}_{11}\text{F})_2$ | 95.257  | 1.43  |
| mp-557772 | $\text{CsNiF}_3$                                             | 1000    | 0.11  |
| mp-557778 | $\text{RbNbSiO}_5$                                           | 34.827  | 0.273 |
| mp-557792 | $\text{HfSCl}_6\text{O}$                                     | 247.825 | 1.161 |
| mp-557809 | $\text{SbSCl}_9$                                             | 153.663 | 6.751 |
| mp-557856 | $\text{BCl}(\text{OF}_2)_2$                                  | 98.556  | 0.226 |
| mp-557874 | $\text{KAg}(\text{PO}_3)_2$                                  | 32.8    | 1.462 |
| mp-557926 | $\text{CdAs}_2(\text{XeF}_5)_4$                              | 601.337 | 0.069 |
| mp-558063 | $\text{KCu}(\text{BiS}_2)_2$                                 | 92.807  | 0.153 |
| mp-558114 | $\text{Sr}_4\text{NbAlO}_8$                                  | 61.155  | 0.422 |
| mp-558149 | $\text{BF}_3$                                                | 53.123  | 0.141 |
| mp-558153 | $\text{Ba}_4\text{Nb}_2(\text{OF}_4)_3$                      | 698.417 | 1.204 |
| mp-558160 | $\text{NaYCO}_3\text{F}_2$                                   | 1000    | 0.451 |
| mp-558162 | $\text{RbP}(\text{OF})_2$                                    | 35.392  | 0.146 |
| mp-558208 | $\text{RbInAs}_2\text{O}_7$                                  | 66.426  | 0.369 |
| mp-558227 | $\text{K}_2\text{RbMn}_2\text{F}_7$                          | 1000    | 0.049 |
| mp-558235 | $\text{CaTaF}_7$                                             | 1000    | 0.19  |
| mp-558240 | $\text{K}_3\text{Al}_4\text{P}_2\text{O}_8\text{F}_9$        | 739.267 | 1.139 |
| mp-558243 | $\text{Ba}_2\text{InClO}_3$                                  | 1000    | 0.099 |
| mp-558330 | $\text{IClOF}$                                               | 424.422 | 0.011 |
| mp-558383 | $\text{Na}_2\text{CrF}_4$                                    | 69.802  | 0.547 |



|           |                                                                   |         |        |
|-----------|-------------------------------------------------------------------|---------|--------|
| mp-558396 | Rb <sub>2</sub> Te(H <sub>2</sub> O) <sub>5</sub>                 | 44.763  | 0.649  |
| mp-558430 | BaB <sub>2</sub> F <sub>8</sub>                                   | 41.133  | 13.549 |
| mp-558480 | K <sub>2</sub> P <sub>2</sub> O <sub>5</sub> F <sub>2</sub>       | 46.674  | 0.1    |
| mp-558514 | RbZrCdF <sub>7</sub>                                              | 184.495 | 0.136  |
| mp-558523 | PAuClF <sub>3</sub>                                               | 271.612 | 0.213  |
| mp-558603 | K <sub>2</sub> Si <sub>4</sub> O <sub>9</sub>                     | 42.575  | 0.685  |
| mp-558607 | K <sub>3</sub> BSb <sub>4</sub> O <sub>13</sub>                   | 39.33   | 0.646  |
| mp-558660 | Mg <sub>2</sub> BiPO <sub>6</sub>                                 | 112.279 | 0.546  |
| mp-558692 | Sb <sub>2</sub> ClO <sub>2</sub> F <sub>11</sub>                  | 1000    | 0.751  |
| mp-558725 | Ba <sub>3</sub> Ru <sub>2</sub> Br <sub>2</sub> O <sub>9</sub>    | 132.837 | 0.027  |
| mp-558861 | KI(OF) <sub>2</sub>                                               | 124.981 | 0.052  |
| mp-558924 | Na <sub>5</sub> Ga <sub>3</sub> F <sub>14</sub>                   | 59.738  | 7.488  |
| mp-558938 | Zn <sub>4</sub> SiTePbO <sub>10</sub>                             | 38.742  | 0.24   |
| mp-558967 | K <sub>3</sub> Ta <sub>2</sub> S <sub>11</sub>                    | 489.795 | 0.274  |
| mp-559062 | KP(OF) <sub>2</sub>                                               | 38.438  | 0.223  |
| mp-559064 | SnP <sub>2</sub> (Cl <sub>5</sub> O) <sub>2</sub>                 | 559.659 | 0.207  |
| mp-559068 | Na <sub>2</sub> Pd(SeO <sub>4</sub> ) <sub>2</sub>                | 121.657 | 0.059  |
| mp-559115 | P <sub>2</sub> RhClF <sub>6</sub>                                 | 573.669 | 0.257  |
| mp-559150 | Na <sub>4</sub> ZrP <sub>4</sub> ClO <sub>16</sub>                | 198.398 | 4.687  |
| mp-559151 | BaSrTa <sub>2</sub> O <sub>7</sub>                                | 66.558  | 0.423  |
| mp-559182 | P <sub>2</sub> IrClF <sub>6</sub>                                 | 855.904 | 0.708  |
| mp-559228 | Rb <sub>2</sub> HfS <sub>4</sub>                                  | 52.628  | 0.3    |
| mp-559281 | Na <sub>3</sub> Cr <sub>2</sub> (PS <sub>4</sub> ) <sub>3</sub>   | 39.881  | 0.086  |
| mp-559292 | P <sub>6</sub> Pb <sub>3</sub> Xe <sub>11</sub> F <sub>58</sub>   | 1000    | 4.657  |
| mp-559309 | K <sub>3</sub> ZnNCl <sub>4</sub> O <sub>3</sub>                  | 1000    | 0.112  |
| mp-559314 | Na <sub>5</sub> TiP <sub>2</sub> O <sub>9</sub> F                 | 70.316  | 0.501  |
| mp-559378 | Ba <sub>5</sub> Ta <sub>2</sub> Cl <sub>2</sub> O <sub>9</sub>    | 1000    | 0.031  |
| mp-559493 | TiP <sub>2</sub> Cl <sub>2</sub> O                                | 43.309  | 0.14   |
| mp-559516 | K <sub>3</sub> Nb(SO <sub>4</sub> ) <sub>4</sub>                  | 43.967  | 0.193  |
| mp-559533 | NaLiCO <sub>3</sub>                                               | 33.938  | 0.103  |
| mp-559537 | Ca <sub>4</sub> P <sub>6</sub> O <sub>19</sub>                    | 132.46  | 1.134  |
| mp-559568 | K <sub>2</sub> Se <sub>2</sub> O <sub>5</sub>                     | 86.791  | 0.096  |
| mp-559610 | Rb <sub>2</sub> NaAl <sub>2</sub> (PO <sub>4</sub> ) <sub>3</sub> | 1000    | 0.239  |
| mp-559710 | NaInAs <sub>2</sub> O <sub>7</sub>                                | 62.737  | 0.873  |
| mp-559724 | Ta <sub>4</sub> S <sub>9</sub> Br <sub>8</sub>                    | 124.45  | 0.197  |
| mp-559759 | CaAlBO <sub>4</sub>                                               | 143.977 | 0.577  |
| mp-559783 | Na <sub>3</sub> B(PO <sub>4</sub> ) <sub>2</sub>                  | 78.997  | 0.27   |
| mp-559786 | NaAs <sub>4</sub> BrO <sub>6</sub>                                | 46.229  | 0.207  |
| mp-559790 | K <sub>2</sub> Nb <sub>3</sub> Cl <sub>5</sub> O <sub>5</sub>     | 127.361 | 1.499  |
| mp-559894 | Sb <sub>2</sub> Te <sub>2</sub> O <sub>9</sub>                    | 122.821 | 0.616  |
| mp-559923 | Nb(PS <sub>4</sub> ) <sub>2</sub>                                 | 194.05  | 0.231  |
| mp-559984 | Rb <sub>8</sub> AlAu <sub>3</sub> O <sub>4</sub>                  | 50.458  | 0.07   |

|           |                                                                                  |         |        |
|-----------|----------------------------------------------------------------------------------|---------|--------|
| mp-560005 | TlRe <sub>3</sub> (S <sub>2</sub> Cl) <sub>2</sub>                               | 107.313 | 0.163  |
| mp-560008 | PNF <sub>2</sub>                                                                 | 120.224 | 0.266  |
| mp-560032 | NaNb <sub>2</sub> AsO <sub>8</sub>                                               | 42.964  | 2.277  |
| mp-560120 | Na <sub>2</sub> Pd(NO <sub>3</sub> ) <sub>4</sub>                                | 94.265  | 0.22   |
| mp-560121 | H <sub>3</sub> CNO <sub>3</sub>                                                  | 58.023  | 0.253  |
| mp-560144 | K <sub>2</sub> RuBr <sub>5</sub> NO                                              | 49.182  | 0.101  |
| mp-560146 | Ba <sub>17</sub> Y <sub>16</sub> Zn <sub>8</sub> Pt <sub>4</sub> O <sub>57</sub> | 394.031 | 0.335  |
| mp-560208 | K <sub>3</sub> NbAs <sub>2</sub> O <sub>9</sub>                                  | 200.748 | 0.344  |
| mp-560216 | Cs <sub>2</sub> GeP <sub>4</sub> O <sub>13</sub>                                 | 73.782  | 0.213  |
| mp-560222 | Na <sub>3</sub> SO <sub>4</sub> F                                                | 227.406 | 38.747 |
| mp-560310 | SbPOF <sub>8</sub>                                                               | 298.406 | 0.562  |
| mp-560314 | In <sub>2</sub> H <sub>10</sub> S <sub>3</sub> O <sub>17</sub>                   | 57.164  | 0.302  |
| mp-560320 | KBa <sub>2</sub> (PO <sub>3</sub> ) <sub>5</sub>                                 | 50.167  | 25.678 |
| mp-560322 | K <sub>2</sub> RuN <sub>3</sub> Cl <sub>3</sub> O <sub>5</sub>                   | 159.586 | 1.463  |
| mp-560324 | Rb <sub>3</sub> Hg <sub>2</sub> S <sub>3</sub> ClO <sub>12</sub>                 | 82.828  | 1.793  |
| mp-560348 | K <sub>8</sub> Nb <sub>4</sub> S <sub>25</sub>                                   | 97.358  | 1.886  |
| mp-560352 | SrP <sub>2</sub> (XeF <sub>6</sub> ) <sub>3</sub>                                | 1000    | 1.472  |
| mp-560423 | KBS <sub>4</sub> (ClO <sub>3</sub> ) <sub>4</sub>                                | 395.706 | 0.601  |
| mp-560449 | K <sub>3</sub> Ni <sub>2</sub> F <sub>7</sub>                                    | 481.564 | 0.043  |
| mp-560459 | Rb <sub>3</sub> Al <sub>2</sub> (PO <sub>4</sub> ) <sub>3</sub>                  | 1000    | 0.144  |
| mp-560515 | K <sub>4</sub> Ru <sub>2</sub> Cl <sub>10</sub> O                                | 1000    | 0.11   |
| mp-560535 | K <sub>4</sub> Sr(SiO <sub>3</sub> ) <sub>3</sub>                                | 86.342  | 0.434  |
| mp-560555 | Li <sub>8</sub> Bi <sub>2</sub> PdO <sub>10</sub>                                | 71.588  | 0.306  |
| mp-560578 | RbTeNO <sub>3</sub> F <sub>4</sub>                                               | 108.544 | 0.076  |
| mp-560585 | P <sub>3</sub> IrO <sub>9</sub>                                                  | 48.227  | 2.831  |
| mp-560587 | Rb <sub>2</sub> Sb <sub>8</sub> O <sub>13</sub>                                  | 517.656 | 0.284  |
| mp-560595 | Ca <sub>2</sub> AsClO <sub>4</sub>                                               | 115.857 | 0.193  |
| mp-560601 | K <sub>2</sub> CuS(ClO <sub>2</sub> ) <sub>2</sub>                               | 139.292 | 0.084  |
| mp-560629 | K <sub>3</sub> Al <sub>2</sub> (PO <sub>4</sub> ) <sub>3</sub>                   | 1000    | 0.187  |
| mp-560632 | NaGaSiO <sub>4</sub>                                                             | 34.954  | 0.335  |
| mp-560666 | K <sub>4</sub> Nb <sub>2</sub> Se <sub>11</sub> O                                | 47.26   | 0.07   |
| mp-560675 | K <sub>6</sub> Cu(SiO <sub>4</sub> ) <sub>2</sub>                                | 426.588 | 0.206  |
| mp-560692 | K <sub>4</sub> Nb <sub>6</sub> O <sub>17</sub>                                   | 1000    | 0.167  |
| mp-560732 | BaNaZrF <sub>7</sub>                                                             | 35.021  | 0.312  |
| mp-560739 | K <sub>3</sub> Li <sub>3</sub> TeO <sub>6</sub>                                  | 45.633  | 0.224  |
| mp-560745 | AuN <sub>4</sub> O <sub>14</sub>                                                 | 67.498  | 1.168  |
| mp-560884 | TaSCl <sub>1</sub> O                                                             | 62.597  | 0.088  |
| mp-560891 | SnP <sub>2</sub> Cl <sub>8</sub> O <sub>3</sub>                                  | 359.885 | 0.76   |
| mp-560919 | Na <sub>5</sub> Y(CO <sub>3</sub> ) <sub>4</sub>                                 | 1000    | 0.429  |
| mp-560921 | NaAlAs <sub>2</sub> O <sub>7</sub>                                               | 51.672  | 1.582  |
| mp-560928 | Sb <sub>2</sub> IBr <sub>2</sub> F <sub>11</sub>                                 | 306.673 | 0.142  |
| mp-560966 | K <sub>2</sub> RuNCl <sub>5</sub> O                                              | 57.542  | 0.182  |

|           |                                                   |         |        |
|-----------|---------------------------------------------------|---------|--------|
| mp-561011 | $\text{Li}_2\text{Ta}_2(\text{OF}_2)_3$           | 1000    | 0.05   |
| mp-561058 | $\text{Na}_3\text{Ga}(\text{PO}_4)_2$             | 48.779  | 0.936  |
| mp-561153 | $\text{XeF}_3$                                    | 97.709  | 0.132  |
| mp-561176 | $\text{Sb}_2\text{POF}_{13}$                      | 1000    | 0.514  |
| mp-561179 | $\text{Ba}_2\text{CuIO}_2$                        | 31.932  | 0.073  |
| mp-561197 | $\text{TaF}_5$                                    | 60.467  | 0.302  |
| mp-561222 | $\text{K}_2\text{HgBr}_2(\text{NO}_6)_2$          | 859.12  | 0.083  |
| mp-561226 | $\text{BTe}_3(\text{OF}_5)_3$                     | 122.966 | 0.008  |
| mp-561243 | $\text{Sr}_2\text{CuClO}_2$                       | 971.78  | 0.254  |
| mp-561259 | $\text{Na}_3\text{NbOF}_6$                        | 79.154  | 0.099  |
| mp-561283 | $\text{CdGaH}_{14}\text{O}_5\text{F}_5$           | 116.834 | 0.832  |
| mp-561317 | $\text{Rb}_2\text{NiF}_4$                         | 960.056 | 0.03   |
| mp-561369 | $\text{K}_3\text{Bi}_2(\text{AsO}_4)_3$           | 47.834  | 1.006  |
| mp-561396 | $\text{Li}_3\text{CrF}_6$                         | 304.38  | 0.357  |
| mp-561407 | $\text{RbGaS}_2$                                  | 92.366  | 0.046  |
| mp-561424 | $\text{KAlF}_4$                                   | 34.914  | 2.419  |
| mp-561441 | $\text{Y}_2\text{GeO}_5$                          | 44.372  | 3.241  |
| mp-561486 | $\text{Na}_2\text{Mg}_3(\text{PO}_4)_4$           | 54.112  | 4.281  |
| mp-561491 | $\text{KNaMg}_2\text{Si}_4(\text{O}_5\text{F})_2$ | 37.27   | 1.192  |
| mp-5616   | $\text{Sr}_2\text{P}_2\text{O}_7$                 | 126.608 | 0.459  |
| mp-561647 | $\text{Cs}_2\text{TeOF}_4$                        | 110.542 | 0.223  |
| mp-561827 | $\text{Cs}_3\text{TlF}_6$                         | 283.259 | 0.045  |
| mp-562102 | $\text{K}_2\text{S}_2\text{O}_7$                  | 102.082 | 0.347  |
| mp-562441 | $\text{Cs}_3\text{AlO}_3$                         | 65.532  | 0.629  |
| mp-562442 | $\text{Cs}_2\text{SeO}_4$                         | 35.192  | 0.04   |
| mp-562569 | $\text{CsPPbS}_4$                                 | 62.471  | 0.031  |
| mp-562854 | $\text{CsNb}_2\text{BiO}_7$                       | 48.85   | 0.555  |
| mp-562977 | $\text{RbNbS}_2\text{O}_9$                        | 165.859 | 0.29   |
| mp-567441 | $\text{HfIN}$                                     | 391.693 | 0.011  |
| mp-567558 | $\text{CsAgCl}_2$                                 | 1000    | 0.021  |
| mp-567734 | $\text{AlAs}_3(\text{SeCl})_4$                    | 33.796  | 1.937  |
| mp-567743 | $\text{AlSb}_2(\text{TeCl}_2)_2$                  | 200.512 | 1.652  |
| mp-5680   | $\text{Ca}(\text{PO}_3)_2$                        | 59.073  | 0.485  |
| mp-568136 | $\text{RbVBr}_3$                                  | 309.137 | 0.096  |
| mp-568252 | $\text{Rb}_2\text{Hg}_2\text{PdCl}_8$             | 42.372  | 1.636  |
| mp-568346 | $\text{HfBrN}$                                    | 51.766  | 0.015  |
| mp-568350 | $\text{Rb}_2\text{ZnCl}_4$                        | 46.968  | 0.048  |
| mp-568540 | $\text{Ag}_5\text{Hg}_4\text{P}_6\text{Cl}_5$     | 78.325  | 0.549  |
| mp-568644 | $\text{K}_9\text{InSe}_7$                         | 84.025  | 0.066  |
| mp-569050 | $\text{NaW}_6\text{NCl}_{18}$                     | 58.582  | 0.033  |
| mp-569386 | $\text{P}_3\text{NCl}_{12}$                       | 185.278 | 2.406  |
| mp-569442 | $\text{RbAuCl}_4$                                 | 35.445  | 29.085 |

|           |                                                                    |         |       |
|-----------|--------------------------------------------------------------------|---------|-------|
| mp-569787 | Al(BH <sub>4</sub> ) <sub>3</sub>                                  | 40.979  | 0.235 |
| mp-569984 | Cs <sub>3</sub> Au <sub>2</sub> Br <sub>11</sub>                   | 45.806  | 0.086 |
| mp-570021 | Ti <sub>6</sub> Tl <sub>5</sub> AgSe <sub>27</sub>                 | 31.805  | 0.119 |
| mp-570193 | NaAuCl <sub>4</sub>                                                | 96.231  | 0.397 |
| mp-570248 | NaC <sub>2</sub> N <sub>3</sub>                                    | 732.874 | 0.396 |
| mp-570315 | PBr <sub>2</sub> N                                                 | 138.051 | 0.103 |
| mp-570411 | K <sub>12</sub> In <sub>2</sub> Se <sub>9</sub>                    | 35.569  | 0.937 |
| mp-570453 | Ba <sub>4</sub> W(N <sub>2</sub> Cl) <sub>2</sub>                  | 117.175 | 0.04  |
| mp-570530 | Cs(BCl) <sub>6</sub>                                               | 209.746 | 0.184 |
| mp-570531 | NbP <sub>2</sub> NCl <sub>12</sub>                                 | 63.028  | 0.209 |
| mp-570703 | Ca(AlCl <sub>4</sub> ) <sub>2</sub>                                | 35.737  | 0.091 |
| mp-570873 | Nb(Te <sub>2</sub> I <sub>3</sub> ) <sub>2</sub>                   | 160.347 | 1.471 |
| mp-570966 | ZrP <sub>2</sub> NCl <sub>11</sub>                                 | 551.611 | 0.137 |
| mp-571250 | TaP <sub>2</sub> Se <sub>2</sub> Cl <sub>5</sub>                   | 154.827 | 0.906 |
| mp-571324 | CNCl                                                               | 139.842 | 0.116 |
| mp-571464 | RbPSe <sub>3</sub>                                                 | 254.303 | 0.061 |
| mp-572149 | Cs <sub>2</sub> Al(NO <sub>3</sub> ) <sub>5</sub>                  | 61.184  | 0.094 |
| mp-572634 | Al <sub>2</sub> AgCl <sub>5</sub> O                                | 125.095 | 0.128 |
| mp-572794 | ReP(Cl <sub>2</sub> O) <sub>3</sub>                                | 341.005 | 0.7   |
| mp-573373 | PICl <sub>8</sub>                                                  | 115.338 | 0.069 |
| mp-573429 | Cs <sub>5</sub> Bi(MoO <sub>4</sub> ) <sub>4</sub>                 | 557.382 | 0.357 |
| mp-573751 | AlTeCl <sub>7</sub>                                                | 153.106 | 0.754 |
| mp-574571 | Rb <sub>3</sub> YCl <sub>6</sub>                                   | 40.556  | 0.243 |
| mp-579086 | KSrNb <sub>2</sub> O <sub>6</sub> F                                | 1000    | 0.551 |
| mp-581644 | Y <sub>2</sub> Si <sub>2</sub> O <sub>7</sub>                      | 1000    | 0.449 |
| mp-581862 | Cs <sub>2</sub> NaAl(PO <sub>4</sub> ) <sub>2</sub>                | 332.558 | 0.139 |
| mp-581868 | NaY(IO <sub>3</sub> ) <sub>4</sub>                                 | 359.643 | 0.242 |
| mp-581877 | Cs <sub>2</sub> Zr(Si <sub>2</sub> O <sub>5</sub> ) <sub>3</sub>   | 57.396  | 5.294 |
| mp-581887 | Ca <sub>2</sub> As <sub>4</sub> Xe <sub>5</sub> F <sub>34</sub>    | 63.033  | 5.635 |
| mp-581955 | CsSi <sub>2</sub> SbO <sub>7</sub>                                 | 197.604 | 0.25  |
| mp-581967 | Nb <sub>2</sub> O <sub>5</sub>                                     | 1000    | 2.407 |
| mp-582185 | Cs <sub>12</sub> Nb(In <sub>2</sub> As <sub>3</sub> ) <sub>3</sub> | 67.481  | 0.081 |
| mp-5824   | Hg <sub>2</sub> NO <sub>4</sub>                                    | 83.125  | 0.135 |
| mp-5860   | K <sub>2</sub> HgO <sub>2</sub>                                    | 265.232 | 0.245 |
| mp-6032   | SrSi <sub>2</sub> (BO <sub>4</sub> ) <sub>2</sub>                  | 53.015  | 0.656 |
| mp-6044   | Sr <sub>6</sub> B(PO <sub>4</sub> ) <sub>5</sub>                   | 43.039  | 0.478 |
| mp-607454 | AlC <sub>3</sub> (NCl <sub>2</sub> ) <sub>3</sub>                  | 1000    | 3.602 |
| mp-607931 | Cs <sub>3</sub> NaLi <sub>2</sub> (BO <sub>3</sub> ) <sub>2</sub>  | 49.754  | 0.263 |
| mp-607987 | CsInI <sub>4</sub>                                                 | 67.231  | 0.209 |
| mp-6138   | Na <sub>2</sub> TiSiO <sub>5</sub>                                 | 79.548  | 0.954 |
| mp-619575 | ClF <sub>3</sub>                                                   | 35.294  | 0.256 |
| mp-619651 | Cs <sub>3</sub> AlP <sub>2</sub>                                   | 38.807  | 0.132 |

|           |                                                                  |         |         |
|-----------|------------------------------------------------------------------|---------|---------|
| mp-620652 | NaSr <sub>2</sub> AlP <sub>3</sub>                               | 36.89   | 0.28    |
| mp-621112 | Cs <sub>5</sub> Nb <sub>2</sub> S <sub>4</sub> Cl <sub>9</sub>   | 272.652 | 0.07    |
| mp-622018 | BAs <sub>4</sub> (Pb <sub>3</sub> O <sub>10</sub> ) <sub>2</sub> | 70.951  | 0.321   |
| mp-622195 | CsSO <sub>3</sub> F                                              | 88.405  | 0.213   |
| mp-622197 | Cs <sub>2</sub> PtS <sub>4</sub> (O <sub>3</sub> F) <sub>6</sub> | 131.553 | 0.017   |
| mp-6228   | Na <sub>2</sub> TiGeO <sub>5</sub>                               | 85.596  | 0.804   |
| mp-6238   | Ba <sub>2</sub> Ta <sub>6</sub> Te <sub>2</sub> O <sub>21</sub>  | 44.8    | 0.792   |
| mp-624117 | Cs <sub>3</sub> V <sub>4</sub> Te <sub>2</sub> ClO <sub>14</sub> | 1000    | 0.036   |
| mp-6245   | K <sub>5</sub> Nb <sub>4</sub> O <sub>12</sub> F                 | 129.922 | 2.068   |
| mp-625054 | AlHO <sub>2</sub>                                                | 1000    | 0.259   |
| mp-625475 | H <sub>2</sub> SO <sub>4</sub>                                   | 40.897  | 1.399   |
| mp-625661 | H <sub>3</sub> BrO <sub>4</sub>                                  | 1000    | 0.478   |
| mp-625801 | Sr(H <sub>2</sub> O <sub>5</sub> ) <sub>2</sub>                  | 95.192  | 0.342   |
| mp-626256 | H <sub>3</sub> NO <sub>4</sub>                                   | 55.31   | 0.265   |
| mp-626785 | KHO                                                              | 114.588 | 0.405   |
| mp-6289   | Ba <sub>2</sub> Ti(GeO <sub>4</sub> ) <sub>2</sub>               | 121.385 | 0.453   |
| mp-628908 | KICl <sub>2</sub>                                                | 46.662  | 0.455   |
| mp-6310   | Ba <sub>3</sub> Y(BO <sub>3</sub> ) <sub>3</sub>                 | 976.503 | 0.128   |
| mp-634378 | NaHSO <sub>4</sub>                                               | 49.087  | 1.167   |
| mp-638009 | RbPPbS <sub>4</sub>                                              | 39.253  | 0.035   |
| mp-6390   | Rb <sub>3</sub> Ti <sub>3</sub> (PO <sub>4</sub> ) <sub>5</sub>  | 1000    | 0.242   |
| mp-640389 | Cs <sub>2</sub> Th(PS <sub>3</sub> ) <sub>3</sub>                | 302.791 | 8.789   |
| mp-642795 | PHSF <sub>2</sub>                                                | 73.515  | 0.021   |
| mp-642834 | BaH <sub>5</sub> ClO <sub>3</sub>                                | 72.881  | 0.041   |
| mp-643253 | Ba <sub>2</sub> H <sub>4</sub> Pt                                | 31.36   | 0.211   |
| mp-643265 | ReF <sub>7</sub>                                                 | 422.213 | 0.008   |
| mp-643586 | CsHS <sub>2</sub> (O <sub>3</sub> F) <sub>2</sub>                | 76.692  | 1.675   |
| mp-643902 | SnH <sub>4</sub> (NF) <sub>2</sub>                               | 78.116  | 0.705   |
| mp-6441   | K <sub>2</sub> PO <sub>3</sub> F                                 | 50.092  | 0.079   |
| mp-644129 | KNiPH <sub>2</sub> O <sub>5</sub>                                | 938.959 | 0.277   |
| mp-644828 | AuXe <sub>2</sub> F <sub>17</sub>                                | 1000    | 0.14    |
| mp-645272 | TiV <sub>3</sub> (SeO <sub>6</sub> ) <sub>2</sub>                | 455.777 | 0.204   |
| mp-6459   | CaMg(CO <sub>3</sub> ) <sub>2</sub>                              | 119.968 | 0.309   |
| mp-6467   | Na <sub>2</sub> CuP <sub>2</sub> O <sub>7</sub>                  | 50.354  | 102.781 |
| mp-647342 | SbP <sub>3</sub> C(NCl <sub>5</sub> ) <sub>3</sub>               | 751.922 | 0.221   |
| mp-647385 | V <sub>2</sub> Pb <sub>4</sub> O <sub>9</sub>                    | 154.813 | 0.285   |
| mp-6481   | Na <sub>2</sub> ZnSi <sub>3</sub> O <sub>8</sub>                 | 112.155 | 1.269   |
| mp-648414 | V <sub>2</sub> PS <sub>10</sub>                                  | 111.788 | 0.621   |
| mp-648932 | Nb <sub>2</sub> PS <sub>10</sub>                                 | 80.488  | 0.037   |
| mp-649253 | NbClF <sub>8</sub>                                               | 45.933  | 0.245   |
| mp-649616 | Pd(XeF <sub>8</sub> ) <sub>2</sub>                               | 1000    | 0.082   |
| mp-6500   | KRb <sub>2</sub> ScF <sub>6</sub>                                | 35.602  | 4.966   |

|           |                                                                   |         |        |
|-----------|-------------------------------------------------------------------|---------|--------|
| mp-651786 | $\text{Ca}_5\text{MnSi}_4(\text{Pb}_3\text{O}_{11})_3$            | 37.442  | 0.225  |
| mp-652776 | $\text{Rb}_2\text{V}(\text{PO}_4)_2$                              | 350.147 | 0.364  |
| mp-653633 | $\text{K}_2\text{ZnCl}_4$                                         | 87.449  | 0.098  |
| mp-653973 | $\text{KZnPO}_4$                                                  | 134.445 | 0.194  |
| mp-654447 | $\text{Ni}(\text{XeF}_8)_2$                                       | 41.006  | 0.147  |
| mp-6648   | $\text{KLiB}_4\text{O}_7$                                         | 36.928  | 0.518  |
| mp-6651   | $\text{K}_2\text{Ta}_2(\text{OF}_2)_3$                            | 475.867 | 0.356  |
| mp-667283 | $\text{Sr}_3\text{Re}_3\text{ClO}_{15}$                           | 37.373  | 0.158  |
| mp-667292 | $\text{K}_2\text{MgSi}_5\text{O}_{12}$                            | 206.73  | 0.298  |
| mp-667305 | $\text{ReN}(\text{OF}_2)_3$                                       | 391.443 | 0.587  |
| mp-667326 | $\text{K}_5\text{InO}_4$                                          | 184.588 | 10.983 |
| mp-667360 | $\text{CsSbOF}_4$                                                 | 629.926 | 0.162  |
| mp-667379 | $\text{Ba}_7\text{Al}_{64}\text{O}_{103}$                         | 109.608 | 0.203  |
| mp-6675   | $\text{Na}_2\text{Zn}(\text{SiO}_3)_2$                            | 96.215  | 0.326  |
| mp-669455 | $\text{Ga}_4\text{Hg}_{11}(\text{AsBr}_4)_4$                      | 102.079 | 0.099  |
| mp-669508 | $\text{TaP}_2\text{NCl}_{12}$                                     | 75.83   | 0.182  |
| mp-6698   | $\text{Th}_2\text{Cu}(\text{PO}_4)_3$                             | 1000    | 2.524  |
| mp-672212 | $\text{NaNb}_{13}\text{O}_{33}$                                   | 1000    | 0.405  |
| mp-672248 | $\text{TaAsP}_{13}\text{Cl}_{13}$                                 | 48.458  | 0.049  |
| mp-6748   | $\text{Cs}_2\text{Ti}(\text{Si}_2\text{O}_5)_3$                   | 82.248  | 3.768  |
| mp-6759   | $\text{BaGa}_2(\text{SiO}_4)_2$                                   | 56.289  | 2.6    |
| mp-676130 | $\text{TlSnF}_3$                                                  | 144.508 | 7.066  |
| mp-676501 | $\text{K}_3\text{Sn}_2\text{S}_3\text{BrO}_{12}$                  | 295.104 | 1.289  |
| mp-676801 | $\text{K}_7\text{Th}_6\text{F}_{31}$                              | 698.275 | 0.254  |
| mp-677192 | $\text{K}_4\text{PH}_5\text{S}_3\text{O}_{16}$                    | 815.19  | 0.795  |
| mp-677248 | $\text{Ca}_2\text{AlH}_{10}\text{IO}_8$                           | 53.719  | 16.91  |
| mp-677416 | $\text{Na}_5\text{Mg}_5\text{In}_3(\text{SO}_4)_{12}$             | 1000    | 0.702  |
| mp-677520 | $\text{KBa}_6\text{Zn}_4(\text{GaO}_3)_7$                         | 52.738  | 0.308  |
| mp-677638 | $\text{Na}_{27}\text{Ca}_3\text{Al}_4(\text{P}_2\text{O}_7)_{12}$ | 1000    | 8.195  |
| mp-679989 | $\text{Bi}(\text{Mo}_2\text{Cl}_5)_3$                             | 218.163 | 0.062  |
| mp-679997 | $\text{CsAg}_2(\text{B}_5\text{O}_8)_3$                           | 356.693 | 0.33   |
| mp-680198 | $\text{Cs}_4\text{Th}_2\text{P}_5\text{Se}_{17}$                  | 82.617  | 0.143  |
| mp-680240 | $\text{Sb}_2\text{Cl}_5\text{F}_4$                                | 33.179  | 0.219  |
| mp-680284 | $\text{Rb}_6\text{Ta}_4\text{S}_{25}$                             | 186.505 | 0.261  |
| mp-680374 | $\text{KAlSiO}_4$                                                 | 138.265 | 0.203  |
| mp-680410 | $\text{K}_3\text{Nb}_2\text{S}_{11}$                              | 61.395  | 0.332  |
| mp-680498 | $\text{RbTaPS}_6$                                                 | 80.361  | 2.623  |
| mp-680683 | $\text{CsB}_9\text{O}_{14}$                                       | 34.013  | 0.282  |
| mp-683918 | $\text{RbC}_2\text{N}_3$                                          | 177.231 | 0.553  |
| mp-683925 | $\text{CsSb}_3\text{F}_{16}$                                      | 1000    | 0.107  |
| mp-683949 | $\text{AlP}_3(\text{NCl}_3)_3$                                    | 69.515  | 0.152  |
| mp-683955 | $\text{KTaPS}_6$                                                  | 52.34   | 0.226  |

|           |                              |         |        |
|-----------|------------------------------|---------|--------|
| mp-684010 | $K_8Ti_3P_2(O_4F_{11})_2$    | 1000    | 1.179  |
| mp-684018 | $SrBa_8O_{13}$               | 263.004 | 0.967  |
| mp-6841   | $Ba_4NaCu(CO_5)_2$           | 1000    | 0.264  |
| mp-685352 | $Ca_2NF$                     | 1000    | 0.344  |
| mp-685478 | $Na_2PdO_3$                  | 98.993  | 0.155  |
| mp-685810 | $AsN_2F_7$                   | 162.828 | 0.393  |
| mp-686464 | $Ca_{10}P_8SO_{24}$          | 43.127  | 0.311  |
| mp-6867   | $KCaCO_3F$                   | 1000    | 0.07   |
| mp-6870   | $KBe_2BO_3F_2$               | 109.536 | 0.207  |
| mp-6903   | $Na_2Ca_4ZrNbSi_4O_{17}F$    | 36.766  | 8.604  |
| mp-693620 | $KCa_2Be_2Al(Si_2O_5)_6$     | 100.95  | 0.435  |
| mp-693753 | $BaNa_5Ca_7P_4(O_8F)_3$      | 1000    | 1.963  |
| mp-695043 | $K_4PH_5Se_3O_{16}$          | 478.105 | 0.747  |
| mp-695963 | $K_2NaH_{10}IO_{10}$         | 48.679  | 0.261  |
| mp-696078 | $K_3ZrH_2S(OF)_5$            | 439.921 | 2.645  |
| mp-696189 | $TiH_4(NO_4)_3$              | 99.081  | 0.152  |
| mp-696379 | $BH_3OF_4$                   | 37.357  | 3.303  |
| mp-696396 | $NaHCO_3$                    | 31.92   | 2.498  |
| mp-696497 | $Mg_3Si_4(HO_6)_2$           | 58.268  | 0.557  |
| mp-696528 | $KPH_3NO_3$                  | 44.836  | 4.123  |
| mp-696656 | $BH_4O_2F_3$                 | 37.681  | 0.218  |
| mp-696683 | $K_3SnHF_8$                  | 752.93  | 0.156  |
| mp-696940 | $TiH_{12}C_2(NF)_6$          | 137.98  | 0.26   |
| mp-697078 | $Cs_2SiP_4(HO_7)_2$          | 401.69  | 20.004 |
| mp-697253 | $SiH_{12}C_2(NF)_6$          | 263.583 | 0.386  |
| mp-698063 | $Na_2P_2H_2O_7$              | 106.778 | 0.494  |
| mp-698479 | $RbTeHOF_4$                  | 939.074 | 0.462  |
| mp-699453 | $RbAs_2H_8O_8$               | 36.257  | 0.152  |
| mp-7012   | $KRb_2YF_6$                  | 31.408  | 21.638 |
| mp-703476 | $P_2H_{16}N_4O_7$            | 132.497 | 0.194  |
| mp-704408 | $K_8V_2(S_2O_9)_3$           | 1000    | 0.212  |
| mp-7049   | $ZrTiCuS_3$                  | 35.098  | 0.119  |
| mp-705134 | $In_2(MoO_4)_3$              | 42.359  | 0.916  |
| mp-705514 | $SbHC_3(NCl_3)_3$            | 44.952  | 0.879  |
| mp-705900 | $Hf_3Ti_{10}Mo_{12}PbO_{48}$ | 39.2    | 0.133  |
| mp-706239 | $NaCa_2Mg_2V_3O_{12}$        | 42.547  | 0.262  |
| mp-706243 | $Al_2Si_3H_4(NO_5)_2$        | 1000    | 0.359  |
| mp-706386 | $ZrH_6O_3F_4$                | 63.275  | 0.796  |
| mp-706631 | $Na_2B_3HO_6$                | 63.635  | 0.59   |
| mp-706976 | $PH_4N(OF)_2$                | 66.979  | 0.313  |
| mp-706986 | $PH_4NO_3$                   | 44.736  | 0.167  |
| mp-706995 | $ZnCoH_{18}N_6Cl_5$          | 361.971 | 0.28   |

|           |                                                           |         |        |
|-----------|-----------------------------------------------------------|---------|--------|
| mp-707195 | $\text{KSiHO}_3$                                          | 65.447  | 0.264  |
| mp-707219 | $\text{K}_2\text{Zr}_2\text{ZnH}_{12}(\text{OF}_2)_6$     | 1000    | 0.892  |
| mp-707343 | $\text{ZrH}_{12}\text{C}_2(\text{NF})_6$                  | 73.812  | 1.041  |
| mp-707443 | $\text{Na}_7\text{AlH}_2\text{C}_4(\text{O}_3\text{F})_4$ | 131.212 | 0.387  |
| mp-707453 | $\text{K}_5\text{NaP}_3(\text{HO}_4)_3$                   | 1000    | 0.157  |
| mp-707536 | $\text{KHSeO}_4$                                          | 132.704 | 0.192  |
| mp-707782 | $\text{K}_6\text{Zr}_3\text{H}_8(\text{OF})_{12}$         | 1000    | 0.193  |
| mp-707960 | $\text{ZnH}_{12}\text{C}_2(\text{N}_3\text{Cl}_2)_2$      | 112.254 | 0.046  |
| mp-7089   | $\text{KMgSb}$                                            | 36.129  | 0.033  |
| mp-708961 | $\text{BeH}_8\text{SeO}_8$                                | 33.064  | 0.274  |
| mp-709350 | $\text{Sr}_5\text{As}_8\text{HO}_{18}$                    | 1000    | 0.253  |
| mp-720104 | $\text{Na}_4\text{Al}_3\text{Ge}_3\text{NO}_{14}$         | 53.887  | 0.331  |
| mp-720294 | $\text{AsH}_{18}\text{N}_3\text{O}_7$                     | 337.227 | 0.666  |
| mp-720583 | $\text{Na}_3\text{B}_3\text{H}_2\text{O}_7$               | 145.069 | 0.527  |
| mp-720586 | $\text{CaH}_4\text{NClO}_5$                               | 34.626  | 0.206  |
| mp-720642 | $\text{NaB}_3\text{H}_4\text{O}_7$                        | 49.166  | 1.45   |
| mp-721182 | $\text{PH}_{11}(\text{NO}_2)_2$                           | 44.086  | 0.182  |
| mp-721471 | $\text{CuPH}_4\text{OF}$                                  | 269.346 | 34.574 |
| mp-722246 | $\text{SiH}_{10}(\text{O}_2\text{F}_3)_2$                 | 38.043  | 2.323  |
| mp-722272 | $\text{Li}_2\text{H}_{12}\text{C}_3\text{SN}_6\text{O}_7$ | 115.551 | 0.586  |
| mp-722832 | $\text{PH}_3\text{NF}_5$                                  | 64.284  | 0.278  |
| mp-722900 | $\text{CaH}_3\text{NO}_5$                                 | 32.128  | 0.104  |
| mp-723109 | $\text{BeH}_{14}(\text{I}_2\text{O}_9)_2$                 | 1000    | 0.369  |
| mp-730154 | $\text{NaAs}_3\text{H}_2\text{O}_9$                       | 35.605  | 5.748  |
| mp-730460 | $\text{Na}_5\text{H}_3(\text{CO}_3)_4$                    | 195.525 | 0.056  |
| mp-7323   | $\text{RbBe}_2\text{BO}_3\text{F}_2$                      | 117.107 | 0.206  |
| mp-733468 | $\text{K}_2\text{PHO}_4$                                  | 739.107 | 0.15   |
| mp-733637 | $\text{NaH}_8\text{O}_5$                                  | 67.917  | 1.355  |
| mp-733655 | $\text{KH}_3(\text{SO}_4)_2$                              | 151.232 | 12.43  |
| mp-734042 | $\text{MgH}_{12}(\text{NO}_6)_2$                          | 108.906 | 0.289  |
| mp-735541 | $\text{NiSn}_2\text{H}_{12}(\text{OF})_6$                 | 212.651 | 0.901  |
| mp-7404   | $\text{Na}_3\text{SbO}_4$                                 | 55.058  | 15.818 |
| mp-740714 | $\text{LiB}_5\text{H}_2\text{O}_9$                        | 44.43   | 0.343  |
| mp-741045 | $\text{Na}_4\text{AlP}_2\text{HO}_9$                      | 186.599 | 0.606  |
| mp-743538 | $\text{CrH}_{18}(\text{O}_3\text{F})_3$                   | 48.72   | 0.118  |
| mp-744205 | $\text{K}_2\text{Cr}_2\text{AsHO}_{10}$                   | 1000    | 0.299  |
| mp-744625 | $\text{ZnCrH}_{15}\text{N}_4\text{Cl}_4\text{F}$          | 271.211 | 0.273  |
| mp-744751 | $\text{NaMn}_6\text{Al}_3\text{H}_{42}(\text{SO}_{19})_2$ | 1000    | 0.155  |
| mp-745159 | $\text{MoPH}_3\text{O}_7$                                 | 87.865  | 0.928  |
| mp-745166 | $\text{Sr}_2\text{Fe}_2\text{H}_2\text{OF}_{10}$          | 38.365  | 0.295  |
| mp-7470   | $\text{RbCuO}$                                            | 57.385  | 0.057  |
| mp-752709 | $\text{InBP}_2\text{H}_5\text{NO}_9$                      | 31.437  | 0.513  |



|           |                                                                 |         |       |
|-----------|-----------------------------------------------------------------|---------|-------|
| mp-753353 | $\text{Sr}_4\text{LiCu}(\text{CO}_5)_2$                         | 1000    | 0.306 |
| mp-753798 | $\text{Rb}_2\text{SnO}_3$                                       | 33.412  | 0.183 |
| mp-753854 | $\text{Rb}_2\text{PH}_3\text{SeO}_8$                            | 39.743  | 5.369 |
| mp-754370 | $\text{Ba}_3\text{GeO}_5$                                       | 52.945  | 0.209 |
| mp-755428 | $\text{Rb}_3\text{ClO}$                                         | 55.311  | 0.053 |
| mp-755663 | $\text{Ta}_2\text{Pb}_2\text{O}_7$                              | 99.902  | 0.396 |
| mp-756748 | $\text{ScH}_3(\text{ClO}_5)_2$                                  | 835.572 | 4.337 |
| mp-756769 | $\text{Na}_2\text{TlPCO}_7$                                     | 83.096  | 0.272 |
| mp-756981 | $\text{K}_2\text{SbPCO}_7$                                      | 551.023 | 0.353 |
| mp-757218 | $\text{K}_4\text{Na}_2\text{H}_{18}\text{Pd}(\text{IO}_{10})_2$ | 1000    | 0.481 |
| mp-757594 | $\text{Os}(\text{OF}_2)_2$                                      | 112.018 | 0.01  |
| mp-757723 | $\text{SrH}_4(\text{SO}_4)_3$                                   | 140.54  | 0.49  |
| mp-757840 | $\text{Ba}_4(\text{PtO}_3)_3$                                   | 31.053  | 3.692 |
| mp-757850 | $\text{K}_4\text{Sb}_2\text{O}_5$                               | 57.992  | 0.039 |
| mp-757878 | $\text{Na}_4\text{Cu}(\text{HO}_2)_2$                           | 75.359  | 0.175 |
| mp-757963 | $\text{K}_2\text{MgH}_4(\text{CO}_5)_2$                         | 36.138  | 0.647 |
| mp-757981 | $\text{Na}_2\text{SnGe}_2(\text{HO}_4)_2$                       | 32.916  | 0.647 |
| mp-758007 | $\text{Ba}_2\text{CaP}_4(\text{H}_3\text{O}_8)_2$               | 50.442  | 1.053 |
| mp-758103 | $\text{YH}_2(\text{CO}_3)_2$                                    | 146.8   | 0.238 |
| mp-758337 | $\text{Ca}_2\text{P}_6\text{O}_{17}$                            | 50.269  | 1.052 |
| mp-758814 | $\text{CaAs}_2\text{H}_6\text{F}_{18}$                          | 128.146 | 0.415 |
| mp-758948 | $\text{Cs}_2\text{H}_6\text{CO}_6$                              | 64.982  | 0.166 |
| mp-758957 | $\text{As}_2\text{HPbF}_{13}$                                   | 77.247  | 0.128 |
| mp-759223 | $\text{Sn}(\text{SO}_4)_2$                                      | 31.634  | 0.326 |
| mp-759344 | $\text{P}_3\text{H}_{30}\text{N}_4\text{O}_{12}$                | 617.373 | 1.643 |
| mp-7594   | $\text{CsLiF}_2$                                                | 69.014  | 0.23  |
| mp-759651 | $\text{ScH}_6\text{Br}_3\text{N}_2$                             | 71.267  | 2.943 |
| mp-759900 | $\text{K}_2\text{LiNbO}_4$                                      | 150.376 | 0.332 |
| mp-760046 | $\text{LiPH}_{21}\text{S}_3\text{N}_7$                          | 54.395  | 0.713 |
| mp-760417 | $\text{Rb}_4\text{I}_2\text{O}$                                 | 266.004 | 0.017 |
| mp-760678 | $\text{Sb}_2\text{H}_4\text{AuF}_{16}$                          | 155.061 | 0.163 |
| mp-760762 | $\text{NbOF}_3$                                                 | 92.699  | 0.374 |
| mp-761252 | $\text{RbPH}_3\text{O}_4\text{F}$                               | 48.893  | 0.73  |
| mp-762082 | $\text{ThH}_{10}\text{N}_4\text{O}_{17}$                        | 78.29   | 0.097 |
| mp-762295 | $\text{K}_2\text{Mn}_3\text{V}_2(\text{HO}_5)_2$                | 147.196 | 0.871 |
| mp-764233 | $\text{Na}_8\text{CoO}_6$                                       | 154.44  | 0.084 |
| mp-765136 | $\text{LiMn}_8\text{F}_{33}$                                    | 385.197 | 0.256 |
| mp-765597 | $\text{HS}_2\text{IO}_8$                                        | 48.891  | 0.774 |
| mp-766175 | $\text{RbInBP}_2\text{HO}_9$                                    | 32.36   | 0.629 |
| mp-767430 | $\text{Na}_3\text{CdPCO}_7$                                     | 36.525  | 0.397 |
| mp-767521 | $\text{Na}_2\text{InPCO}_7$                                     | 84.543  | 0.284 |
| mp-767722 | $\text{VFe}(\text{P}_2\text{O}_7)_2$                            | 36.389  | 0.319 |

|           |                                                                  |         |       |
|-----------|------------------------------------------------------------------|---------|-------|
| mp-768144 | Na <sub>2</sub> SbPCO <sub>7</sub>                               | 115.289 | 0.367 |
| mp-768368 | K <sub>4</sub> I <sub>2</sub> O                                  | 119.281 | 0.02  |
| mp-768670 | K <sub>3</sub> MgPCO <sub>7</sub>                                | 64.208  | 0.387 |
| mp-769604 | K <sub>2</sub> MnPCO <sub>7</sub>                                | 1000    | 0.249 |
| mp-769616 | Na <sub>2</sub> CrPCO <sub>7</sub>                               | 97.502  | 0.324 |
| mp-769971 | BaGa <sub>4</sub> O <sub>7</sub>                                 | 226.992 | 0.688 |
| mp-770773 | Rb <sub>2</sub> S <sub>2</sub> O <sub>7</sub>                    | 119.558 | 3.982 |
| mp-770839 | LiCr(CO <sub>3</sub> ) <sub>2</sub>                              | 76.429  | 0.182 |
| mp-770968 | Na <sub>3</sub> NiPCO <sub>7</sub>                               | 314.864 | 0.702 |
| mp-771127 | Rb <sub>4</sub> TiO <sub>4</sub>                                 | 63.485  | 0.462 |
| mp-771139 | Cs <sub>4</sub> HfO <sub>4</sub>                                 | 46.969  | 1.76  |
| mp-771185 | K <sub>2</sub> Ge <sub>2</sub> O <sub>5</sub>                    | 55.224  | 2.356 |
| mp-771255 | Cs <sub>4</sub> SiO <sub>4</sub>                                 | 76.117  | 2.087 |
| mp-772228 | CdP <sub>4</sub> O <sub>11</sub>                                 | 102.459 | 3.327 |
| mp-772808 | K <sub>2</sub> BiPCO <sub>7</sub>                                | 77.839  | 0.276 |
| mp-773432 | KMnPCO <sub>7</sub>                                              | 98.931  | 0.32  |
| mp-774848 | H <sub>10</sub> SeO <sub>8</sub>                                 | 72.129  | 0.19  |
| mp-775198 | Ti <sub>3</sub> P <sub>6</sub> WO <sub>24</sub>                  | 171.429 | 0.204 |
| mp-775430 | LiBi <sub>3</sub> (IO <sub>2</sub> ) <sub>2</sub>                | 44.344  | 0.196 |
| mp-775466 | K <sub>2</sub> InSi <sub>4</sub> HO <sub>11</sub>                | 69.994  | 0.366 |
| mp-778977 | CaAs <sub>2</sub> HF <sub>13</sub>                               | 231.203 | 0.229 |
| mp-8065   | K <sub>2</sub> Ti <sub>6</sub> O <sub>13</sub>                   | 33.153  | 6.088 |
| mp-8201   | Rb <sub>3</sub> PdF <sub>5</sub>                                 | 66.954  | 0.283 |
| mp-8226   | ThNF                                                             | 1000    | 0.224 |
| mp-8333   | RbNaSnF <sub>6</sub>                                             | 165.123 | 0.156 |
| mp-8416   | BaCaGaF <sub>7</sub>                                             | 139.816 | 0.425 |
| mp-8449   | Rb <sub>2</sub> Li <sub>2</sub> SiO <sub>4</sub>                 | 34.593  | 0.643 |
| mp-8450   | Rb <sub>2</sub> Li <sub>2</sub> GeO <sub>4</sub>                 | 41.311  | 0.822 |
| mp-849311 | MgSb <sub>2</sub> H <sub>2</sub> F <sub>14</sub>                 | 34.571  | 0.166 |
| mp-849433 | SrTiH <sub>4</sub> (OF <sub>3</sub> ) <sub>2</sub>               | 307.592 | 1.802 |
| mp-849805 | B <sub>12</sub> H <sub>21</sub> C <sub>4</sub> S <sub>2</sub> I  | 163.805 | 0.749 |
| mp-8570   | Ba <sub>3</sub> Zr <sub>2</sub> S <sub>7</sub>                   | 46.359  | 0.059 |
| mp-8603   | RbAgO                                                            | 116.333 | 0.048 |
| mp-863420 | Rb <sub>4</sub> H <sub>4</sub> C <sub>3</sub> O <sub>10</sub>    | 274.258 | 0.339 |
| mp-865427 | KSrCO <sub>3</sub> F                                             | 1000    | 0.06  |
| mp-865500 | Na <sub>2</sub> Hf <sub>2</sub> O <sub>5</sub>                   | 1000    | 0.164 |
| mp-866311 | Bi <sub>3</sub> BrO <sub>4</sub>                                 | 950.861 | 0.386 |
| mp-866620 | Cs <sub>2</sub> MgP <sub>4</sub> (HO <sub>2</sub> ) <sub>8</sub> | 78.205  | 0.036 |
| mp-866638 | KSc(BH <sub>4</sub> ) <sub>4</sub>                               | 44.707  | 0.141 |
| mp-867261 | RbSrCO <sub>3</sub> F                                            | 1000    | 0.057 |
| mp-867300 | Rb <sub>2</sub> Hf <sub>2</sub> O <sub>5</sub>                   | 449.153 | 0.141 |
| mp-867975 | CsB <sub>2</sub> H <sub>5</sub> O <sub>6</sub>                   | 43.616  | 0.124 |

|         |                                                                   |         |        |
|---------|-------------------------------------------------------------------|---------|--------|
| mp-8708 | Mg(AuF <sub>4</sub> ) <sub>2</sub>                                | 49.625  | 0.241  |
| mp-8796 | Sr <sub>2</sub> LiSc(B <sub>2</sub> O <sub>5</sub> ) <sub>2</sub> | 1000    | 1.371  |
| mp-8810 | SrZn <sub>2</sub> (PO <sub>4</sub> ) <sub>2</sub>                 | 36.547  | 0.439  |
| mp-8892 | LiInF <sub>4</sub>                                                | 46.764  | 0.275  |
| mp-8962 | Rb <sub>2</sub> HgF <sub>4</sub>                                  | 1000    | 0.036  |
| mp-8963 | Cs <sub>2</sub> HgF <sub>4</sub>                                  | 841.758 | 0.027  |
| mp-8985 | Ba <sub>2</sub> YC <sub>2</sub> (O <sub>2</sub> F) <sub>3</sub>   | 120.528 | 0.116  |
| mp-8989 | Na <sub>2</sub> P <sub>2</sub> PdO <sub>7</sub>                   | 378.386 | 66.238 |
| mp-9029 | Ca <sub>3</sub> VN <sub>3</sub>                                   | 128.975 | 0.155  |
| mp-9068 | K <sub>2</sub> NaAlP <sub>2</sub>                                 | 55.037  | 0.04   |
| mp-9069 | K <sub>2</sub> NaAlAs <sub>2</sub>                                | 41.286  | 0.038  |
| mp-9107 | NaZrCuS <sub>3</sub>                                              | 32.33   | 0.137  |
| mp-9195 | BaCuSeF                                                           | 118.965 | 0.376  |
| mp-9306 | Sr <sub>2</sub> ZnN <sub>2</sub>                                  | 86.26   | 0.108  |
| mp-9396 | HfTiCuS <sub>3</sub>                                              | 78.058  | 0.121  |
| mp-9486 | K <sub>2</sub> AlF <sub>5</sub>                                   | 76.328  | 0.136  |
| mp-9511 | K <sub>2</sub> AsAuS <sub>4</sub>                                 | 50.963  | 0.102  |
| mp-9583 | K <sub>2</sub> ZnF <sub>4</sub>                                   | 978.704 | 0.042  |
| mp-96   | S                                                                 | 74.632  | 0.205  |
| mp-9640 | SrCu(SeO <sub>3</sub> ) <sub>2</sub>                              | 46.448  | 0.196  |
| mp-9672 | K <sub>2</sub> NiP <sub>2</sub>                                   | 188.085 | 0.136  |
| mp-9726 | SrBeF <sub>4</sub>                                                | 45.242  | 1.029  |
| mp-9986 | CsAuO                                                             | 383.093 | 0.044  |

The Python code for automatically creating the slab structures is made available on Github at the following address ([https://github.com/bmd-lab/mss\\_auto](https://github.com/bmd-lab/mss_auto)) and

is also included below as plain text to facilitate long-term reproducibility.

```
from pymatgen.core import Structure
import numpy as np
from os.path import isfile, join, isdir
from os import listdir, remove, rename, mkdir, getcwd, rmdir
import re
from shutil import copy
import sys
import getopt
pattern_id = r'[m][p][-]\d+'
opts, args =
getopt.getopt(sys.argv[1:], 'hl:d:n:', ["help", "length=", "direction=", '
name='])

def make_supercell(path_unit_cell, path_super_cell, direction):
    """
    Function:
    Make supercell according to the length
    of unit cell along with z direction, and
    the length of final supercell is at least
    15 anstrom.

    Parameters:
    path_poscar_cart: string
    The path of unit cell structure
    super_cell_dir: string
    The path of supercell structure
    """
    dic_line={'x':2, 'y':3, 'z':4}

dic_supercell={'x':[[1,1,1],[2,1,1],[3,1,1],[4,1,1],[5,1,1],[6,1,1]],
'y':[[1,1,1],[1,2,1],[1,3,1],[1,4,1],[1,5,1],[1,6,1]],
'z':[[1,1,1],[1,1,2],[1,1,3],[1,1,4],[1,1,5],[1,1,6]]}
    files = [f for f in listdir(path_unit_cell)
              if isfile(join(path_unit_cell, f))]
    # print("There have {} files of unit cell
files".format(len(files)))
    for i in range(len(files)):
        file_read = open(path_unit_cell + '\\\ ' + files[i], 'r')
        lines = file_read.readlines()
        l = np.array([float(lines[dic_line[direction]].split()[0]),
```

```

float(lines[dic_line[direction]].split()[1]),
float(lines[dic_line[direction]].split()[2]))
l1 = l * l
L = np.sqrt(l1[0] + l1[1] + l1[2])
if L >= 15:
    id = re.search(pattern_id, files[i]).group()
    struc = Structure.from_file(path_unit_cell
                               + '\\' + files[i])
    struc.make_supercell(dic_supercell[direction][0])
    struc.to(filename=path_super_cell + '\\' + id +
str("POSCAR"))
    print(id, ' has make supercell
',dic_supercell[direction][0])
    elif 7.5 <= L < 15:
        id = re.search(pattern_id, files[i]).group()
        struc = Structure.from_file(path_unit_cell + '\\'
                                   + files[i])
        struc.make_supercell(dic_supercell[direction][1])
        struc.to(filename=path_super_cell + '\\' + id +
str("POSCAR"))
        print(id, ' has make supercell
',dic_supercell[direction][1])
        elif 5 <= L < 7.5:
            id = re.search(pattern_id, files[i]).group()
            struc = Structure.from_file(path_unit_cell + '\\'
                                       + files[i])
            struc.make_supercell(dic_supercell[direction][2])
            struc.to(filename=path_super_cell + '\\' + id +
str("POSCAR"))
            print(id, ' has make supercell
',dic_supercell[direction][2])
            elif 3.75 <= L < 5:
                id = re.search(pattern_id, files[i]).group()
                # print(id)
                struc = Structure.from_file(path_unit_cell + '\\'
                                           + files[i])
                struc.make_supercell(dic_supercell[direction][3])
                struc.to(filename=path_super_cell + '\\' + id +
str("POSCAR"))
                print(id, ' has make supercell
',dic_supercell[direction][3])
                elif 3 <= L < 3.75:
                    id = re.search(pattern_id, files[i]).group()
                    struc = Structure.from_file(path_unit_cell + '\\'

```

```

        + files[i])
        struc.make_supercell(dic_supercell[direction][4])
        struc.to(filename=path_super_cell + '\\' + id +
str("POSCAR"))
        print(id, ' has make supercell
',dic_supercell[direction][4])
        elif 2.5 <= L < 3:
            id = re.search(pattern_id, files[i]).group()
            struc = Structure.from_file(path_unit_cell + '\\'
+ files[i])
            struc.make_supercell(dic_supercell[direction][5])
            struc.to(filename=path_super_cell + '\\' + id +
str("POSCAR"))
            print(id, ' has make supercell
',dic_supercell[direction][5])

def add_atom(path_1, path_2,direction):
    """
    Function:
    Produce 1600 different supercell files that the fake
atom in different position of box for every supercell

    Parameters:
    path_1: string
    The path of POSCAR(super cell),and it must be direction
coordinate
    path_2: string
    The path of POSCAR files that contain a fake atom,
and it will include 1600 different cases.

    """
    for i in range(100): # i is the z coordinate of fake atom
        with open(path_1, 'r') as f:
            lines = f.readlines()
            lines[6] = (lines[6].strip('\n')) + ' 1' + '\n' # add
one for atom number
            lines[5] = (lines[5].strip('\n')) + ' X' + '\n' #
suppose the fake atom is X
            for m in np.arange(0.05, 0.95, 0.25): # m is the x
coordinate of fake atom
                for n in np.arange(0.05, 0.95, 0.25): # m is the y
coordinate of fake atom
                    with open(path_2 + '/' + 'POSCAR'
+ '_' + str(m) + '_'

```

```

        + str(n) + '_' + str(i), 'w+') as l:
    for j in range(len(lines)):
        l.write(lines[j])
    if direction == 'x':
        l.write(str(i * 0.01 + 0.005) + ' ' +
                str(m) + ' ' +
                str(n) + ' X')
    elif direction == 'y':
        l.write(str(m) + ' ' +
                str(i * 0.01 + 0.005) + ' ' +
                str(n) + ' X')
    elif direction == 'z':
        l.write(str(m) + ' ' +
                str(n) + ' ' +
                str(i * 0.01 + 0.005) + ' X')

def delet_file(Dir, File):
    # delet files in Dir except File
    files = [f for f in listdir(Dir) if isfile(join(Dir, f))]
    for i in files:
        if i == File:
            pass
        else:
            remove(Dir + '/' + i)

def get_nearest_distance(path):
    """
    Return the list of minimum distance to fake atom of all
    supercells
    and the corresponding structures.

    Parameters
    path: string
    The path to the folder containing supercells files, and the
    supercell
    must be already added with fake atom.
    """
    files = [f for f in listdir(path) if isfile(join(path, f))]
    distance, structure = [], []
    for i in range(len(files)):
        s = Structure.from_file(path + '/' + files[i])
        d = s.distance_matrix
        t = d[:, -1]
        tt = np.delete(t, [-1])

```





```

        y_cartesian.append(
            float(line[k].split()[0]) * b1
            + float(line[k].split()[1]) * b2
            + float(line[k].split()[2]) * b3)
        z_cartesian.append(
            float(line[k].split()[0]) * c1
            + float(line[k].split()[1]) * c2
            + float(line[k].split()[2]) * c3)
    with open(cart_path + "\\\" + onlyfiles[i], "w",
encoding="utf-8") as f:
        for j in range(7):
            f.write(line[j])
        f.write("Cartesian\n")
        for l in range(num_atoms):
            string = str(x_cartesian[l]) \
                + " " + str(y_cartesian[l]) \
                + " " + str(z_cartesian[l]) + "\n"
            f.write(string)
    except:
        print(onlyfiles[i])

```

```

def Get_num_of_atom(path, file):
    # get the number of atoms in POSCAR
    # return a data of int type
    with open(path + '/' + file, 'r') as f:
        line = f.readlines()
        num_atoms = sum([int(x) for x in line[6].split()])
    return num_atoms

```

```

def insert_empty(dir1, dir2, distance, file,direction):
    """
    Function:
    Introduce an empty layer in the end of POSCAR
    along with z direction

    Parameters:
    dir1: string
    The path of origin POSCAR files and the coordinate of POSCAR
    can be direction or cartesian
    dir_2: string
    The path of POSCAR files that have introduced empty layer
    space
    distance: int
    The length of empty layer
    """

```

```

file: string
Name of structure, such as :POSCAR,id+POSCAR
"""
dic_line = {'x': 2, 'y': 3, 'z': 4}
with open(dir1 + '/' + file, 'r') as f:
    lines = f.readlines()
    # print(len(lines))
    a, b, c = float(lines[dic_line[direction]].split()[0]), \
              float(lines[dic_line[direction]].split()[1]), \
              float(lines[dic_line[direction]].split()[2])
    # print(a,b,c)
    vector = np.array([a, b, c])
    length = np.sum(np.square(vector)) ** 0.5
    L = length + distance
    ratio = L / length
    new_vector = vector * ratio
    with open(dir2 + '/' + file, 'w') as f:
        lines[dic_line[direction]] = str(new_vector[0]) \
            + ' ' + str(new_vector[1]) \
            + ' ' + str(new_vector[2]) + '\n'
    for i in lines:
        f.write(i)

def move_atom(dir1, atom_num, dir2, file, length, direction):
    """
    Function:
    Move atoms that higher than fake atom,
    equivalent to the effect of moving the
    vacuum layer.

    Parameters:
    dir1: string
    The path of supercell files that
    contain vacuum layer, and the atoms haven't
    moved
    atom_num: int
    The number of atoms in POSCAR file
    dir2: string
    The path of supercell files that
    contain vacuum layer, and the atoms have
    moved according to the position of atoms
    file: string
    Name of structure, such as :POSCAR,id+POSCAR
    length: int

```

The distance of atom need to be moved,  
it should stay the same with the  
length of vacuum layer

"""

```
dic_num={'x':0, 'y':1,'z':2}
with open(dir1 + '//'+ file, 'r') as f:
    lines = f.readlines()
    high = float(lines[-1].split()[dic_num[direction]])
    #         print(z_fake)
    for i in range(atom_num - 1):
        x, y, z = float(lines[8 + i].split()[0]), \
                  float(lines[8 + i].split()[1]), \
                  float(lines[8 + i].split()[2])
        if direction == 'x':
            if high < 0 and x < high:
                x_new = x - length
                lines[8 + i] = str(x_new) + ' ' \
                               + str(y) + ' ' \
                               + str(z) + '\n'
            elif high > 0 and x > high:
                x_new = x + length
                lines[8 + i] = str(x_new) + ' ' \
                               + str(y) + ' ' \
                               + str(z) + '\n'
        elif direction == 'y':
            if high < 0 and y < high:
                y_new = y - length
                lines[8 + i] = str(x) + ' ' \
                               + str(y_new) + ' ' \
                               + str(z) + '\n'
            elif high > 0 and y > high:
                y_new = y + length
                lines[8 + i] = str(x) + ' ' \
                               + str(y_new) + ' ' \
                               + str(z) + '\n'
        elif direction == 'z':
            if high < 0 and z < high:
                z_new = z - length
                lines[8 + i] = str(x) + ' ' \
                               + str(y) + ' ' \
                               + str(z_new) + '\n'
            elif high > 0 and z > high:
                z_new = z + length
                lines[8 + i] = str(x) + ' ' \
```

```

        + str(y) + ' ' \
        + str(z_new) + '\n'
    with open(dir2 + '//'+ file, 'w+') as f:
        for i in lines:
            f.write(i)

def delet_fake_atom(dir1, dir2, file):
    """
    Function:
    Delet the fake atom of slab structure

    Parameters:
    dir1: string
    The path of slab structure contained
    with fake atom
    dir2: string
    The path of slab structure that
    have deleted fake atom
    file: string
    Name of structure,such as :POSCAR,id+POSCAR
    """
    with open(dir1 + '//'+ file, 'r') as f:
        lines = f.readlines()
        s = lines[5].split()
        s2 = lines[6].split()
        n_s, n_s2 = s[:-1], s2[:-1]
        line5, line6 = '', ''
        for i in range(len(n_s)):
            line5 += n_s[i] + ' '
            line6 += n_s2[i] + ' '
        new_line5 = line5 + '\n'
        new_line6 = line6 + '\n'
        #         print(new_line5,new_line6)
        lines[5], lines[6] = new_line5, new_line6
        with open(dir2 + '//'+ file, 'w+') as f:
            for i in lines:
                f.write(i)

def main(length,direction,unit_cell_dir):
    name=unit_cell_dir.split('//')[-1]
    supercell_dir=unit_cell_dir[:-len(name)]+'super'
    slab_dir=unit_cell_dir[:-len(name)]+'slab'
    mkdir(supercell_dir)
    mkdir(slab_dir)

```

```

make_supercell(unit_cell_dir, supercell_dir,direction)
files=[f for f in listdir(supercell_dir) if isfile
(join(supercell_dir,f))]
mkdir(slab_dir+'//Final_slab')
for file in files:
    mkdir(slab_dir + '/' + file)
    mkdir(slab_dir + '/' + file + '/add')
    mkdir(slab_dir + '/' + file + '/cartesian')
    mkdir(slab_dir + '/' + file + '/add_empty')
    mkdir(slab_dir + '/' + file + '/move_atom')
    mkdir(slab_dir + '/' + file + '/final_slab')

poscar_dir= slab_dir+'//'+file+"/add"
cart_dir = slab_dir+'//'+file+"/cartesian"
insert_empty_dir = slab_dir+'//'+file+'/add_empty'
move_atom_dir = slab_dir+'//'+file+'/move_atom'
final_slab_dir = slab_dir+'//'+file+'/final_slab'

s = Structure.from_file(supercell_dir + '/' + file)
s.to(filename=slab_dir + '/' + file + '/' + 'POSCAR')
path_1 = slab_dir + '/' + file + '/' + 'POSCAR'
path_2 = slab_dir + '/' + file + '/' + 'add'
try:
    max_dis=[]
    add_atom(path_1, path_2, direction)
    d, stru = get_nearest_distance(path_2)
    max_dis.append(max(d))
    delet_file(path_2, stru[d.index(max(d))])
    rename(path_2 + '/' + stru[d.index(max(d))], path_2 +
'/' + file)
    print(file, 'is OK!!!')
except:
    print(file, 'Happen something wrong')
dir_trans_cart(poscar_dir, cart_dir)
num = Get_num_of_atom(cart_dir, file)
insert_empty(cart_dir, insert_empty_dir, length, file, direction)
move_atom(insert_empty_dir, num, move_atom_dir,
file, length, direction)
delet_fake_atom(move_atom_dir, final_slab_dir, file)
copy(final_slab_dir+'//'+file,slab_dir+'//Final_slab//'+file)
dir=getcwd()
unit_name='unit_cell'
length,direction='', ''

```

```

try:
    for k, v in opts:
        if k in ('-n', '--name'):
            unit_name = v
        elif k in ('-l', '--length'):
            length = int(v)
        elif k in ('-d', '--direction'):
            direction = v
        elif k in ('-h', '--help'):
            print('Hello!! ', '\n',
                  'Before running this script' \
                  ' you are expect to creat a new folder named', '\n',
                  'unit_cell for storing the unit cell files' \
                  ' and fill the following three options', '\n',
                  'with right information', '\n'
                  'Options:', '\n',
                  '-n, --name    the name of '\
                  'unit cell folder', '\n',
                  '-l, --length  the length of '\
                  'empty layer', '\n',
                  '-d, --direction  the direction of ' \
                  'makeing supercell', '\n'
                  )
            unit_dir=dir+'\\'+ unit_name
            main(length,direction,unit_dir)
except:
    rmdir(dir+'\\'+slab')
    rmdir(dir+'\\'+super')

```
